# Supplementary material
Source: publisher site journal article supplement (https://www.spandidos-publications.com/7094/downloadSupplementary)
Supplement: Supplementary file 1 [file downloadSupplementary]

## Sheet: Sheet1
Table SI.	Differentially expressed genes between the NGR1 + OxyHb and OxyHb groups.
GeneName	log2FC	Pvalue	padj	N1_HT22	N2_HT22	N3_HT22	C1_HT22	C2_HT22	C3_HT22	EnsemblID	GeneID	chromosome	start	end	strand	Biological_Process	Molecular_Function	Cellular_Component	KO	Pathway	PathwayName	Description	change
Abcc2	3.46848	4.09e-11	2.59e-10	44	57	46	5	3	6	ENSMUSG00000025194	100038628	19	43782192	43840740	+	GO:0006855|drug transmembrane transport;GO:0006979|response to oxidative stress;GO:0007565|female pregnancy;GO:0009408|response to heat;GO:0015694|mercury ion transport;GO:0015722|canalicular bile acid transport;GO:0015732|prostaglandin transport;GO:00169	NA	NA	NA|(RefSeq) predicted gene 10768	NA	NA	ATP-binding cassette, sub-family C (CFTR/MRP), member 2	up
Hist1h3g	-2.15264	8.24e-05	0.0002901	5	5	10	41	33	21	ENSMUSG00000099517	97908	13	23535422	23535951	+	GO:0006334|nucleosome assembly;GO:0006335|DNA replication-dependent nucleosome assembly;GO:0051290|protein heterotetramerization;GO:0060968|regulation of gene silencing	NA	NA	K11253|histone H3	mmu05034|mmu05202|mmu05322	Alcoholism|Transcriptional misregulation in cancer|Systemic lupus erythematosus	histone cluster 1, H3g	down
Hist1h1c	2.01733	1.1e-27	1.69e-26	253	344	335	73	81	88	ENSMUSG00000036181	50708	13	23738808	23740367	+	GO:0000122|negative regulation of transcription by RNA polymerase II;GO:0006334|nucleosome assembly;GO:0006357|regulation of transcription by RNA polymerase II;GO:0016584|nucleosome positioning;GO:0080182|histone H3-K4 trimethylation;GO:0098532|histone H3	NA	NA	K11275|histone H1/5	NA	NA	histone cluster 1, H1c	up
Pcdhac2	2.04864	3.92e-05	0.00014351	58	36	23	15	6	9	ENSMUSG00000102697	353237	18	37143503	37187657	+	GO:0007155|cell adhesion;GO:0007156|homophilic cell adhesion via plasma membrane adhesion molecules;GO:0007399|nervous system development	NA	NA	K16493|protocadherin alpha	NA	NA	protocadherin alpha subfamily C, 2	up
AU021092	-2.63075	5.52e-44	1.53e-42	46	68	40	364	340	304	ENSMUSG00000051669	239691	16	5211823	5222299	-	GO:0008150|biological_process	NA	NA	NA|(RefSeq) expressed sequence AU021092	NA	NA	expressed sequence AU021092	down
Rcan2	-5.23514	2.87e-22	3.47e-21	1	5	3	120	121	116	ENSMUSG00000039601	53901	17	43801351	44039516	+	GO:0006979|response to oxidative stress;GO:0007219|Notch signaling pathway;GO:0007614|short-term memory;GO:0019722|calcium-mediated signaling;GO:0031987|locomotion involved in locomotory behavior;GO:0033173|calcineurin-NFAT signaling cascade;GO:0043666|re	NA	NA	K17903|calcipressin-2	mmu04919	Thyroid hormone signaling pathway	regulator of calcineurin 2	down
Dzank1	2.52711	1.2e-06	5.24e-06	40	36	28	6	7	6	ENSMUSG00000037259	241688	2	144470557	144527414	-	NA	NA	GO:0005575|cellular_component	NA|(RefSeq) double zinc ribbon and ankyrin repeat domains 1	NA	NA	double zinc ribbon and ankyrin repeat domains 1	up
Fam43a	-2.11042	4.27e-112	5.06e-110	264	331	312	1564	1376	1208	ENSMUSG00000046546	224093	16	30599723	30602797	+	GO:0008150|biological_process	NA	NA	NA|(RefSeq) family with sequence similarity 43, member A	NA	NA	family with sequence similarity 43, member A	down
Abca8b	2.14208	5.11e-29	8.2e-28	241	224	235	52	62	53	ENSMUSG00000020620	27404	11	109932190	109995845	-	GO:0055085|transmembrane transport	NA	NA	K05650|ATP-binding cassette, subfamily A (ABC1), member 8	mmu02010	ABC transporters	ATP-binding cassette, sub-family A (ABC1), member 8b	up
Chd7	3.09827	0.00318557	0.00867434	12	11	9	3	0	1	ENSMUSG00000041235	320790	4	8690406	8867659	+	GO:0001501|skeletal system development;GO:0001568|blood vessel development;GO:0001701|in utero embryonic development;GO:0001974|blood vessel remodeling;GO:0003007|heart morphogenesis;GO:0003222|ventricular trabecula myocardium morphogenesis;GO:0003226|rig	NA	NA	K14437|chromodomain-helicase-DNA-binding protein 7 [EC:3.6.4.12]	NA	NA	chromodomain helicase DNA binding protein 7	up
C3	-2.29383	2.41e-14	1.9e-13	31	20	23	184	95	108	ENSMUSG00000024164	12266	17	57203970	57228136	-	GO:0001798|positive regulation of type IIa hypersensitivity;GO:0001934|positive regulation of protein phosphorylation;GO:0001970|positive regulation of activation of membrane attack complex;GO:0002376|immune system process;GO:0006629|lipid metabolic proce	NA	NA	K03990|complement component 3	mmu04145|mmu04610|mmu05133|mmu05134|mmu05140|mmu05142|mmu05150|mmu05152|mmu05167|mmu05168|mmu05203|mmu05322	Phagosome|Complement and coagulation cascades|Pertussis|Legionellosis|Leishmaniasis|Chagas disease (American trypanosomiasis)|Staphylococcus aureus infection|Tuberculosis|Kaposi sarcoma-associated herpesvirus infection|Herpes simplex infection|Viral carci	complement component 3	down
Cp	-4.75713	0	0	60	67	69	2066	1843	1693	ENSMUSG00000003617	12870	3	19957054	20009145	+	GO:0006811|ion transport;GO:0006825|copper ion transport;GO:0006879|cellular iron ion homeostasis;GO:0046688|response to copper ion;GO:0055114|oxidation-reduction process	NA	NA	K13624|ceruloplasmin [EC:1.16.3.1]	mmu00860|mmu04216	Porphyrin and chlorophyll metabolism|Ferroptosis	ceruloplasmin	down
Gm45838	-2.33509	0.000290362	0.000945722	5	5	3	20	30	19	ENSMUSG00000108825	NA	7	83633371	83635817	+	NA	NA	NA	NA	NA	NA	predicted gene 45838	down
Rnf128	5.57318	0.00020354	0.000676177	11	5	9	0	0	0	ENSMUSG00000031438	66889	X	139563316	139673145	+	GO:0016567|protein ubiquitination;GO:0031647|regulation of protein stability;GO:0042036|negative regulation of cytokine biosynthetic process	NA	NA	K10629|E3 ubiquitin-protein ligase RNF128 [EC:2.3.2.27]	NA	NA	ring finger protein 128	up
Tmem91	2.78955	2.29e-05	8.62e-05	25	26	21	3	6	2	ENSMUSG00000061702	320208	7	25669139	25675166	-	GO:0002244|hematopoietic progenitor cell differentiation	NA	NA	NA|(RefSeq) transmembrane protein 91	NA	NA	transmembrane protein 91	up
Rnf112	-5.90769	6.55e-06	2.63e-05	0	1	0	34	16	19	ENSMUSG00000010086	22671	11	61448442	61454131	-	GO:0007050|cell cycle arrest;GO:0007399|nervous system development;GO:0016567|protein ubiquitination;GO:0030182|neuron differentiation;GO:0033194|response to hydroperoxide;GO:0036473|cell death in response to oxidative stress;GO:0036474|cell death in resp	NA	NA	NA|(RefSeq) ring finger protein 112	NA	NA	ring finger protein 112	down
4933417D19Rik	5.18441	0.00106137	0.00316038	4	7	8	0	0	0	ENSMUSG00000097637	71186	8	123235091	123242359	+	NA	NA	NA	NA|(RefSeq) RIKEN cDNA 4933417D19 gene	NA	NA	RIKEN cDNA 4933417D19 gene	up
Rnf150	-2.32815	2.9e-07	1.34e-06	6	10	10	52	41	45	ENSMUSG00000047747	330812	8	82863356	83091268	+	GO:0016567|protein ubiquitination	NA	NA	NA|(RefSeq) ring finger protein 150	NA	NA	ring finger protein 150	down
Rnf183	3.10985	0.00281525	0.00774244	9	11	13	0	3	1	ENSMUSG00000063851	76072	4	62427540	62435252	-	GO:0000209|protein polyubiquitination;GO:0006915|apoptotic process;GO:0016567|protein ubiquitination;GO:0034976|response to endoplasmic reticulum stress;GO:0051865|protein autoubiquitination;GO:1902237|positive regulation of endoplasmic reticulum stress-i	NA	NA	K22157|E3 ubiquitin-protein ligase RNF183 [EC:2.3.2.31]	NA	NA	ring finger protein 183	up
Ccdc102a	-2.34372	4.21e-41	1.05e-39	56	72	56	369	323	296	ENSMUSG00000063605	234582	8	94902869	94918098	-	GO:0008150|biological_process	NA	NA	K16759|coiled-coil domain-containing protein 102A	NA	NA	coiled-coil domain containing 102A	down
Hecw2	7.23861	4.38e-09	2.37e-08	49	58	47	1	0	0	ENSMUSG00000042807	329152	1	53806876	54195168	-	GO:0016567|protein ubiquitination;GO:0030071|regulation of mitotic metaphase/anaphase transition	NA	NA	K12168|E3 ubiquitin-protein ligase HECW2 [EC:2.3.2.26]	NA	NA	HECT, C2 and WW domain containing E3 ubiquitin protein ligase 2	up
Plin4	-3.25356	1.04e-12	7.41e-12	5	11	4	86	61	56	ENSMUSG00000002831	57435	17	56100591	56109803	-	NA	NA	GO:0005737|cytoplasm;GO:0005811|lipid droplet;GO:0005829|cytosol;GO:0005886|plasma membrane;GO:0016020|membrane;GO:0043231|intracellular membrane-bounded organelle	K20254|perilipin-4	mmu03320	PPAR signaling pathway	perilipin 4	down
2210010C04Rik	4.23711	0.000673983	0.00207143	10	14	12	0	1	1	ENSMUSG00000029882	67373	6	41030268	41035509	-	GO:0006508|proteolysis	NA	NA	K01312|trypsin [EC:3.4.21.4]	mmu04080|mmu04972|mmu04974|mmu05164	Neuroactive ligand-receptor interaction|Pancreatic secretion|Protein digestion and absorption|Influenza A	RIKEN cDNA 2210010C04 gene	up
Akap17b	3.05531	0.00132487	0.00387209	13	9	17	2	3	0	ENSMUSG00000059708	338351	X	36608314	36645395	-	GO:0006397|mRNA processing;GO:0008150|biological_process;GO:0008380|RNA splicing	NA	NA	K13169|splicing factor, arginine/serine-rich 17	NA	NA	A kinase (PRKA) anchor protein 17B	up
Lcp1	4.05327	2.27e-38	5.25e-37	171	189	176	9	12	13	ENSMUSG00000021998	18826	14	75131101	75230842	+	GO:0002286|T cell activation involved in immune response;GO:0009611|response to wounding;GO:0010737|protein kinase A signaling;GO:0016477|cell migration;GO:0022617|extracellular matrix disassembly;GO:0031100|animal organ regeneration;GO:0033157|regulation	NA	NA	K17276|plastin-2	NA	NA	lymphocyte cytosolic protein 1	up
Asxl3	-2.97006	6.09e-16	5.26e-15	16	14	7	126	117	66	ENSMUSG00000045215	211961	18	22344883	22530227	+	GO:0006351|transcription, DNA-templated;GO:0006355|regulation of transcription, DNA-templated	NA	NA	K11471|additional sex combs-like protein	NA	NA	additional sex combs like 3, transcriptional regulator	down
5430425K12Rik	4.8398	5.44e-05	0.00019519	20	10	24	1	1	0	ENSMUSG00000114554	NA	13	80940411	80948597	+	NA	NA	NA	NA	NA	NA	RIKEN cDNA 5430425K12 gene	up
E330034G19Rik	3.80755	0.000413033	0.00131422	11	16	13	1	0	2	ENSMUSG00000038925	105418	14	24293214	24309966	+	GO:0032436|positive regulation of proteasomal ubiquitin-dependent protein catabolic process	NA	NA	NA|(RefSeq) RIKEN cDNA E330034G19 gene	NA	NA	RIKEN cDNA E330034G19 gene	up
Phactr1	-3.74915	1.38e-17	1.32e-16	7	4	7	92	78	85	ENSMUSG00000054728	218194	13	42680623	43138526	+	GO:0031032|actomyosin structure organization;GO:0031532|actin cytoskeleton reorganization;GO:0032515|negative regulation of phosphoprotein phosphatase activity;GO:0042325|regulation of phosphorylation;GO:0043149|stress fiber assembly;GO:0043666|regulation	NA	NA	NA|(RefSeq) phosphatase and actin regulator 1	NA	NA	phosphatase and actin regulator 1	down
Pcsk4	-2.05513	3.49e-09	1.91e-08	24	15	18	62	99	86	ENSMUSG00000020131	18551	10	80321283	80329498	-	GO:0006508|proteolysis;GO:0007339|binding of sperm to zona pellucida;GO:0007340|acrosome reaction;GO:0009566|fertilization;GO:0016485|protein processing;GO:0022414|reproductive process;GO:0048240|sperm capacitation	NA	NA	K08671|proprotein convertase subtilisin/kexin type 4 [EC:3.4.21.-]	NA	NA	proprotein convertase subtilisin/kexin type 4	down
2610028E06Rik	-2.43932	0.000312875	0.00101374	3	3	5	23	20	20	ENSMUSG00000085562	72395	4	125887851	125922417	-	NA	NA	NA	NA|(RefSeq) RIKEN cDNA 2610028E06 gene	NA	NA	RIKEN cDNA 2610028E06 gene	down
Fam13a	2.10041	5.29e-07	2.39e-06	53	43	42	13	11	10	ENSMUSG00000037709	58909	6	58932090	59024549	-	GO:0008150|biological_process	NA	NA	NA|(RefSeq) family with sequence similarity 13, member A	NA	NA	family with sequence similarity 13, member A	up
Fam13c	-2.17998	9.41e-49	2.97e-47	92	94	82	479	437	369	ENSMUSG00000043259	71721	10	70440481	70558736	+	GO:0008150|biological_process	NA	NA	NA|(RefSeq) family with sequence similarity 13, member C	NA	NA	family with sequence similarity 13, member C	down
Slfn10-ps	2.90142	0.00236584	0.0066015	12	10	13	3	1	1	ENSMUSG00000072621	237887	11	83028130	83040042	-	NA	NA	NA	NA|(RefSeq) schlafen 10, pseudogene	NA	NA	schlafen 10, pseudogene	up
Sema3b	-2.21137	6.89e-35	1.4e-33	72	50	63	324	289	290	ENSMUSG00000057969	20347	9	107597674	107609229	-	NA	NA	NA	K06840|semaphorin 3	mmu04360	Axon guidance	sema domain, immunoglobulin domain (Ig), short basic domain, secreted, (semaphorin) 3B	down
Abhd3	3.18295	5.68e-12	3.81e-11	63	53	56	9	3	8	ENSMUSG00000002475	106861	18	10644411	10706771	-	GO:0006629|lipid metabolic process;GO:0046470|phosphatidylcholine metabolic process	NA	NA	K13696|abhydrolase domain-containing protein 1/3	NA	NA	abhydrolase domain containing 3	up
Lepr	2.58172	4.31e-07	1.96e-06	35	43	36	4	10	6	ENSMUSG00000057722	16847	4	101717404	101815352	+	GO:0001525|angiogenesis;GO:0006909|phagocytosis;GO:0007165|signal transduction;GO:0008203|cholesterol metabolic process;GO:0010507|negative regulation of autophagy;GO:0019221|cytokine-mediated signaling pathway;GO:0019222|regulation of metabolic process;G	NA	NA	K05062|leptin receptor	mmu04060|mmu04080|mmu04152|mmu04630|mmu04920|mmu04932	Cytokine-cytokine receptor interaction|Neuroactive ligand-receptor interaction|AMPK signaling pathway|Jak-STAT signaling pathway|Adipocytokine signaling pathway|Non-alcoholic fatty liver disease (NAFLD)	leptin receptor	up
Prcd	-2.72241	0.0034878	0.00942684	0	4	2	25	9	9	ENSMUSG00000075410	100038570	11	116653534	116668389	+	GO:0007601|visual perception;GO:0050896|response to stimulus	NA	NA	K19637|progressive rod-cone degeneration protein	NA	NA	photoreceptor disc component	down
Prlr	4.93341	0.00261504	0.00722994	5	5	6	0	0	0	ENSMUSG00000005268	19116	15	10177238	10349180	+	GO:0007171|activation of transmembrane receptor protein tyrosine kinase activity;GO:0007259|receptor signaling pathway via JAK-STAT;GO:0007595|lactation;GO:0009617|response to bacterium;GO:0030155|regulation of cell adhesion;GO:0030856|regulation of epith	NA	NA	K05081|prolactin receptor	mmu04060|mmu04080|mmu04151|mmu04630|mmu04917	Cytokine-cytokine receptor interaction|Neuroactive ligand-receptor interaction|PI3K-Akt signaling pathway|Jak-STAT signaling pathway|Prolactin signaling pathway	prolactin receptor	up
Clmp	-3.26831	8.86e-47	2.66e-45	20	33	26	297	265	243	ENSMUSG00000032024	71566	9	40685962	40785319	+	GO:0048565|digestive tract development	NA	NA	K06789|adipocyte-specific adhesion molecule	NA	NA	CXADR-like membrane protein	down
Cln5	2.04585	6.59e-96	5.84e-94	1031	1065	1141	285	257	284	ENSMUSG00000022125	211286	14	103070216	103077628	+	GO:0006465|signal peptide processing;GO:0007040|lysosome organization;GO:0007042|lysosomal lumen acidification;GO:0007420|brain development;GO:0007601|visual perception;GO:0022008|neurogenesis;GO:0042147|retrograde transport, endosome to Golgi;GO:0070085|	NA	NA	K12390|ceroid-lipofuscinosis neuronal protein 5	mmu04142	Lysosome	ceroid-lipofuscinosis, neuronal 5	up
Gm16046	-2.37532	0.000903655	0.00271843	1	4	6	29	14	18	ENSMUSG00000085705	NA	17	13675662	13683516	-	NA	NA	NA	NA	NA	NA	predicted gene 16046	down
Cmbl	2.36446	6.19e-09	3.31e-08	62	78	40	14	13	10	ENSMUSG00000022235	69574	15	31565389	31590119	+	GO:0008150|biological_process	NA	NA	K01061|carboxymethylenebutenolidase [EC:3.1.1.45]	mmu01100	Metabolic pathways	carboxymethylenebutenolidase-like (Pseudomonas)	up
Gm41077	-3.1384	0.0022312	0.00625657	2	1	1	20	12	6	ENSMUSG00000114369	NA	13	119756093	119769532	+	NA	NA	NA	NA	NA	NA	predicted gene, 41077	down
Lgi4	-4.63699	2.38e-06	1e-05	0	2	1	37	25	18	ENSMUSG00000036560	243914	7	31059342	31070935	+	GO:0008344|adult locomotory behavior;GO:0014009|glial cell proliferation;GO:0014044|Schwann cell development;GO:0021782|glial cell development;GO:0022011|myelination in peripheral nervous system;GO:0031641|regulation of myelination;GO:0042063|gliogenesis;	NA	NA	NA|(RefSeq) leucine-rich repeat LGI family, member 4	NA	NA	leucine-rich repeat LGI family, member 4	down
Gm8818	4.42433	0.00362113	0.00976121	12	5	5	0	0	1	ENSMUSG00000079138	NA	1	153305432	153306478	+	NA	NA	NA	NA	NA	NA	predicted pseudogene 8818	up
Fetub	2.02989	9.03e-21	1.03e-19	199	179	199	42	46	60	ENSMUSG00000022871	59083	16	22918334	22939778	+	GO:0007338|single fertilization;GO:0007339|binding of sperm to zona pellucida;GO:0010466|negative regulation of peptidase activity;GO:0010951|negative regulation of endopeptidase activity	NA	NA	NA|(RefSeq) fetuin beta	NA	NA	fetuin beta	up
Gm31718	3.19563	0.00052031	0.00162897	14	13	16	2	3	0	ENSMUSG00000110697	NA	8	126812640	126908215	-	NA	NA	NA	NA	NA	NA	predicted gene, 31718	up
Lgr6	5.63309	0.000184401	0.000617699	8	4	14	0	0	0	ENSMUSG00000042793	329252	1	134983301	135105276	-	GO:0007165|signal transduction;GO:0007186|G protein-coupled receptor signaling pathway;GO:0016055|Wnt signaling pathway;GO:0030177|positive regulation of Wnt signaling pathway;GO:0030335|positive regulation of cell migration;GO:0042246|tissue regeneration	NA	NA	K08399|leucine-rich repeat-containing G protein-coupled receptor 6	NA	NA	leucine-rich repeat-containing G protein-coupled receptor 6	up
Tktl1	2.12965	9.55e-06	3.75e-05	35	34	38	11	10	5	ENSMUSG00000031397	83553	X	74177259	74208500	+	NA	NA	GO:0005575|cellular_component;GO:0005634|nucleus;GO:0005737|cytoplasm	K00615|transketolase [EC:2.2.1.1]	mmu00030|mmu01100|mmu01200|mmu01230	Pentose phosphate pathway|Metabolic pathways|Carbon metabolism|Biosynthesis of amino acids	transketolase-like 1	up
Ptx3	-3.17204	1.26e-96	1.14e-94	401	427	442	4164	3432	4419	ENSMUSG00000027832	19288	3	66219910	66225805	+	GO:0001550|ovarian cumulus expansion;GO:0001878|response to yeast;GO:0008228|opsonization;GO:0030198|extracellular matrix organization;GO:0044869|negative regulation by host of viral exo-alpha-sialidase activity;GO:0044871|negative regulation by host of v	NA	NA	NA|(RefSeq) pentraxin related gene	NA	NA	pentraxin related gene	down
Gm11816	-6.06281	1.04e-11	6.82e-11	1	0	2	69	75	67	ENSMUSG00000086233	NA	4	9283972	9287391	-	NA	NA	NA	NA	NA	NA	predicted gene 11816	down
Slc14a1	-3.26815	0.00108856	0.00323335	1	1	2	11	10	19	ENSMUSG00000059336	108052	18	78100091	78142119	-	GO:0006833|water transport;GO:0015840|urea transport;GO:0071918|urea transmembrane transport	NA	NA	K08716|solute carrier family 14 (urea transporter)	NA	NA	solute carrier family 14 (urea transporter), member 1	down
Cobl	4.0831	7.41e-06	2.95e-05	23	14	27	2	1	1	ENSMUSG00000020173	12808	11	12236608	12464960	-	GO:0000578|embryonic axis specification;GO:0001757|somite specification;GO:0001843|neural tube closure;GO:0001889|liver development;GO:0030041|actin filament polymerization;GO:0030903|notochord development;GO:0033504|floor plate development;GO:0048565|dig	NA	NA	K18623|protein cordon-bleu	NA	NA	cordon-bleu WH2 repeat	up
Csprs	5.36437	8.85e-05	0.000310079	12	11	19	0	0	1	ENSMUSG00000062783	114564	GL456221.1	111572	163011	-	GO:0007186|G protein-coupled receptor signaling pathway	NA	NA	NA|(RefSeq) component of Sp100-rs	NA	NA	component of Sp100-rs	up
Lipn	6.55641	1.12e-09	6.33e-09	57	49	73	0	0	2	ENSMUSG00000024770	70166	19	34067358	34084918	+	GO:0006629|lipid metabolic process;GO:0016042|lipid catabolic process	NA	NA	NA|(RefSeq) lipase, family member N	NA	NA	lipase, family member N	up
Ucp2	-3.04725	0.000139533	0.000474486	2	3	2	25	28	9	ENSMUSG00000033685	22228	7	100493337	100502020	+	GO:0000303|response to superoxide;GO:0001666|response to hypoxia;GO:0006839|mitochondrial transport;GO:0007565|female pregnancy;GO:0007568|aging;GO:0009749|response to glucose;GO:0010942|positive regulation of cell death;GO:0032869|cellular response to in	NA	NA	K15103|solute carrier family 25 (mitochondrial uncoupling protein), member 8/9	NA	NA	uncoupling protein 2 (mitochondrial, proton carrier)	down
Gm45338	-3.25564	1.15e-06	5.03e-06	6	2	2	57	26	20	ENSMUSG00000109783	NA	16	23520210	23560081	+	NA	NA	NA	NA	NA	NA	predicted gene 45338	down
2210008F06Rik	-3.94491	0.00213959	0.00602683	1	0	1	8	11	13	ENSMUSG00000097165	NA	11	77489854	77491409	+	NA	NA	NA	NA	NA	NA	RIKEN cDNA 2210008F06 gene	down
Sptbn5	2.79909	0.00193662	0.00550088	13	11	15	3	3	0	ENSMUSG00000074899	NA	2	120041493	120085693	-	NA	NA	NA	NA	NA	NA	spectrin beta, non-erythrocytic 5	up
Nhsl1	-2.2626	2.04e-05	7.71e-05	7	4	9	40	38	24	ENSMUSG00000039835	215819	10	18318985	18533892	+	NA	GO:0003674|molecular_function	NA	NA|(RefSeq) NHS-like 1	NA	NA	NHS-like 1	down
Fam71f1	-2.0046	1.04e-18	1.06e-17	35	44	40	197	161	148	ENSMUSG00000039742	330277	6	29319140	29336019	+	GO:0008150|biological_process	NA	NA	NA|(RefSeq) family with sequence similarity 71, member F1	NA	NA	family with sequence similarity 71, member F1	down
9630028H03Rik	-5.24552	0.000699131	0.00214156	0	0	0	6	10	6	ENSMUSG00000085631	320684	2	135325447	135583584	-	NA	NA	NA	NA|(RefSeq) RIKEN cDNA 9630028H03 gene	NA	NA	RIKEN cDNA 9630028H03 gene	down
Gm11775	-4.91682	0.00315947	0.00860963	0	0	0	11	2	5	ENSMUSG00000086835	NA	11	121029402	121052357	+	NA	NA	NA	NA	NA	NA	predicted gene 11775	down
Cntnap1	2.44736	5.68e-08	2.8e-07	50	39	46	8	8	10	ENSMUSG00000017167	53321	11	101170523	101190724	+	GO:0002175|protein localization to paranode region of axon;GO:0007010|cytoskeleton organization;GO:0007155|cell adhesion;GO:0019227|neuronal action potential propagation;GO:0022010|central nervous system myelination;GO:0022011|myelination in peripheral ne	NA	NA	K07379|contactin associated protein 1	mmu04514	Cell adhesion molecules (CAMs)	contactin associated protein-like 1	up
Doc2g	-5.70517	0.000110681	0.000382235	0	0	0	14	13	4	ENSMUSG00000024871	60425	19	4003321	4007005	+	NA	NA	GO:0016020|membrane	K19918|double C2-like domain-containing protein gamma	NA	NA	double C2, gamma	down
Calml4	-4.87189	2.58e-41	6.53e-40	10	6	6	291	192	201	ENSMUSG00000032246	75600	9	62858080	62875921	+	NA	GO:0005509|calcium ion binding	NA	K02183|calmodulin	mmu04014|mmu04015|mmu04020|mmu04022|mmu04024|mmu04070|mmu04114|mmu04218|mmu04261|mmu04270|mmu04371|mmu04625|mmu04713|mmu04720|mmu04722|mmu04728|mmu04740|mmu04744|mmu04750|mmu04910|mmu04912|mmu04915|mmu04916|mmu04921|mmu04922|mmu04924|mmu04925|mmu04970|mmu	Ras signaling pathway|Rap1 signaling pathway|Calcium signaling pathway|cGMP-PKG signaling pathway|cAMP signaling pathway|Phosphatidylinositol signaling system|Oocyte meiosis|Cellular senescence|Adrenergic signaling in cardiomyocytes|Vascular smooth muscle	calmodulin-like 4	down
Slc18a1	4.72783	0.00115771	0.0034224	7	8	12	0	1	0	ENSMUSG00000036330	110877	8	69037711	69089235	-	GO:0006836|neurotransmitter transport;GO:0006855|drug transmembrane transport;GO:0015893|drug transport;GO:0033603|positive regulation of dopamine secretion;GO:0051610|serotonin uptake;GO:0051612|negative regulation of serotonin uptake;GO:0055085|transmem	NA	NA	K08155|MFS transporter, DHA1 family, solute carrier family 18 (vesicular amine transporter), member 1/2	mmu04721|mmu04726|mmu04728|mmu05012|mmu05030|mmu05031|mmu05034	Synaptic vesicle cycle|Serotonergic synapse|Dopaminergic synapse|Parkinson disease|Cocaine addiction|Amphetamine addiction|Alcoholism	solute carrier family 18 (vesicular monoamine), member 1	up
Fscn2	2.26193	0.000394497	0.00126026	20	19	24	7	4	3	ENSMUSG00000025380	238021	11	120361534	120368168	+	GO:0007015|actin filament organization;GO:0030036|actin cytoskeleton organization;GO:0042462|eye photoreceptor cell development	NA	NA	K17455|fascin 1/2	NA	NA	fascin actin-bundling protein 2	up
Smtnl2	4.42453	1.13e-05	4.38e-05	22	19	21	0	0	3	ENSMUSG00000045667	276829	11	72389164	72411713	-	NA	GO:0003674|molecular_function	NA	NA|(RefSeq) smoothelin-like 2	NA	NA	smoothelin-like 2	up
Spon2	-4.57459	6.01e-69	2.99e-67	16	17	12	447	323	364	ENSMUSG00000037379	100689	5	33198184	33218455	-	GO:0002376|immune system process;GO:0002448|mast cell mediated immunity;GO:0007155|cell adhesion;GO:0008228|opsonization;GO:0032496|response to lipopolysaccharide;GO:0032755|positive regulation of interleukin-6 production;GO:0032760|positive regulation of	NA	NA	NA|(RefSeq) spondin 2, extracellular matrix protein	NA	NA	spondin 2, extracellular matrix protein	down
Acot12	4.07408	0.00155438	0.00448377	12	12	8	0	2	0	ENSMUSG00000021620	74156	13	91741512	91786148	+	GO:0006084|acetyl-CoA metabolic process;GO:0006090|pyruvate metabolic process;GO:0006629|lipid metabolic process;GO:0006631|fatty acid metabolic process;GO:0006637|acyl-CoA metabolic process	NA	NA	K01067|acetyl-CoA hydrolase [EC:3.1.2.1]	mmu00620	Pyruvate metabolism	acyl-CoA thioesterase 12	up
Itga11	-2.44021	0.000158557	0.000535498	6	6	1	32	23	20	ENSMUSG00000032243	319480	9	62677826	62783982	+	GO:0006929|substrate-dependent cell migration;GO:0007155|cell adhesion;GO:0007160|cell-matrix adhesion;GO:0007229|integrin-mediated signaling pathway;GO:0033627|cell adhesion mediated by integrin;GO:0038065|collagen-activated signaling pathway	NA	NA	K06587|integrin alpha 11	mmu04151|mmu04510|mmu04512|mmu04810|mmu05165|mmu05410|mmu05412|mmu05414	PI3K-Akt signaling pathway|Focal adhesion|ECM-receptor interaction|Regulation of actin cytoskeleton|Human papillomavirus infection|Hypertrophic cardiomyopathy (HCM)|Arrhythmogenic right ventricular cardiomyopathy (ARVC)|Dilated cardiomyopathy (DCM)	integrin alpha 11	down
Cacng7	-3.3576	2.19e-27	3.32e-26	8	15	19	155	155	144	ENSMUSG00000069806	81904	7	3332955	3368221	+	GO:0006811|ion transport;GO:0006816|calcium ion transport;GO:0034765|regulation of ion transmembrane transport;GO:0043488|regulation of mRNA stability;GO:0070588|calcium ion transmembrane transport;GO:1903861|positive regulation of dendrite extension;GO:2	NA	NA	K04872|voltage-dependent calcium channel gamma-7	mmu04010|mmu04260|mmu04261|mmu04921|mmu05410|mmu05412|mmu05414	MAPK signaling pathway|Cardiac muscle contraction|Adrenergic signaling in cardiomyocytes|Oxytocin signaling pathway|Hypertrophic cardiomyopathy (HCM)|Arrhythmogenic right ventricular cardiomyopathy (ARVC)|Dilated cardiomyopathy (DCM)	calcium channel, voltage-dependent, gamma subunit 7	down
Slc17a9	2.69605	4.53e-11	2.85e-10	68	57	53	11	9	9	ENSMUSG00000023393	228993	2	180725263	180742280	+	GO:0006887|exocytosis;GO:0055085|transmembrane transport	NA	NA	K12303|MFS transporter, ACS family, solute carrier family 17 (sodium-dependent inorganic phosphate cotransporter), member 9	NA	NA	solute carrier family 17, member 9	up
Slc17a7	2.6936	0.00167742	0.00481064	19	17	7	3	1	3	ENSMUSG00000070570	72961	7	45163949	45176142	+	GO:0003407|neural retina development;GO:0006811|ion transport;GO:0006814|sodium ion transport;GO:0006817|phosphate ion transport;GO:0006836|neurotransmitter transport;GO:0007268|chemical synaptic transmission;GO:0007420|brain development;GO:0007616|long-t	NA	NA	K12302|MFS transporter, ACS family, solute carrier family 17 (sodium-dependent inorganic phosphate cotransporter), member 6/7/8	mmu04721|mmu04723|mmu04724|mmu05033	Synaptic vesicle cycle|Retrograde endocannabinoid signaling|Glutamatergic synapse|Nicotine addiction	solute carrier family 17 (sodium-dependent inorganic phosphate cotransporter), member 7	up
2310034O05Rik	6.84202	2.25e-07	1.05e-06	15	19	26	0	0	0	ENSMUSG00000100157	69571	5	100210692	100218049	+	NA	NA	NA	NA|(RefSeq) RIKEN cDNA 2310034O05 gene	NA	NA	RIKEN cDNA 2310034O05 gene	up
Ctso	2.31959	3.05e-35	6.3e-34	298	247	251	59	52	57	ENSMUSG00000028015	229445	3	81932601	81956725	+	GO:0006508|proteolysis	NA	NA	K01374|cathepsin O [EC:3.4.22.42]	mmu04142|mmu04210	Lysosome|Apoptosis	cathepsin O	up
Gp1ba	2.58472	2.01e-09	1.12e-08	49	62	57	17	8	5	ENSMUSG00000050675	14723	11	70639122	70642036	+	GO:0000902|cell morphogenesis;GO:0007155|cell adhesion;GO:0007596|blood coagulation;GO:0007599|hemostasis;GO:0042730|fibrinolysis;GO:0070527|platelet aggregation	NA	NA	K06261|platelet glycoprotein Ib alpha chain	mmu04512|mmu04611|mmu04640	ECM-receptor interaction|Platelet activation|Hematopoietic cell lineage	glycoprotein 1b, alpha polypeptide	up
Cxcr2	5.51882	0.000240543	0.000792151	7	7	10	0	0	0	ENSMUSG00000026180	12765	1	74153989	74161246	+	GO:0002438|acute inflammatory response to antigenic stimulus;GO:0002690|positive regulation of leukocyte chemotaxis;GO:0006935|chemotaxis;GO:0006968|cellular defense response;GO:0007165|signal transduction;GO:0007166|cell surface receptor signaling pathwa	NA	NA	K05050|C-X-C chemokine receptor type 2	mmu04060|mmu04062|mmu04072|mmu04144|mmu05163	Cytokine-cytokine receptor interaction|Chemokine signaling pathway|Phospholipase D signaling pathway|Endocytosis|Human cytomegalovirus infection	chemokine (C-X-C motif) receptor 2	up
Cdc42ep2	-2.06389	1.68e-75	9.8e-74	163	201	188	851	838	747	ENSMUSG00000045664	104252	19	5917556	5924816	-	GO:0008360|regulation of cell shape;GO:0010469|regulation of signaling receptor activity;GO:0030036|actin cytoskeleton organization;GO:0030838|positive regulation of actin filament polymerization;GO:0031274|positive regulation of pseudopodium assembly;GO:	NA	NA	NA|(RefSeq) CDC42 effector protein (Rho GTPase binding) 2	NA	NA	CDC42 effector protein (Rho GTPase binding) 2	down
Cdc42ep5	-5.33896	0.000104376	0.000362213	1	0	0	24	16	7	ENSMUSG00000063838	58804	7	4151260	4164860	-	GO:0007254|JNK cascade;GO:0007266|Rho protein signal transduction;GO:0008360|regulation of cell shape;GO:0030838|positive regulation of actin filament polymerization;GO:0031274|positive regulation of pseudopodium assembly	NA	NA	NA|(RefSeq) CDC42 effector protein (Rho GTPase binding) 5	NA	NA	CDC42 effector protein (Rho GTPase binding) 5	down
Creb3l1	-3.56164	7.48e-10	4.3e-09	3	6	2	57	42	39	ENSMUSG00000027230	26427	2	91982328	92024502	-	GO:0000122|negative regulation of transcription by RNA polymerase II;GO:0006355|regulation of transcription, DNA-templated;GO:0010629|negative regulation of gene expression;GO:0030968|endoplasmic reticulum unfolded protein response;GO:0032967|positive reg	NA	NA	K09048|cyclic AMP-responsive element-binding protein 3	mmu04022|mmu04024|mmu04151|mmu04152|mmu04211|mmu04261|mmu04668|mmu04714|mmu04725|mmu04728|mmu04911|mmu04915|mmu04916|mmu04918|mmu04922|mmu04925|mmu04926|mmu04927|mmu04928|mmu04931|mmu04934|mmu04962|mmu05016|mmu05030|mmu05031|mmu05034|mmu05161|mmu05163|mmu	cGMP-PKG signaling pathway|cAMP signaling pathway|PI3K-Akt signaling pathway|AMPK signaling pathway|Longevity regulating pathway|Adrenergic signaling in cardiomyocytes|TNF signaling pathway|Thermogenesis|Cholinergic synapse|Dopaminergic synapse|Insulin se	cAMP responsive element binding protein 3-like 1	down
Itgbl1	-2.18183	2.1e-57	8.06e-56	114	103	98	533	499	475	ENSMUSG00000032925	223272	14	123659971	123975618	+	NA	NA	GO:0005576|extracellular region;GO:0005615|extracellular space	NA|(RefSeq) integrin, beta-like 1	NA	NA	integrin, beta-like 1	down
Tcf15	5.02192	0.00190587	0.00541752	5	7	5	0	0	0	ENSMUSG00000068079	21407	2	152143561	152149097	+	GO:0001756|somitogenesis;GO:0003016|respiratory system process;GO:0007275|multicellular organism development;GO:0007517|muscle organ development;GO:0009952|anterior/posterior pattern specification;GO:0010468|regulation of gene expression;GO:0036342|post-a	NA	NA	K09070|transcription factor 15	NA	NA	transcription factor 15	up
Cul9	2.49333	0.000592584	0.00183617	25	19	16	0	6	5	ENSMUSG00000040327	78309	17	46500572	46546388	-	GO:0000226|microtubule cytoskeleton organization;GO:0006511|ubiquitin-dependent protein catabolic process;GO:0007088|regulation of mitotic nuclear division;GO:0016567|protein ubiquitination	NA	NA	K11970|cullin 9	NA	NA	cullin 9	up
Tcea2	-2.97254	0.000512042	0.00160543	1	4	1	21	13	16	ENSMUSG00000059540	21400	2	181680310	181688071	+	GO:0006351|transcription, DNA-templated;GO:0006355|regulation of transcription, DNA-templated;GO:0006414|translational elongation;GO:0045944|positive regulation of transcription by RNA polymerase II	NA	NA	K03145|transcription elongation factor S-II	NA	NA	transcription elongation factor A (SII), 2	down
Usp17ld	4.85907	1.39e-12	9.81e-12	62	55	48	3	0	3	ENSMUSG00000057321	384701	7	103249737	103252505	-	GO:0006508|proteolysis;GO:0006511|ubiquitin-dependent protein catabolic process;GO:0016579|protein deubiquitination	NA	NA	K11845|ubiquitin carboxyl-terminal hydrolase 17 [EC:3.4.19.12]	NA	NA	ubiquitin specific peptidase 17-like D	up
Usp17le	-2.54584	1.28e-14	1.02e-13	23	12	19	159	96	82	ENSMUSG00000043073	625530	7	104768049	104777470	-	GO:0006511|ubiquitin-dependent protein catabolic process;GO:0016579|protein deubiquitination	NA	NA	K11845|ubiquitin carboxyl-terminal hydrolase 17 [EC:3.4.19.12]	NA	NA	ubiquitin specific peptidase 17-like E	down
Cox6a2	-3.61744	3.54e-12	2.43e-11	4	7	3	61	78	43	ENSMUSG00000030785	12862	7	128205435	128206387	-	GO:0050790|regulation of catalytic activity;GO:1902600|proton transmembrane transport	NA	NA	K02266|cytochrome c oxidase subunit 6a	mmu00190|mmu01100|mmu04260|mmu04714|mmu04932|mmu05010|mmu05012|mmu05016	Oxidative phosphorylation|Metabolic pathways|Cardiac muscle contraction|Thermogenesis|Non-alcoholic fatty liver disease (NAFLD)|Alzheimer disease|Parkinson disease|Huntington disease	cytochrome c oxidase subunit 6A2	down
B130024G19Rik	-2.15187	1.22e-12	8.66e-12	27	25	15	125	109	82	ENSMUSG00000100005	434198	7	70364910	70489972	+	NA	NA	NA	NA|(RefSeq) RIKEN cDNA B130024G19 gene	NA	NA	RIKEN cDNA B130024G19 gene	down
Rufy4	2.84547	0.00297291	0.00813775	8	13	13	2	1	2	ENSMUSG00000061815	435626	1	74125541	74148223	+	GO:0000045|autophagosome assembly;GO:0006914|autophagy;GO:0016239|positive regulation of macroautophagy;GO:0071353|cellular response to interleukin-4	NA	NA	NA|(RefSeq) RUN and FYVE domain containing 4	NA	NA	RUN and FYVE domain containing 4	up
Scml4	5.05538	0.00032129	0.00103909	15	9	10	0	1	0	ENSMUSG00000044770	268297	10	42860370	42960780	+	GO:0008150|biological_process	NA	NA	K11466|sex comb on midleg-like protein 4	NA	NA	Scm polycomb group protein like 4	up
Spta1	5.0183	0.0029687	0.00812739	6	1	10	0	0	0	ENSMUSG00000026532	20739	1	174172776	174248450	+	GO:0002260|lymphocyte homeostasis;GO:0006779|porphyrin-containing compound biosynthetic process;GO:0007009|plasma membrane organization;GO:0008360|regulation of cell shape;GO:0030036|actin cytoskeleton organization;GO:0030097|hemopoiesis;GO:0032092|positi	NA	NA	K06114|spectrin alpha	mmu04210	Apoptosis	spectrin alpha, erythrocytic 1	up
Gm35048	-2.62748	0.000328105	0.00105901	2	5	2	23	19	17	ENSMUSG00000103292	NA	1	90520496	90523297	+	NA	NA	NA	NA	NA	NA	predicted gene, 35048	down
Kctd15	-2.12271	1.48e-52	5.15e-51	96	118	111	571	474	453	ENSMUSG00000030499	233107	7	34639014	34656732	-	GO:0007275|multicellular organism development;GO:0008150|biological_process;GO:0051260|protein homooligomerization	NA	NA	K21754|BTB/POZ domain-containing protein KCTD1/15	NA	NA	potassium channel tetramerisation domain containing 15	down
Hes1	2.57521	8.04e-15	6.53e-14	83	113	80	18	17	14	ENSMUSG00000022528	15205	16	30064384	30067796	+	GO:0000122|negative regulation of transcription by RNA polymerase II;GO:0001701|in utero embryonic development;GO:0001889|liver development;GO:0003143|embryonic heart tube morphogenesis;GO:0003151|outflow tract morphogenesis;GO:0003266|regulation of secon	NA	NA	K06054|hairy and enhancer of split 1	mmu03460|mmu04330|mmu04950|mmu05165|mmu05169|mmu05200|mmu05224	Fanconi anemia pathway|Notch signaling pathway|Maturity onset diabetes of the young|Human papillomavirus infection|Epstein-Barr virus infection|Pathways in cancer|Breast cancer	hes family bHLH transcription factor 1	up
Galr2	2.29214	1.14e-14	9.2e-14	111	104	90	29	18	19	ENSMUSG00000020793	14428	11	116280939	116283938	+	GO:0007165|signal transduction;GO:0007186|G protein-coupled receptor signaling pathway;GO:0007189|adenylate cyclase-activating G protein-coupled receptor signaling pathway;GO:0007194|negative regulation of adenylate cyclase activity;GO:0007200|phospholipa	NA	NA	K04231|galanin receptor 2	mmu04080	Neuroactive ligand-receptor interaction	galanin receptor 2	up
Tnfrsf21	-2.47904	2.45e-05	9.17e-05	4	5	6	33	21	34	ENSMUSG00000023915	94185	17	43016555	43089188	+	GO:0001783|B cell apoptotic process;GO:0002250|adaptive immune response;GO:0002376|immune system process;GO:0006915|apoptotic process;GO:0006959|humoral immune response;GO:0007165|signal transduction;GO:0007413|axonal fasciculation;GO:0030889|negative reg	NA	NA	K05157|tumor necrosis factor receptor superfamily member 21	mmu04060	Cytokine-cytokine receptor interaction	tumor necrosis factor receptor superfamily, member 21	down
Col23a1	2.44843	0.00050129	0.00157478	21	17	23	6	6	0	ENSMUSG00000063564	237759	11	51289920	51583918	+	GO:0070207|protein homotrimerization	NA	NA	NA|(RefSeq) collagen, type XXIII, alpha 1	NA	NA	collagen, type XXIII, alpha 1	up
Ms4a6d	5.63609	0.000157371	0.000531586	7	13	6	0	0	0	ENSMUSG00000024679	68774	19	11586604	11604849	-	NA	NA	GO:0016020|membrane;GO:0016021|integral component of membrane	K22191|membrane-spanning 4-domains subfamily A member 5/6/7	NA	NA	membrane-spanning 4-domains, subfamily A, member 6D	up
A730056A06Rik	-3.52249	2.3e-08	1.18e-07	0	5	5	34	52	35	ENSMUSG00000097756	319783	7	73314003	73375774	-	NA	NA	NA	NA|(RefSeq) RIKEN cDNA A730056A06 gene	NA	NA	RIKEN cDNA A730056A06 gene	down
Slfn8	2.30129	1.1e-06	4.83e-06	40	36	41	7	11	7	ENSMUSG00000035208	276950	11	83002158	83020810	-	GO:0002376|immune system process;GO:0016075|rRNA catabolic process;GO:0016078|tRNA catabolic process;GO:0090305|nucleic acid phosphodiester bond hydrolysis;GO:0090502|RNA phosphodiester bond hydrolysis, endonucleolytic	NA	NA	NA|(RefSeq) schlafen 8	NA	NA	schlafen 8	up
Slfn2	4.30147	0.000690642	0.00211926	8	9	20	1	1	0	ENSMUSG00000072620	20556	11	83065112	83070678	+	GO:0008285|negative regulation of cell population proliferation;GO:0009617|response to bacterium	NA	NA	NA|(RefSeq) schlafen 2	NA	NA	schlafen 2	up
Scn3a	-4.25486	9.93e-35	2.01e-33	13	9	6	160	204	195	ENSMUSG00000057182	20269	2	65457118	65567627	-	GO:0006811|ion transport;GO:0006814|sodium ion transport;GO:0019228|neuronal action potential;GO:0019233|sensory perception of pain;GO:0034220|ion transmembrane transport;GO:0034765|regulation of ion transmembrane transport;GO:0046684|response to pyrethro	NA	NA	K04836|voltage-gated sodium channel type III alpha	mmu04742	Taste transduction	sodium channel, voltage-gated, type III, alpha	down
Gm49396	-3.88911	0.00342243	0.00927093	2	0	0	18	9	5	ENSMUSG00000109378	NA	7	30563344	30567960	+	GO:0000398|mRNA splicing, via spliceosome;GO:0006397|mRNA processing;GO:0008380|RNA splicing;GO:0048511|rhythmic process	NA	NA	NA	NA	NA	predicted gene, 49396	down
Gm49376	2.32587	3.32e-06	1.38e-05	39	39	41	11	2	12	ENSMUSG00000112368	NA	12	55275381	55278714	+	NA	NA	NA	NA	NA	NA	predicted gene, 49376	up
Olfml3	-2.73834	1.24e-35	2.62e-34	38	38	25	272	229	212	ENSMUSG00000027848	99543	3	103722222	103738001	-	NA	NA	NA	NA|(RefSeq) olfactomedin-like 3	NA	NA	olfactomedin-like 3	down
Slit1	3.08612	0.00111401	0.00329979	16	15	10	1	0	4	ENSMUSG00000025020	20562	19	41600257	41743665	-	GO:0007097|nuclear migration;GO:0007275|multicellular organism development;GO:0007399|nervous system development;GO:0007409|axonogenesis;GO:0007411|axon guidance;GO:0008045|motor neuron axon guidance;GO:0021772|olfactory bulb development;GO:0022028|tangen	NA	NA	K06838|slit 1	mmu04360	Axon guidance	slit guidance ligand 1	up
Pde4b	-2.06241	1.55e-29	2.54e-28	62	70	55	282	295	247	ENSMUSG00000028525	18578	4	102087543	102607259	+	GO:0001780|neutrophil homeostasis;GO:0007165|signal transduction;GO:0009408|response to heat;GO:0030593|neutrophil chemotaxis;GO:0032729|positive regulation of interferon-gamma production;GO:0032743|positive regulation of interleukin-2 production;GO:00356	NA	NA	K13293|cAMP-specific phosphodiesterase 4 [EC:3.1.4.53]	mmu00230|mmu04024|mmu04928|mmu05032	Purine metabolism|cAMP signaling pathway|Parathyroid hormone synthesis, secretion and action|Morphine addiction	phosphodiesterase 4B, cAMP specific	down
Mmp24	2.3749	0.000720093	0.00219914	17	12	30	5	2	5	ENSMUSG00000027612	17391	2	155775342	155818366	+	GO:0006508|proteolysis;GO:0007155|cell adhesion;GO:0010001|glial cell differentiation;GO:0044331|cell-cell adhesion mediated by cadherin;GO:0050965|detection of temperature stimulus involved in sensory perception of pain;GO:0097150|neuronal stem cell popu	NA	NA	K08002|matrix metalloproteinase-24 (membrane-inserted) [EC:3.4.24.-]	mmu04928	Parathyroid hormone synthesis, secretion and action	matrix metallopeptidase 24	up
Mmp15	4.43188	0.00326318	0.00887066	6	6	10	0	0	1	ENSMUSG00000031790	17388	8	95352268	95375080	+	GO:0006508|proteolysis;GO:0032355|response to estradiol;GO:0035987|endodermal cell differentiation	NA	NA	K07995|matrix metalloproteinase-15 (membrane-inserted) [EC:3.4.24.-]	mmu04928	Parathyroid hormone synthesis, secretion and action	matrix metallopeptidase 15	up
Mmp19	-2.07805	1.96e-09	1.09e-08	21	20	11	81	88	63	ENSMUSG00000025355	58223	10	128790910	128800824	+	GO:0001525|angiogenesis;GO:0001541|ovarian follicle development;GO:0001542|ovulation from ovarian follicle;GO:0001554|luteolysis;GO:0006508|proteolysis;GO:0007275|multicellular organism development;GO:0009725|response to hormone;GO:0030154|cell differenti	NA	NA	K07998|matrix metalloproteinase-19 (RASI) [EC:3.4.24.-]	NA	NA	matrix metallopeptidase 19	down
Tgtp2	-2.32779	2.83e-12	1.96e-11	17	17	18	96	72	106	ENSMUSG00000078921	100039796	11	49057194	49064206	-	GO:0002376|immune system process;GO:0006955|immune response;GO:0009615|response to virus;GO:0009617|response to bacterium;GO:0034341|response to interferon-gamma;GO:0035455|response to interferon-alpha;GO:0035458|cellular response to interferon-beta;GO:00	NA	NA	NA|(RefSeq) T cell specific GTPase 2	NA	NA	T cell specific GTPase 2	down
Synpo	-2.24632	8.14e-60	3.33e-58	138	131	165	901	599	683	ENSMUSG00000043079	104027	18	60593973	60660142	-	GO:0008542|visual learning;GO:0030865|cortical cytoskeleton organization;GO:0032233|positive regulation of actin filament bundle assembly;GO:0048169|regulation of long-term neuronal synaptic plasticity;GO:0098886|modification of dendritic spine;GO:1905355	NA	NA	K21112|synaptopodin	mmu04530	Tight junction	synaptopodin	down
Gm11413	4.55724	0.00204545	0.0057819	7	8	9	0	0	1	ENSMUSG00000086321	790913	4	83378317	83390668	-	NA	NA	NA	NA|(RefSeq) predicted gene 11413	NA	NA	predicted gene 11413	up
Pcolce	-2.07197	0	0	1590	1702	1556	7979	6934	6629	ENSMUSG00000029718	18542	5	137605103	137613784	-	GO:0006508|proteolysis;GO:0010952|positive regulation of peptidase activity;GO:1990830|cellular response to leukemia inhibitory factor	NA	NA	NA|(RefSeq) procollagen C-endopeptidase enhancer protein	NA	NA	procollagen C-endopeptidase enhancer protein	down
B4galnt1	-2.60503	0.00070963	0.00217062	3	3	3	27	25	7	ENSMUSG00000006731	14421	10	127165225	127172330	+	GO:0001574|ganglioside biosynthetic process;GO:0006629|lipid metabolic process;GO:0006665|sphingolipid metabolic process;GO:0006687|glycosphingolipid metabolic process;GO:0007283|spermatogenesis;GO:0019915|lipid storage;GO:0030259|lipid glycosylation	NA	NA	K00725|(N-Acetylneuraminyl)-galactosylglucosylceramide N-acetylgalactosaminyltransferase [EC:2.4.1.92]	mmu00604|mmu01100	Glycosphingolipid biosynthesis - ganglio series|Metabolic pathways	beta-1,4-N-acetyl-galactosaminyl transferase 1	down
Gm35507	2.39987	0.000180489	0.000605435	31	21	24	1	10	4	ENSMUSG00000105102	102639119	3	106827307	106879361	-	NA	NA	NA	NA|(RefSeq) predicted gene, 35507	NA	NA	predicted gene, 35507	up
Olfr96	5.38853	0.000449302	0.00142002	10	5	7	0	0	0	ENSMUSG00000064121	258507	17	37220146	37226673	+	GO:0007165|signal transduction;GO:0007186|G protein-coupled receptor signaling pathway;GO:0007608|sensory perception of smell;GO:0050896|response to stimulus;GO:0050911|detection of chemical stimulus involved in sensory perception of smell	NA	NA	K04257|olfactory receptor	mmu04740	Olfactory transduction	olfactory receptor 96	up
Ly6f	5.68906	0.000106054	0.000367703	8	10	9	0	0	0	ENSMUSG00000022583	17071	15	75268421	75272235	+	GO:0008150|biological_process	NA	NA	NA|(RefSeq) lymphocyte antigen 6 complex, locus F	NA	NA	lymphocyte antigen 6 complex, locus F	up
Ly6a	-4.51691	1.35e-247	5.65e-245	56	67	65	1731	1355	1462	ENSMUSG00000075602	110454	15	74994877	74998031	-	GO:0009617|response to bacterium	NA	NA	K06846|lymphocyte antigen 6 complex locus protein D/E/G6/H	NA	NA	lymphocyte antigen 6 complex, locus A	down
Slc12a3	4.93208	0.00267736	0.00738636	6	6	4	0	0	0	ENSMUSG00000031766	20497	8	94329201	94366214	+	GO:0006811|ion transport;GO:0006814|sodium ion transport;GO:0006821|chloride transport;GO:0035725|sodium ion transmembrane transport;GO:0055085|transmembrane transport;GO:1902476|chloride transmembrane transport	NA	NA	K14426|solute carrier family 12 (sodium/chloride transporter), member 3	NA	NA	solute carrier family 12, member 3	up
AC162302.2	-2.47754	3.33e-16	2.91e-15	21	17	18	132	111	88	ENSMUSG00000116305	NA	15	85653616	85707524	+	NA	NA	NA	NA	NA	NA	long noncoding RNA near Ppara	down
Vcam1	-2.13556	3.93e-189	1.02e-186	456	445	457	2303	1994	2001	ENSMUSG00000027962	22329	3	116109949	116129688	-	GO:0001666|response to hypoxia;GO:0002526|acute inflammatory response;GO:0002544|chronic inflammatory response;GO:0007155|cell adhesion;GO:0007157|heterophilic cell-cell adhesion via plasma membrane cell adhesion molecules;GO:0007159|leukocyte cell-cell a	NA	NA	K06527|vascular cell adhesion molecule 1	mmu04064|mmu04514|mmu04668|mmu04670|mmu04933|mmu05143|mmu05144|mmu05166|mmu05418	NF-kappa B signaling pathway|Cell adhesion molecules (CAMs)|TNF signaling pathway|Leukocyte transendothelial migration|AGE-RAGE signaling pathway in diabetic complications|African trypanosomiasis|Malaria|Human T-cell leukemia virus 1 infection|Fluid shear	vascular cell adhesion molecule 1	down
Wincr1	-2.63211	8.47e-50	2.75e-48	56	55	73	381	397	419	ENSMUSG00000085183	100040617	4	89050308	89084614	+	NA	NA	NA	NA|(RefSeq) WNT induced non-coding RNA 1	NA	NA	WNT induced non-coding RNA 1	down
Olfr55	3.77599	0.00044439	0.00140541	15	10	14	1	1	1	ENSMUSG00000094891	100038859	17	33168447	33180753	+	GO:0007165|signal transduction;GO:0007186|G protein-coupled receptor signaling pathway;GO:0007608|sensory perception of smell;GO:0050896|response to stimulus;GO:0050911|detection of chemical stimulus involved in sensory perception of smell;GO:0098664|G pr	NA	NA	K04257|olfactory receptor	mmu04740	Olfactory transduction	olfactory receptor 55	up
Efna4	-2.10968	2.72e-11	1.74e-10	27	17	17	101	80	96	ENSMUSG00000028040	13639	3	89333390	89338028	-	GO:0048013|ephrin receptor signaling pathway	NA	NA	K05462|ephrin-A	mmu04010|mmu04014|mmu04015|mmu04151|mmu04360	MAPK signaling pathway|Ras signaling pathway|Rap1 signaling pathway|PI3K-Akt signaling pathway|Axon guidance	ephrin A4	down
Map3k15	2.20056	0.000496642	0.00156069	38	20	18	2	5	10	ENSMUSG00000031303	270672	X	159988433	160123351	+	GO:0000165|MAPK cascade;GO:0006468|protein phosphorylation;GO:0016310|phosphorylation	NA	NA	K13986|mitogen-activated protein kinase kinase kinase 15 [EC:2.7.11.25]	NA	NA	mitogen-activated protein kinase kinase kinase 15	up
Map3k13	2.11461	2.67e-11	1.71e-10	100	81	76	27	22	14	ENSMUSG00000033618	71751	16	21794346	21933439	+	GO:0000186|activation of MAPKK activity;GO:0006468|protein phosphorylation;GO:0007254|JNK cascade;GO:0007256|activation of JNKK activity;GO:0007257|activation of JUN kinase activity;GO:0014042|positive regulation of neuron maturation;GO:0016310|phosphoryl	NA	NA	K04422|mitogen-activated protein kinase kinase kinase 13 [EC:2.7.11.25]	mmu04010	MAPK signaling pathway	mitogen-activated protein kinase kinase kinase 13	up
Lyz2	2.79186	1.1e-36	2.41e-35	218	260	214	46	31	29	ENSMUSG00000069516	17105	10	117277331	117282321	-	GO:0008152|metabolic process;GO:0019835|cytolysis;GO:0042742|defense response to bacterium;GO:0050829|defense response to Gram-negative bacterium;GO:0050830|defense response to Gram-positive bacterium	NA	NA	K13915|lysozyme C [EC:3.2.1.17]	mmu04970	Salivary secretion	lysozyme 2	up
Gm3830	-2.14595	0.00337552	0.00915155	5	2	4	26	12	14	ENSMUSG00000099465	NA	8	105164587	105170367	+	NA	NA	NA	NA	NA	NA	predicted gene 3830	down
Gm15433	3.89805	0.000287944	0.000938005	11	18	13	2	0	1	ENSMUSG00000096802	NA	1	84963669	84964559	+	NA	NA	NA	NA	NA	NA	predicted pseudogene 15433	up
A4galt	-4.42705	0.00348073	0.00941035	0	0	1	15	4	6	ENSMUSG00000047878	239559	15	83226722	83251774	-	GO:0001576|globoside biosynthetic process;GO:0006486|protein glycosylation;GO:0006629|lipid metabolic process;GO:0007009|plasma membrane organization	NA	NA	K01988|lactosylceramide 4-alpha-galactosyltransferase [EC:2.4.1.228]	mmu00601|mmu00603|mmu01100	Glycosphingolipid biosynthesis - lacto and neolacto series|Glycosphingolipid biosynthesis - globo and isoglobo series|Metabolic pathways	alpha 1,4-galactosyltransferase	down
Gm39473	2.08402	8.54e-06	3.37e-05	35	42	35	10	12	6	ENSMUSG00000113845	NA	12	74825345	74827722	+	NA	NA	NA	NA	NA	NA	predicted gene, 39473	up
Tubb3	-2.63421	8.4e-70	4.27e-68	72	82	73	525	516	447	ENSMUSG00000062380	22152	8	123411424	123422015	+	GO:0000278|mitotic cell cycle;GO:0007010|cytoskeleton organization;GO:0007017|microtubule-based process;GO:0007411|axon guidance;GO:0030182|neuron differentiation	NA	NA	K07375|tubulin beta	mmu04145|mmu04540	Phagosome|Gap junction	tubulin, beta 3 class III	down
Dbn1	-2.21883	5.27e-58	2.05e-56	108	136	104	670	563	485	ENSMUSG00000034675	56320	13	55473429	55488111	-	GO:0007015|actin filament organization;GO:0007275|multicellular organism development;GO:0007399|nervous system development;GO:0010643|cell communication by chemical coupling;GO:0010644|cell communication by electrical coupling;GO:0010811|positive regulati	NA	NA	NA|(RefSeq) drebrin 1	NA	NA	drebrin 1	down
Erich3	4.93004	0.00273034	0.00752073	7	5	4	0	0	0	ENSMUSG00000078161	209601	3	154663859	154767790	+	GO:0008150|biological_process	NA	NA	NA|(RefSeq) glutamate rich 3	NA	NA	glutamate rich 3	up
AC130815.2	2.36108	1.81e-06	7.76e-06	46	37	30	6	7	10	ENSMUSG00000116617	NA	16	31284424	31291896	-	NA	NA	NA	NA	NA	NA	novel transcript	up
Dctd	-2.57287	8.79e-43	2.34e-41	49	43	49	318	287	280	ENSMUSG00000031562	320685	8	48099092	48153233	+	GO:0006220|pyrimidine nucleotide metabolic process	NA	NA	K01493|dCMP deaminase [EC:3.5.4.12]	mmu00240|mmu01100	Pyrimidine metabolism|Metabolic pathways	dCMP deaminase	down
Krt88	-6.42684	2.92e-06	1.22e-05	0	0	0	8	21	20	ENSMUSG00000063971	66322	15	101447744	101453907	+	GO:0008150|biological_process	NA	NA	NA|(RefSeq) keratin 88	NA	NA	keratin 88	down
Krt86	-6.253	6.12e-06	2.46e-05	0	0	0	10	21	13	ENSMUSG00000067614	16679	15	101473478	101479986	+	NA	NA	GO:0005882|intermediate filament;GO:0045095|keratin filament	K07605|type II keratin, basic	NA	NA	keratin 86	down
Gm15261	6.06514	1.78e-05	6.78e-05	8	12	15	0	0	0	ENSMUSG00000087201	NA	X	169037674	169106536	-	NA	NA	NA	NA	NA	NA	predicted gene 15261	up
Srrm4os	2.84974	3.95e-07	1.81e-06	43	25	35	4	6	5	ENSMUSG00000086219	76798	5	116438720	116465487	+	NA	NA	NA	NA|(RefSeq) serine/arginine repetitive matrix 4, opposite strand	NA	NA	serine/arginine repetitive matrix 4, opposite strand	up
Thap8	3.88163	0.00325407	0.00884839	10	11	7	0	2	0	ENSMUSG00000013928	NA	7	30280094	30290237	+	GO:0008150|biological_process	NA	NA	NA	NA	NA	THAP domain containing 8	up
Ptprz1	5.39102	0.000523352	0.00163637	9	10	3	0	0	0	ENSMUSG00000068748	19283	6	22875502	23052916	+	GO:0002244|hematopoietic progenitor cell differentiation;GO:0006470|protein dephosphorylation;GO:0007409|axonogenesis;GO:0007413|axonal fasciculation;GO:0007611|learning or memory;GO:0008285|negative regulation of cell population proliferation;GO:0010812|	NA	NA	K08114|receptor-type tyrosine-protein phosphatase zeta [EC:3.1.3.48]	NA	NA	protein tyrosine phosphatase, receptor type Z, polypeptide 1	up
Dennd2d	-2.86702	0.00130882	0.00382981	2	4	0	22	16	9	ENSMUSG00000027901	72121	3	106482405	106503030	+	NA	NA	GO:0005654|nucleoplasm;GO:0005737|cytoplasm;GO:0005829|cytosol	K20161|DENN domain-containing protein 2	NA	NA	DENN/MADD domain containing 2D	down
Rap1gap2	4.92371	0.000522156	0.00163368	12	9	10	0	0	1	ENSMUSG00000038807	380711	11	74383356	74610915	-	GO:0008361|regulation of cell size;GO:0010977|negative regulation of neuron projection development;GO:0043547|positive regulation of GTPase activity;GO:0051056|regulation of small GTPase mediated signal transduction	NA	NA	K17708|RAP1 GTPase activating protein 2	NA	NA	RAP1 GTPase activating protein 2	up
Gm49319	-5.31728	0.000110622	0.000382099	0	0	1	20	19	7	ENSMUSG00000115781	NA	14	46528176	46637408	-	NA	NA	NA	NA	NA	NA	predicted gene, 49319	down
Dgki	-2.64267	1.07e-05	4.17e-05	7	1	6	33	29	30	ENSMUSG00000038665	320127	6	36846022	37300184	-	GO:0007165|signal transduction;GO:0007205|protein kinase C-activating G protein-coupled receptor signaling pathway;GO:0007269|neurotransmitter secretion;GO:0016310|phosphorylation;GO:0034260|negative regulation of GTPase activity;GO:0035556|intracellular	NA	NA	K00901|diacylglycerol kinase (ATP) [EC:2.7.1.107]	mmu00561|mmu00564|mmu01100|mmu04070|mmu04072|mmu05231	Glycerolipid metabolism|Glycerophospholipid metabolism|Metabolic pathways|Phosphatidylinositol signaling system|Phospholipase D signaling pathway|Choline metabolism in cancer	diacylglycerol kinase, iota	down
C430049B03Rik	-2.25449	7.59e-36	1.61e-34	83	56	83	337	396	377	ENSMUSG00000087365	NA	X	53055046	53057190	-	NA	NA	NA	NA	NA	NA	RIKEN cDNA C430049B03 gene	down
Accsl	-2.55354	0.00109489	0.00324915	7	1	1	15	21	19	ENSMUSG00000075023	381411	2	93855361	93869157	-	GO:0008150|biological_process;GO:0009058|biosynthetic process	NA	NA	NA|(RefSeq) 1-aminocyclopropane-1-carboxylate synthase (non-functional)-like	NA	NA	1-aminocyclopropane-1-carboxylate synthase (non-functional)-like	down
Medag	-4.57311	1.46e-83	1.01e-81	13	22	18	499	443	393	ENSMUSG00000029659	70717	5	149411749	149431723	+	GO:0045600|positive regulation of fat cell differentiation	NA	NA	NA|(RefSeq) mesenteric estrogen dependent adipogenesis	NA	NA	mesenteric estrogen dependent adipogenesis	down
Pcdhgb8	-2.5426	1.75e-07	8.27e-07	4	10	9	60	32	50	ENSMUSG00000103081	93705	18	37761801	37841870	+	GO:0007155|cell adhesion;GO:0007156|homophilic cell adhesion via plasma membrane adhesion molecules	NA	NA	K16496|protocadherin gamma subfamily B	NA	NA	protocadherin gamma subfamily B, 8	down
Gm15640	-2.17165	0.000193567	0.000645936	8	6	4	20	27	37	ENSMUSG00000085781	NA	16	45936323	45939279	+	NA	NA	NA	NA	NA	NA	predicted gene 15640	down
Pcdhga6	-3.77654	0.000432726	0.00137145	1	0	2	12	16	15	ENSMUSG00000103793	93714	18	37707039	37841873	+	GO:0007155|cell adhesion;GO:0007156|homophilic cell adhesion via plasma membrane adhesion molecules	NA	NA	K16495|protocadherin gamma subfamily A	NA	NA	protocadherin gamma subfamily A, 6	down
Gm49027	3.7933	0.000637556	0.00196637	21	10	8	2	1	0	ENSMUSG00000114278	NA	5	123512082	123525488	-	NA	NA	GO:0016020|membrane;GO:0016021|integral component of membrane	NA	NA	NA	predicted gene, 49027	up
Nrcam	5.93408	3.36e-05	0.000124003	9	9	14	0	0	0	ENSMUSG00000020598	319504	12	44328885	44601964	+	GO:0001525|angiogenesis;GO:0007155|cell adhesion;GO:0007411|axon guidance;GO:0007417|central nervous system development;GO:0008104|protein localization;GO:0010975|regulation of neuron projection development;GO:0019227|neuronal action potential propagation	NA	NA	K06756|neuronal cell adhesion molecule	mmu04514	Cell adhesion molecules (CAMs)	neuronal cell adhesion molecule	up
Vps37d	-2.00913	2.02e-06	8.62e-06	16	7	14	59	63	36	ENSMUSG00000043614	194309	5	135072900	135078266	-	GO:0015031|protein transport;GO:0032509|endosome transport via multivesicular body sorting pathway	NA	NA	K12185|ESCRT-I complex subunit VPS37	mmu04144	Endocytosis	vacuolar protein sorting 37D	down
Iglon5	-3.84622	2.87e-77	1.75e-75	26	23	33	460	387	398	ENSMUSG00000013367	210094	7	43472904	43490075	-	NA	NA	GO:0005576|extracellular region	K06773|opioid binding protein/cell adhesion molecule-like	NA	NA	IgLON family member 5	down
A930030B08Rik	5.2143	0.000197901	0.000659146	18	6	14	1	0	0	ENSMUSG00000108985	NA	7	99900192	99904156	-	NA	NA	NA	NA	NA	NA	RIKEN cDNA A930030B08 gene	up
Mef2b	2.82825	0.00125762	0.00369433	13	13	14	3	2	1	ENSMUSG00000079033	105980076	8	70139711	70167488	+	GO:0045944|positive regulation of transcription by RNA polymerase II	NA	NA	K09261|MADS-box transcription enhancer factor 2B	mmu04022|mmu04371	cGMP-PKG signaling pathway|Apelin signaling pathway	myocyte enhancer factor 2B	up
Npc1l1	4.3635	0.000400757	0.0012781	14	13	12	1	0	1	ENSMUSG00000020447	237636	11	6211013	6230143	-	GO:0006695|cholesterol biosynthetic process;GO:0030299|intestinal cholesterol absorption;GO:0030301|cholesterol transport;GO:0042157|lipoprotein metabolic process;GO:0042493|response to drug;GO:0071501|cellular response to sterol depletion	NA	NA	K14461|Niemann-Pick C1-like protein 1	mmu04975	Fat digestion and absorption	NPC1 like intracellular cholesterol transporter 1	up
Tcp11x2	2.3157	4.47e-06	1.83e-05	56	36	30	14	3	9	ENSMUSG00000058252	71841	X	135654698	135693790	-	GO:0008150|biological_process	NA	NA	NA|(RefSeq) t-complex 11 family, X-linked 2	NA	NA	t-complex 11 family, X-linked 2	up
Prl2c2	-5.42035	3.85e-14	3e-13	1	1	3	78	65	82	ENSMUSG00000079092	18811	13	12996125	13005383	-	GO:0002040|sprouting angiogenesis;GO:0002052|positive regulation of neuroblast proliferation;GO:0010469|regulation of signaling receptor activity;GO:0031346|positive regulation of cell projection organization;GO:0032534|regulation of microvillus assembly;	NA	NA	NA|(RefSeq) prolactin family 2, subfamily c, member 2	NA	NA	prolactin family 2, subfamily c, member 2	down
Shmt2	-2.098	0	0	1523	1682	1736	8263	7439	6674	ENSMUSG00000025403	108037	10	127517123	127522444	-	GO:0002082|regulation of oxidative phosphorylation;GO:0006544|glycine metabolic process;GO:0006545|glycine biosynthetic process;GO:0006563|L-serine metabolic process;GO:0006564|L-serine biosynthetic process;GO:0006730|one-carbon metabolic process;GO:00082	NA	NA	K00600|glycine hydroxymethyltransferase [EC:2.1.2.1]	mmu00260|mmu00630|mmu00670|mmu01100|mmu01200|mmu01230|mmu01523	Glycine, serine and threonine metabolism|Glyoxylate and dicarboxylate metabolism|One carbon pool by folate|Metabolic pathways|Carbon metabolism|Biosynthesis of amino acids|Antifolate resistance	serine hydroxymethyltransferase 2 (mitochondrial)	down
Dkk3	-2.57434	0.00363102	0.00978651	1	1	5	11	24	9	ENSMUSG00000030772	50781	7	112116017	112159057	-	GO:0007275|multicellular organism development;GO:0016055|Wnt signaling pathway;GO:0030178|negative regulation of Wnt signaling pathway;GO:0032348|negative regulation of aldosterone biosynthetic process;GO:0045892|negative regulation of transcription, DNA-	NA	NA	NA|(RefSeq) dickkopf WNT signaling pathway inhibitor 3	NA	NA	dickkopf WNT signaling pathway inhibitor 3	down
B130034C11Rik	-2.01352	0.00217141	0.00610754	7	1	9	40	20	14	ENSMUSG00000093606	414095	16	87495999	87504033	+	NA	NA	NA	NA|(RefSeq) RIKEN cDNA B130034C11 gene	NA	NA	RIKEN cDNA B130034C11 gene	down
H2-M10.1	-3.15029	6.05e-05	0.000215718	3	5	0	41	10	25	ENSMUSG00000024448	14985	17	36322858	36326155	-	NA	NA	GO:0016020|membrane;GO:0016021|integral component of membrane	K06751|major histocompatibility complex, class I	mmu04144|mmu04145|mmu04218|mmu04514|mmu04612|mmu04940|mmu05163|mmu05165|mmu05166|mmu05167|mmu05168|mmu05169|mmu05170|mmu05203|mmu05320|mmu05330|mmu05332|mmu05416	Endocytosis|Phagosome|Cellular senescence|Cell adhesion molecules (CAMs)|Antigen processing and presentation|Type I diabetes mellitus|Human cytomegalovirus infection|Human papillomavirus infection|Human T-cell leukemia virus 1 infection|Kaposi sarcoma-ass	histocompatibility 2, M region locus 10.1	down
Bpifc	-2.73622	6.61e-07	2.95e-06	6	6	4	55	30	29	ENSMUSG00000050108	270757	10	85959340	86011895	-	NA	NA	GO:0005615|extracellular space	NA|(RefSeq) BPI fold containing family C	NA	NA	BPI fold containing family C	down
Apol6	-2.19691	1.53e-18	1.54e-17	38	38	26	203	132	160	ENSMUSG00000033576	71939	15	77044729	77057106	+	GO:0006869|lipid transport;GO:0008150|biological_process;GO:0042157|lipoprotein metabolic process	NA	NA	K14480|apolipoprotein L	NA	NA	apolipoprotein L 6	down
C130026L21Rik	-5.27212	0.000116962	0.000401984	0	0	1	19	10	15	ENSMUSG00000052848	330164	5	111581422	111604932	+	NA	NA	NA	NA|(RefSeq) RIKEN cDNA C130026L21 gene	NA	NA	RIKEN cDNA C130026L21 gene	down
Gsta3	7.3652	2.15e-09	1.19e-08	46	59	63	0	0	1	ENSMUSG00000025934	14859	1	21240589	21265661	+	GO:0001657|ureteric bud development;GO:0006749|glutathione metabolic process;GO:0046223|aflatoxin catabolic process	NA	NA	K00799|glutathione S-transferase [EC:2.5.1.18]	mmu00480|mmu00980|mmu00982|mmu00983|mmu01524|mmu05200|mmu05204|mmu05225|mmu05418	Glutathione metabolism|Metabolism of xenobiotics by cytochrome P450|Drug metabolism - cytochrome P450|Drug metabolism - other enzymes|Platinum drug resistance|Pathways in cancer|Chemical carcinogenesis|Hepatocellular carcinoma|Fluid shear stress and ather	glutathione S-transferase, alpha 3	up
Susd2	3.94461	0.00293216	0.00803763	15	10	4	1	1	0	ENSMUSG00000006342	71733	10	75636706	75644008	-	GO:0006898|receptor-mediated endocytosis;GO:0006955|immune response;GO:0051782|negative regulation of cell division;GO:1902807|negative regulation of cell cycle G1/S phase transition	NA	NA	NA|(RefSeq) sushi domain containing 2	NA	NA	sushi domain containing 2	up
Mgam	6.54547	1.36e-06	5.88e-06	19	10	20	0	0	0	ENSMUSG00000068587	232714	6	40628831	40769123	+	GO:0000023|maltose metabolic process;GO:0005975|carbohydrate metabolic process;GO:0008152|metabolic process	NA	NA	K12047|maltase-glucoamylase [EC:3.2.1.20 3.2.1.3]	mmu00052|mmu00500|mmu01100|mmu04973	Galactose metabolism|Starch and sucrose metabolism|Metabolic pathways|Carbohydrate digestion and absorption	maltase-glucoamylase	up
1700001C19Rik	-2.87217	2.32e-08	1.19e-07	4	8	6	68	35	38	ENSMUSG00000047150	75462	17	47412734	47437376	-	GO:0008150|biological_process	NA	NA	NA|(RefSeq) RIKEN cDNA 1700001C19 gene	NA	NA	RIKEN cDNA 1700001C19 gene	down
Dthd1	5.02318	0.00193923	0.00550585	4	6	7	0	0	0	ENSMUSG00000090326	100322896	5	62813823	62888308	+	GO:0007165|signal transduction	NA	NA	NA|(RefSeq) death domain containing 1	NA	NA	death domain containing 1	up
Dmp1	5.02351	0.00193738	0.00550141	4	7	6	0	0	0	ENSMUSG00000029307	13406	5	104202613	104214102	+	GO:0001503|ossification;GO:0010811|positive regulation of cell-substrate adhesion;GO:0030198|extracellular matrix organization;GO:0031214|biomineral tissue development;GO:0070173|regulation of enamel mineralization	NA	NA	NA|(RefSeq) dentin matrix protein 1	NA	NA	dentin matrix protein 1	up
Dnmt3l	-2.97441	5.73e-05	0.000204919	5	0	4	15	27	31	ENSMUSG00000000730	54427	10	78041947	78063622	+	GO:0001701|in utero embryonic development;GO:0001890|placenta development;GO:0006306|DNA methylation;GO:0007141|male meiosis I;GO:0007283|spermatogenesis;GO:0010529|negative regulation of transposition;GO:0030154|cell differentiation;GO:0032259|methylatio	NA	NA	K17400|DNA (cytosine-5)-methyltransferase 3-like	NA	NA	DNA (cytosine-5-)-methyltransferase 3-like	down
Gpr174	7.45698	4.19e-09	2.27e-08	29	30	33	0	0	0	ENSMUSG00000073008	213439	X	107255878	107296769	+	GO:0007165|signal transduction;GO:0007186|G protein-coupled receptor signaling pathway;GO:0043029|T cell homeostasis	NA	NA	K08391|G protein-coupled receptor 174	NA	NA	G protein-coupled receptor 174	up
Gpr182	2.1273	4.69e-07	2.12e-06	47	44	53	17	7	11	ENSMUSG00000058396	11536	10	127747276	127751732	-	GO:0007165|signal transduction;GO:0007186|G protein-coupled receptor signaling pathway	NA	NA	K04242|adrenomedullin receptor	NA	NA	G protein-coupled receptor 182	up
Mndal	4.97144	0.000440137	0.00139295	10	9	13	0	1	0	ENSMUSG00000090272	100040462	1	173849126	173942491	-	GO:0000122|negative regulation of transcription by RNA polymerase II;GO:0002218|activation of innate immune response;GO:0030308|negative regulation of cell growth;GO:0035458|cellular response to interferon-beta;GO:0040008|regulation of growth	NA	NA	NA|(RefSeq) myeloid nuclear differentiation antigen like	NA	NA	myeloid nuclear differentiation antigen like	up
Dnm3	-2.26842	2.01e-05	7.62e-05	11	8	2	41	36	30	ENSMUSG00000040265	103967	1	161982453	162478034	-	GO:0006897|endocytosis;GO:0007416|synapse assembly;GO:0016185|synaptic vesicle budding from presynaptic endocytic zone membrane;GO:0046847|filopodium assembly;GO:0051491|positive regulation of filopodium assembly;GO:0061001|regulation of dendritic spine m	NA	NA	K01528|dynamin GTPase [EC:3.6.5.5]	mmu04072|mmu04144|mmu04721|mmu04961|mmu05100	Phospholipase D signaling pathway|Endocytosis|Synaptic vesicle cycle|Endocrine and other factor-regulated calcium reabsorption|Bacterial invasion of epithelial cells	dynamin 3	down
Sh2d4a	-2.20809	0.000189881	0.000634296	7	5	4	31	20	27	ENSMUSG00000053886	72281	8	68276567	68347699	+	GO:0010923|negative regulation of phosphatase activity	NA	NA	K17577|SH2 domain-containing protein 4A	NA	NA	SH2 domain containing 4A	down
Cpeb1	5.91158	4.24e-14	3.31e-13	80	78	69	3	1	0	ENSMUSG00000025586	12877	7	81347026	81455465	-	GO:0006397|mRNA processing;GO:0006412|translation;GO:0006417|regulation of translation;GO:0007130|synaptonemal complex assembly;GO:0008285|negative regulation of cell population proliferation;GO:0010976|positive regulation of neuron projection development	NA	NA	K02602|cytoplasmic polyadenylation element-binding protein	mmu04114|mmu04914	Oocyte meiosis|Progesterone-mediated oocyte maturation	cytoplasmic polyadenylation element binding protein 1	up
AC154265.2	4.84165	0.00369527	0.00994024	4	5	6	0	0	0	ENSMUSG00000116439	NA	16	14479898	14483746	-	NA	NA	NA	NA	NA	NA	predicted gene, 49528	up
Serpinb6b	-2.83368	1.36e-30	2.31e-29	26	24	31	187	231	189	ENSMUSG00000042842	20708	13	32965209	32979067	+	GO:0008406|gonad development;GO:0010951|negative regulation of endopeptidase activity	NA	NA	K13963|serpin B	mmu05146	Amoebiasis	serine (or cysteine) peptidase inhibitor, clade B, member 6b	down
Serpinb1a	-4.47381	1.17e-74	6.68e-73	16	13	22	401	409	383	ENSMUSG00000044734	66222	13	32842092	32851185	-	GO:0010466|negative regulation of peptidase activity;GO:0010951|negative regulation of endopeptidase activity;GO:0042176|regulation of protein catabolic process	NA	NA	K13963|serpin B	mmu05146	Amoebiasis	serine (or cysteine) peptidase inhibitor, clade B, member 1a	down
Gm27048	-2.26751	0.00329433	0.0089503	2	4	3	19	13	14	ENSMUSG00000098001	NA	8	80933534	80938667	-	NA	NA	NA	NA	NA	NA	predicted gene, 27048	down
1110002E22Rik	5.41977	1.99e-06	8.48e-06	37	26	19	0	0	2	ENSMUSG00000090066	102634333	3	138065052	138081506	+	GO:0008150|biological_process	NA	NA	NA|(RefSeq) RIKEN cDNA 1110002E22 gene	NA	NA	RIKEN cDNA 1110002E22 gene	up
Hspb6	-2.37097	2.99e-57	1.14e-55	93	73	93	538	473	407	ENSMUSG00000036854	243912	7	30552178	30555443	+	GO:0006937|regulation of muscle contraction;GO:0010667|negative regulation of cardiac muscle cell apoptotic process;GO:0045766|positive regulation of angiogenesis;GO:0061077|chaperone-mediated protein folding	NA	NA	K09545|heat shock protein beta-6	NA	NA	heat shock protein, alpha-crystallin-related, B6	down
Vcan	-2.19313	0	0	2327	2194	2384	12426	10792	10158	ENSMUSG00000021614	13003	13	89655312	89742509	-	GO:0007155|cell adhesion	NA	NA	K06793|versican core protein	mmu04514	Cell adhesion molecules (CAMs)	versican	down
9930111J21Rik2	-2.69994	1.44e-11	9.37e-11	10	7	15	83	56	80	ENSMUSG00000069892	245240	11	49015874	49051242	-	GO:0008150|biological_process	NA	NA	NA|(RefSeq) RIKEN cDNA 9930111J21 gene 2	NA	NA	RIKEN cDNA 9930111J21 gene 2	down
Mapk8ip2	4.94034	0.0033745	0.00915009	2	10	4	0	0	0	ENSMUSG00000022619	60597	15	89453913	89464468	+	GO:0000165|MAPK cascade;GO:0001662|behavioral fear response;GO:0007254|JNK cascade;GO:0007617|mating behavior;GO:0010469|regulation of signaling receptor activity;GO:0016310|phosphorylation;GO:0032147|activation of protein kinase activity;GO:0032874|posit	NA	NA	K04435|mitogen-activated protein kinase 8 interacting protein 2	mmu04010	MAPK signaling pathway	mitogen-activated protein kinase 8 interacting protein 2	up
Gm17396	-2.57033	0.000419841	0.00133412	3	6	1	28	13	22	ENSMUSG00000079669	NA	9	117252536	117254696	+	NA	NA	NA	NA	NA	NA	predicted gene, 17396	down
Lrrc17	-6.87279	1.93e-07	9.06e-07	0	0	0	26	31	12	ENSMUSG00000039883	74511	5	21543559	21575904	+	GO:0001503|ossification;GO:0045671|negative regulation of osteoclast differentiation;GO:0048539|bone marrow development	NA	NA	NA|(RefSeq) leucine rich repeat containing 17	NA	NA	leucine rich repeat containing 17	down
Ackr3	-2.1149	8.4e-54	3.01e-52	102	119	110	536	487	489	ENSMUSG00000044337	12778	1	90203980	90216751	+	GO:0001525|angiogenesis;GO:0001570|vasculogenesis;GO:0006935|chemotaxis;GO:0007155|cell adhesion;GO:0007165|signal transduction;GO:0007186|G protein-coupled receptor signaling pathway;GO:0007275|multicellular organism development;GO:0031623|receptor inter	NA	NA	K04304|C-X-C chemokine receptor type 7 (atypical chemokine receptor 3)	mmu04060	Cytokine-cytokine receptor interaction	atypical chemokine receptor 3	down
Gm42476	-4.09051	0.00140173	0.00407695	0	1	1	21	10	6	ENSMUSG00000106293	NA	3	81032954	81033774	+	NA	NA	NA	NA	NA	NA	predicted gene 42476	down
Card14	3.96003	1.01e-10	6.22e-10	49	42	43	1	3	5	ENSMUSG00000013483	170720	11	119307768	119345375	+	GO:0001934|positive regulation of protein phosphorylation;GO:0006915|apoptotic process;GO:0033209|tumor necrosis factor-mediated signaling pathway;GO:0042981|regulation of apoptotic process;GO:0043066|negative regulation of apoptotic process;GO:0051092|po	NA	NA	K20913|caspase recruitment domain-containing protein 14	mmu04064	NF-kappa B signaling pathway	caspase recruitment domain family, member 14	up
Kank1	2.11591	3.19e-05	0.000117777	46	32	24	12	7	6	ENSMUSG00000032702	107351	19	25236975	25434496	+	GO:0008283|cell population proliferation;GO:0010977|negative regulation of neuron projection development;GO:0030036|actin cytoskeleton organization;GO:0030177|positive regulation of Wnt signaling pathway;GO:0030336|negative regulation of cell migration;GO	NA	NA	K22808|KN motif and ankyrin repeat domain-containing protein	NA	NA	KN motif and ankyrin repeat domains 1	up
Mep1a	2.40596	1.6e-06	6.9e-06	47	45	24	7	8	8	ENSMUSG00000023914	17287	17	43474324	43502812	-	GO:0006508|proteolysis	NA	NA	K01395|meprin A [EC:3.4.24.18]	mmu04974	Protein digestion and absorption	meprin 1 alpha	up
Cacna1g	-2.60036	1.03e-16	9.29e-16	23	16	13	127	118	89	ENSMUSG00000020866	12291	11	94408391	94474198	-	GO:0001508|action potential;GO:0002027|regulation of heart rate;GO:0006811|ion transport;GO:0006816|calcium ion transport;GO:0007204|positive regulation of cytosolic calcium ion concentration;GO:0007268|chemical synaptic transmission;GO:0010045|response t	NA	NA	K04854|voltage-dependent calcium channel T type alpha-1G	mmu04010|mmu04020|mmu04713|mmu04925|mmu04927|mmu04930|mmu04934	MAPK signaling pathway|Calcium signaling pathway|Circadian entrainment|Aldosterone synthesis and secretion|Cortisol synthesis and secretion|Type II diabetes mellitus|Cushing syndrome	calcium channel, voltage-dependent, T type, alpha 1G subunit	down
Cacna1a	-3.13684	9.95e-201	2.91e-198	143	152	139	1388	1377	1259	ENSMUSG00000034656	12286	8	84388440	84640246	+	GO:0001505|regulation of neurotransmitter levels;GO:0006811|ion transport;GO:0006816|calcium ion transport;GO:0007204|positive regulation of cytosolic calcium ion concentration;GO:0007214|gamma-aminobutyric acid signaling pathway;GO:0007268|chemical synap	NA	NA	K04344|voltage-dependent calcium channel P/Q type alpha-1A	mmu04010|mmu04020|mmu04721|mmu04723|mmu04724|mmu04725|mmu04726|mmu04727|mmu04728|mmu04730|mmu04742|mmu04930|mmu05032|mmu05033	MAPK signaling pathway|Calcium signaling pathway|Synaptic vesicle cycle|Retrograde endocannabinoid signaling|Glutamatergic synapse|Cholinergic synapse|Serotonergic synapse|GABAergic synapse|Dopaminergic synapse|Long-term depression|Taste transduction|Type	calcium channel, voltage-dependent, P/Q type, alpha 1A subunit	down
Kcnip2	3.87845	0.000433825	0.00137448	19	15	8	0	3	0	ENSMUSG00000025221	80906	19	45791839	45816061	-	GO:0006811|ion transport;GO:0006813|potassium ion transport;GO:0034765|regulation of ion transmembrane transport;GO:0045163|clustering of voltage-gated potassium channels;GO:0071805|potassium ion transmembrane transport;GO:0086009|membrane repolarization;	NA	NA	NA|(RefSeq) Kv channel-interacting protein 2	NA	NA	Kv channel-interacting protein 2	up
Col9a1	-2.03839	0.00256159	0.00709766	4	9	2	18	15	31	ENSMUSG00000026147	12839	1	24177610	24252684	+	NA	NA	GO:0005581|collagen trimer;GO:0005594|collagen type IX trimer	K08131|collagen, type IX, alpha	mmu04151|mmu04510|mmu04512|mmu04974|mmu05165	PI3K-Akt signaling pathway|Focal adhesion|ECM-receptor interaction|Protein digestion and absorption|Human papillomavirus infection	collagen, type IX, alpha 1	down
Gramd1c	2.16402	0.00195466	0.00554497	20	24	11	4	7	2	ENSMUSG00000036292	207798	16	43980350	44063345	-	GO:0008150|biological_process;GO:0030301|cholesterol transport;GO:0071397|cellular response to cholesterol;GO:0120011|intermembrane sterol transfer	NA	NA	NA|(RefSeq) GRAM domain containing 1C	NA	NA	GRAM domain containing 1C	up
Tmem229b	5.9374	2.97e-14	2.34e-13	72	71	89	2	0	2	ENSMUSG00000046157	268567	12	78961795	79007627	-	GO:0009617|response to bacterium	NA	NA	NA|(RefSeq) transmembrane protein 229B	NA	NA	transmembrane protein 229B	up
Gm9905	-2.42964	0.00202147	0.00572	4	4	1	28	10	14	ENSMUSG00000053358	NA	7	121033252	121035096	-	NA	NA	NA	NA	NA	NA	predicted gene 9905	down
Ifi30	2.01261	1.13e-146	1.98e-144	2219	2443	2089	689	571	512	ENSMUSG00000031838	NA	8	70762774	70766663	-	NA	NA	NA	NA	NA	NA	interferon gamma inducible protein 30	up
Mmp9	-3.00695	5.84e-07	2.63e-06	3	2	7	38	33	31	ENSMUSG00000017737	17395	2	164940780	164955850	+	GO:0001501|skeletal system development;GO:0001503|ossification;GO:0001934|positive regulation of protein phosphorylation;GO:0002687|positive regulation of leukocyte migration;GO:0006508|proteolysis;GO:0006979|response to oxidative stress;GO:0007507|heart	NA	NA	K01403|matrix metalloproteinase-9 (gelatinase B) [EC:3.4.24.35]	mmu01522|mmu04657|mmu04668|mmu04670|mmu04915|mmu04926|mmu05161|mmu05200|mmu05202|mmu05205|mmu05206|mmu05215|mmu05219|mmu05418	Endocrine resistance|IL-17 signaling pathway|TNF signaling pathway|Leukocyte transendothelial migration|Estrogen signaling pathway|Relaxin signaling pathway|Hepatitis B|Pathways in cancer|Transcriptional misregulation in cancer|Proteoglycans in cancer|Mic	matrix metallopeptidase 9	down
B3gat2	2.04367	8.33e-06	3.29e-05	39	33	41	12	8	9	ENSMUSG00000026156	280645	1	23761753	23849158	+	GO:0006486|protein glycosylation;GO:0016051|carbohydrate biosynthetic process	NA	NA	K10157|galactosylgalactosylxylosylprotein 3-beta-glucuronosyltransferase 2 [EC:2.4.1.135]	mmu00515|mmu01100	Mannose type O-glycan biosynthesis|Metabolic pathways	beta-1,3-glucuronyltransferase 2 (glucuronosyltransferase S)	up
Gm12902	2.25406	0.00174129	0.00498271	20	13	17	4	2	5	ENSMUSG00000082515	NA	4	123926234	123926555	+	NA	NA	NA	NA	NA	NA	predicted gene 12902	up
Col6a1	-2.68596	0	0	1118	1097	1110	8734	6883	7018	ENSMUSG00000001119	12833	10	76708792	76726168	-	GO:0007155|cell adhesion;GO:0035987|endodermal cell differentiation;GO:0070208|protein heterotrimerization;GO:0071230|cellular response to amino acid stimulus	NA	NA	K06238|collagen, type VI, alpha	mmu04151|mmu04510|mmu04512|mmu04974|mmu05165	PI3K-Akt signaling pathway|Focal adhesion|ECM-receptor interaction|Protein digestion and absorption|Human papillomavirus infection	collagen, type VI, alpha 1	down
Col6a2	-3.26769	0	0	446	526	482	5458	4733	4605	ENSMUSG00000020241	12834	10	76595762	76623630	-	GO:0007155|cell adhesion;GO:0009749|response to glucose;GO:0070208|protein heterotrimerization	NA	NA	K06238|collagen, type VI, alpha	mmu04151|mmu04510|mmu04512|mmu04974|mmu05165	PI3K-Akt signaling pathway|Focal adhesion|ECM-receptor interaction|Protein digestion and absorption|Human papillomavirus infection	collagen, type VI, alpha 2	down
Mrpl54	-2.25844	5.02e-66	2.36e-64	121	150	113	656	652	627	ENSMUSG00000034932	66047	10	81264713	81266934	-	GO:0008150|biological_process	NA	NA	K17435|large subunit ribosomal protein L54	NA	NA	mitochondrial ribosomal protein L54	down
Qrich2	3.02985	0.00218838	0.00615348	11	11	18	0	0	5	ENSMUSG00000070331	217341	11	116441325	116466241	-	GO:0008150|biological_process	NA	NA	NA|(RefSeq) glutamine rich 2	NA	NA	glutamine rich 2	up
Adamtsl4	-2.25321	6.02e-68	2.91e-66	163	137	108	771	660	624	ENSMUSG00000015850	229595	3	95676201	95687917	-	GO:0002064|epithelial cell development;GO:0006508|proteolysis;GO:0006915|apoptotic process;GO:0030198|extracellular matrix organization;GO:0043065|positive regulation of apoptotic process	NA	NA	NA|(RefSeq) ADAMTS-like 4	NA	NA	ADAMTS-like 4	down
Mrgprf	-2.76376	4.18e-46	1.23e-44	44	37	45	340	280	284	ENSMUSG00000031070	211577	7	145300828	145309557	+	GO:0007165|signal transduction;GO:0007186|G protein-coupled receptor signaling pathway	NA	NA	K08394|Mas-related G protein-coupled receptor member F	NA	NA	MAS-related GPR, member F	down
Meox1	-4.54436	0.00214558	0.00604019	0	0	1	5	11	10	ENSMUSG00000001493	17285	11	101877510	101894374	-	GO:0001757|somite specification;GO:0006355|regulation of transcription, DNA-templated;GO:0007275|multicellular organism development;GO:0045944|positive regulation of transcription by RNA polymerase II;GO:0060218|hematopoietic stem cell differentiation;GO:	NA	NA	K09322|homeobox protein MOX	NA	NA	mesenchyme homeobox 1	down
Pvrig	-2.36689	7.41e-05	0.000262073	3	8	4	30	29	23	ENSMUSG00000109713	102640920	5	138341961	138343557	+	GO:0050860|negative regulation of T cell receptor signaling pathway	NA	NA	NA|(RefSeq) poliovirus receptor related immunoglobulin domain containing	NA	NA	poliovirus receptor related immunoglobulin domain containing	down
Ctxn1	-3.38324	3.49e-10	2.06e-09	4	4	5	52	43	48	ENSMUSG00000048644	330695	8	4257660	4259274	-	GO:0008150|biological_process	NA	NA	NA|(RefSeq) cortexin 1	NA	NA	cortexin 1	down
Mpp4	4.66029	0.000116337	0.000400049	21	10	17	1	0	1	ENSMUSG00000079550	227157	1	59120935	59163389	-	GO:0035418|protein localization to synapse	NA	NA	K21109|MAGUK p55 subfamily member 4	mmu04530	Tight junction	membrane protein, palmitoylated 4 (MAGUK p55 subfamily member 4)	up
2310001H17Rik	-2.16657	1.59e-11	1.04e-10	22	23	16	115	71	103	ENSMUSG00000097354	76432	6	129208412	129238725	-	NA	NA	NA	NA|(RefSeq) RIKEN cDNA 2310001H17 gene	NA	NA	RIKEN cDNA 2310001H17 gene	down
Ccdc170	3.47586	0.00046576	0.00146747	17	7	18	2	1	1	ENSMUSG00000019767	100504234	10	4482502	4562231	+	GO:0008150|biological_process	NA	NA	NA|(RefSeq) coiled-coil domain containing 170	NA	NA	coiled-coil domain containing 170	up
Ccdc169	-3.88694	0.00283405	0.00779208	2	0	0	10	11	10	ENSMUSG00000048655	320604	3	55137339	55172935	+	GO:0008150|biological_process	NA	NA	NA|(RefSeq) coiled-coil domain containing 169	NA	NA	coiled-coil domain containing 169	down
Ccdc141	2.29664	1.53e-06	6.58e-06	51	40	34	14	4	9	ENSMUSG00000044033	545428	2	77009902	77170636	-	GO:0021799|cerebral cortex radially oriented cell migration;GO:0051642|centrosome localization	NA	NA	NA|(RefSeq) coiled-coil domain containing 141	NA	NA	coiled-coil domain containing 141	up
Celsr2	3.52756	1.2e-05	4.64e-05	20	30	15	3	2	1	ENSMUSG00000068740	53883	3	108390851	108415552	-	GO:0007155|cell adhesion;GO:0007156|homophilic cell adhesion via plasma membrane adhesion molecules;GO:0007165|signal transduction;GO:0007166|cell surface receptor signaling pathway;GO:0007186|G protein-coupled receptor signaling pathway	NA	NA	K04601|cadherin EGF LAG seven-pass G-type receptor 2	NA	NA	cadherin, EGF LAG seven-pass G-type receptor 2	up
Gm32443	4.61251	0.00180612	0.00515827	10	5	10	0	1	0	ENSMUSG00000112876	NA	12	31082581	31090561	-	NA	NA	NA	NA	NA	NA	predicted gene, 32443	up
Foxl1	-2.80258	5.64e-08	2.78e-07	3	4	12	41	49	49	ENSMUSG00000097084	14241	8	121127940	121130644	+	GO:0006355|regulation of transcription, DNA-templated;GO:0007495|visceral mesoderm-endoderm interaction involved in midgut development;GO:0007507|heart development;GO:0030111|regulation of Wnt signaling pathway;GO:0030166|proteoglycan biosynthetic process	NA	NA	K09405|forkhead box protein L	NA	NA	forkhead box L1	down
Rnaset2a	2.57909	0.000301729	0.00098043	14	21	22	2	4	4	ENSMUSG00000095687	100037283	17	8115445	8148097	-	GO:0090305|nucleic acid phosphodiester bond hydrolysis;GO:0090501|RNA phosphodiester bond hydrolysis;GO:0090502|RNA phosphodiester bond hydrolysis, endonucleolytic	NA	NA	K01166|ribonuclease T2 [EC:3.1.27.1]	NA	NA	ribonuclease T2A	up
Atp13a4	2.03676	2.77e-06	1.16e-05	35	55	46	10	16	9	ENSMUSG00000038094	224079	16	29395853	29544864	-	GO:0006812|cation transport	NA	NA	K14951|cation-transporting P-type ATPase 13A3/4/5 [EC:3.6.3.-]	NA	NA	ATPase type 13A4	up
Prelp	-5.46221	1.33e-17	1.27e-16	6	0	9	288	233	182	ENSMUSG00000041577	116847	1	133910304	133921414	-	GO:0007569|cell aging	NA	NA	K08125|proline arginine-rich end leucine-rich repeat protein	NA	NA	proline arginine-rich end leucine-rich repeat	down
2024-09-12	-2.02706	0.000583586	0.0018112	7	9	5	38	12	40	ENSMUSG00000022542	71089	16	4986858	4997852	-	GO:0030317|flagellated sperm motility	NA	NA	K16938|septin 3/9/12	mmu05100	Bacterial invasion of epithelial cells	septin 12	down
2024-09-14	3.38556	0.00325233	0.00884491	13	11	6	1	0	2	ENSMUSG00000034219	74222	5	129683391	129708512	-	GO:0007049|cell cycle;GO:0051301|cell division	NA	NA	K16941|septin 14	NA	NA	septin 14	up
Mrc1	5.24878	0.000950566	0.00284801	11	6	3	0	0	0	ENSMUSG00000026712	17533	2	14229392	14332057	+	GO:0006897|endocytosis;GO:0006898|receptor-mediated endocytosis;GO:0071222|cellular response to lipopolysaccharide;GO:0071346|cellular response to interferon-gamma;GO:0071353|cellular response to interleukin-4	NA	NA	K06560|mannose receptor, C type	mmu04145|mmu05152	Phagosome|Tuberculosis	mannose receptor, C type 1	up
Gm22711	-2.45817	1.18e-05	4.6e-05	5	7	4	34	32	27	ENSMUSG00000105884	NA	11	106501243	106501377	+	NA	NA	NA	NA	NA	NA	predicted gene, 22711	down
Nabp1	2.61531	3.05e-169	6.68e-167	1285	1215	1296	218	224	211	ENSMUSG00000026107	109019	1	51465862	51478425	-	GO:0000724|double-strand break repair via homologous recombination;GO:0006281|DNA repair;GO:0006974|cellular response to DNA damage stimulus;GO:0007093|mitotic cell cycle checkpoint;GO:0010212|response to ionizing radiation	NA	NA	NA|(RefSeq) nucleic acid binding protein 1	NA	NA	nucleic acid binding protein 1	up
2610307P16Rik	-2.75313	0.000355577	0.00114061	3	2	4	42	11	13	ENSMUSG00000085936	NA	13	28460034	28885620	-	NA	NA	NA	NA	NA	NA	RIKEN cDNA 2610307P16 gene	down
Gm32200	5.01968	0.00189006	0.00537969	6	5	6	0	0	0	ENSMUSG00000103114	NA	1	191436340	191465048	-	NA	NA	NA	NA	NA	NA	predicted gene, 32200	up
Msr1	7.00269	9.32e-08	4.5e-07	15	30	22	0	0	0	ENSMUSG00000025044	20288	8	39581685	39642673	-	GO:0006897|endocytosis;GO:0006898|receptor-mediated endocytosis;GO:0006911|phagocytosis, engulfment;GO:0010629|negative regulation of gene expression;GO:0010744|positive regulation of macrophage derived foam cell differentiation;GO:0010886|positive regula	NA	NA	K06558|macrophage scavenger receptor 1	mmu04145	Phagosome	macrophage scavenger receptor 1	up
Igf1	-3.47225	7.59e-28	1.17e-26	22	9	10	197	160	126	ENSMUSG00000020053	16000	10	87858265	87937042	+	GO:0000187|activation of MAPK activity;GO:0001649|osteoblast differentiation;GO:0001775|cell activation;GO:0001932|regulation of protein phosphorylation;GO:0001974|blood vessel remodeling;GO:0002683|negative regulation of immune system process;GO:0006417|	NA	NA	K05459|insulin-like growth factor 1	mmu01521|mmu01522|mmu04010|mmu04014|mmu04015|mmu04066|mmu04068|mmu04114|mmu04115|mmu04150|mmu04151|mmu04152|mmu04211|mmu04213|mmu04510|mmu04550|mmu04730|mmu04750|mmu04913|mmu04914|mmu04960|mmu05200|mmu05202|mmu05205|mmu05214|mmu05215|mmu05218|mmu05224|mmu	EGFR tyrosine kinase inhibitor resistance|Endocrine resistance|MAPK signaling pathway|Ras signaling pathway|Rap1 signaling pathway|HIF-1 signaling pathway|FoxO signaling pathway|Oocyte meiosis|p53 signaling pathway|mTOR signaling pathway|PI3K-Akt signalin	insulin-like growth factor 1	down
Col3a1	-4.44422	0	0	1060	1040	970	25795	21981	22721	ENSMUSG00000026043	12825	1	45311538	45349706	+	GO:0001501|skeletal system development;GO:0001568|blood vessel development;GO:0007160|cell-matrix adhesion;GO:0007179|transforming growth factor beta receptor signaling pathway;GO:0007229|integrin-mediated signaling pathway;GO:0007507|heart development;GO	NA	NA	K19720|collagen, type III, alpha	mmu04611|mmu04926|mmu04933|mmu04974|mmu05146	Platelet activation|Relaxin signaling pathway|AGE-RAGE signaling pathway in diabetic complications|Protein digestion and absorption|Amoebiasis	collagen, type III, alpha 1	down
Kif26b	-3.93593	6.28e-88	4.72e-86	38	31	24	615	463	432	ENSMUSG00000026494	269152	1	178529125	178939200	+	GO:0007018|microtubule-based movement;GO:0007275|multicellular organism development;GO:0022409|positive regulation of cell-cell adhesion;GO:0030010|establishment of cell polarity;GO:0072092|ureteric bud invasion	NA	NA	K10404|kinesin family member 26	NA	NA	kinesin family member 26B	down
Ccdc63	2.68496	5.68e-05	0.000203389	34	19	21	4	1	7	ENSMUSG00000043036	330188	5	122108040	122140823	-	NA	NA	NA	NA|(RefSeq) coiled-coil domain containing 63	NA	NA	coiled-coil domain containing 63	up
Mex3a	-2.1574	4.42e-28	6.88e-27	50	65	50	261	243	270	ENSMUSG00000074480	72640	3	88532395	88541396	+	GO:0008150|biological_process	NA	NA	K15686|RNA-binding protein MEX3 [EC:2.3.2.27]	NA	NA	mex3 RNA binding family member A	down
Cldn9	-2.87356	1.72e-05	6.58e-05	2	3	5	23	29	25	ENSMUSG00000066720	56863	17	23682584	23684018	-	GO:0016338|calcium-independent cell-cell adhesion via plasma membrane cell-adhesion molecules;GO:0045216|cell-cell junction organization;GO:0046718|viral entry into host cell	NA	NA	K06087|claudin	mmu04514|mmu04530|mmu04670|mmu05160	Cell adhesion molecules (CAMs)|Tight junction|Leukocyte transendothelial migration|Hepatitis C	claudin 9	down
Ccdc40	2.10104	0.00112467	0.00332882	23	23	15	4	8	3	ENSMUSG00000039963	207607	11	119228572	119265236	+	GO:0001947|heart looping;GO:0003341|cilium movement;GO:0003351|epithelial cilium movement;GO:0003356|regulation of cilium beat frequency;GO:0030317|flagellated sperm motility;GO:0030324|lung development;GO:0035082|axoneme assembly;GO:0035469|determination	NA	NA	NA|(RefSeq) coiled-coil domain containing 40	NA	NA	coiled-coil domain containing 40	up
Fgf14	-3.6628	2.26e-06	9.56e-06	1	1	4	35	25	21	ENSMUSG00000025551	14169	14	123977907	124677127	-	GO:0007399|nervous system development;GO:0010469|regulation of signaling receptor activity;GO:1901843|positive regulation of high voltage-gated calcium channel activity	NA	NA	K22413|fibroblast growth factor 11/12/13/14	NA	NA	fibroblast growth factor 14	down
Fgf10	-2.82569	4.48e-12	3.04e-11	9	10	8	82	62	59	ENSMUSG00000021732	14165	13	118669791	118792115	+	GO:0000132|establishment of mitotic spindle orientation;GO:0000187|activation of MAPK activity;GO:0001525|angiogenesis;GO:0001656|metanephros development;GO:0001759|organ induction;GO:0001823|mesonephros development;GO:0001974|blood vessel remodeling;GO:0	NA	NA	K04358|fibroblast growth factor	mmu04010|mmu04014|mmu04015|mmu04151|mmu04810|mmu05200|mmu05218|mmu05224|mmu05226	MAPK signaling pathway|Ras signaling pathway|Rap1 signaling pathway|PI3K-Akt signaling pathway|Regulation of actin cytoskeleton|Pathways in cancer|Melanoma|Breast cancer|Gastric cancer	fibroblast growth factor 10	down
2810433D01Rik	-3.24447	0.000350503	0.00112621	1	4	0	18	15	17	ENSMUSG00000086283	NA	11	102619796	102624416	-	NA	NA	NA	NA	NA	NA	RIKEN cDNA 2810433D01 gene	down
Gimap8	4.93138	0.00268272	0.00739799	6	4	6	0	0	0	ENSMUSG00000064262	243374	6	48647234	48660875	+	GO:0070232|regulation of T cell apoptotic process	NA	NA	NA|(RefSeq) GTPase, IMAP family member 8	NA	NA	GTPase, IMAP family member 8	up
Gm26923	2.03704	6.61e-16	5.69e-15	181	114	137	40	38	33	ENSMUSG00000098173	NA	10	103581398	103582393	-	NA	NA	NA	NA	NA	NA	predicted gene, 26923	up
Muc2	4.68136	0.000121482	0.00041685	19	11	18	2	0	0	ENSMUSG00000025515	NA	7	141690340	141754693	+	NA	NA	GO:0005576|extracellular region;GO:0070701|mucus layer	NA	NA	NA	mucin 2	up
Csrnp1	2.12923	2.88e-33	5.53e-32	313	493	475	117	95	98	ENSMUSG00000032515	215418	9	119971163	119984658	-	GO:0006355|regulation of transcription, DNA-templated;GO:0006915|apoptotic process;GO:0009791|post-embryonic development;GO:0045944|positive regulation of transcription by RNA polymerase II;GO:0048008|platelet-derived growth factor receptor signaling path	NA	NA	K17494|cysteine/serine-rich nuclear protein	NA	NA	cysteine-serine-rich nuclear protein 1	up
Col1a2	-3.26812	0	0	13847	13816	13125	154189	133164	127867	ENSMUSG00000029661	12843	6	4504814	4541544	+	GO:0001501|skeletal system development;GO:0001568|blood vessel development;GO:0007179|transforming growth factor beta receptor signaling pathway;GO:0007266|Rho protein signal transduction;GO:0008217|regulation of blood pressure;GO:0030199|collagen fibril	NA	NA	K06236|collagen, type I, alpha	mmu04151|mmu04510|mmu04512|mmu04611|mmu04926|mmu04933|mmu04974|mmu05146|mmu05165|mmu05205	PI3K-Akt signaling pathway|Focal adhesion|ECM-receptor interaction|Platelet activation|Relaxin signaling pathway|AGE-RAGE signaling pathway in diabetic complications|Protein digestion and absorption|Amoebiasis|Human papillomavirus infection|Proteoglycans	collagen, type I, alpha 2	down
Col1a1	-3.88627	0	0	3678	3666	3243	60279	51145	53654	ENSMUSG00000001506	12842	11	94936224	94953042	+	GO:0001501|skeletal system development;GO:0001503|ossification;GO:0001568|blood vessel development;GO:0001649|osteoblast differentiation;GO:0001957|intramembranous ossification;GO:0001958|endochondral ossification;GO:0007584|response to nutrient;GO:000760	NA	NA	K06236|collagen, type I, alpha	mmu04151|mmu04510|mmu04512|mmu04611|mmu04926|mmu04933|mmu04974|mmu05146|mmu05165|mmu05205	PI3K-Akt signaling pathway|Focal adhesion|ECM-receptor interaction|Platelet activation|Relaxin signaling pathway|AGE-RAGE signaling pathway in diabetic complications|Protein digestion and absorption|Amoebiasis|Human papillomavirus infection|Proteoglycans	collagen, type I, alpha 1	down
Gm12454	2.29548	0.00012829	0.000439118	23	22	30	5	3	8	ENSMUSG00000087142	NA	4	43504428	43508747	-	NA	NA	NA	NA	NA	NA	predicted gene 12454	up
Gm9050	-2.01217	0.000198684	0.000661641	6	9	7	33	20	40	ENSMUSG00000083763	NA	X	103227705	103228152	+	NA	NA	NA	NA	NA	NA	predicted gene 9050	down
Olfr1372-ps1	2.01709	0.00367216	0.00988634	21	22	10	7	5	2	ENSMUSG00000108218	NA	11	52154722	52168159	-	NA	NA	NA	NA	NA	NA	olfactory receptor 1372, pseudogene 1	up
Fxyd1	-2.99939	5.49e-06	2.21e-05	4	2	4	24	36	24	ENSMUSG00000036570	56188	7	31051678	31057199	-	GO:0006811|ion transport;GO:0006813|potassium ion transport;GO:0006814|sodium ion transport;GO:0010734|negative regulation of protein glutathionylation;GO:0032892|positive regulation of organic acid transport;GO:0043269|regulation of ion transport;GO:0051	NA	NA	K13360|FXYD domain-containing ion transport regulator 1	mmu04024	cAMP signaling pathway	FXYD domain-containing ion transport regulator 1	down
Gm12092	5.512	0.000306093	0.000993604	13	7	4	0	0	0	ENSMUSG00000084850	NA	11	29612324	29645509	-	NA	NA	NA	NA	NA	NA	predicted gene 12092	up
Ccdc85a	-5.13238	0.00020159	0.000670047	0	0	1	15	15	10	ENSMUSG00000032878	216613	11	28385685	28584324	-	GO:0008150|biological_process	NA	NA	NA|(RefSeq) coiled-coil domain containing 85A	NA	NA	coiled-coil domain containing 85A	down
Camk2a	-2.21413	4.33e-07	1.96e-06	11	18	5	49	69	48	ENSMUSG00000024617	12322	18	60925618	60988152	+	GO:0000082|G1/S transition of mitotic cell cycle;GO:0002931|response to ischemia;GO:0006468|protein phosphorylation;GO:0006816|calcium ion transport;GO:0010666|positive regulation of cardiac muscle cell apoptotic process;GO:0016310|phosphorylation;GO:0018	NA	NA	K04515|calcium/calmodulin-dependent protein kinase (CaM kinase) II [EC:2.7.11.17]	mmu04012|mmu04020|mmu04024|mmu04066|mmu04114|mmu04217|mmu04261|mmu04310|mmu04360|mmu04713|mmu04720|mmu04722|mmu04725|mmu04728|mmu04740|mmu04750|mmu04911|mmu04912|mmu04916|mmu04921|mmu04922|mmu04925|mmu04934|mmu04971|mmu05031|mmu05152|mmu05200|mmu05205|mmu	ErbB signaling pathway|Calcium signaling pathway|cAMP signaling pathway|HIF-1 signaling pathway|Oocyte meiosis|Necroptosis|Adrenergic signaling in cardiomyocytes|Wnt signaling pathway|Axon guidance|Circadian entrainment|Long-term potentiation|Neurotrophin	calcium/calmodulin-dependent protein kinase II alpha	down
Il34	-2.12771	4.3e-18	4.21e-17	42	35	31	220	142	140	ENSMUSG00000031750	76527	8	110741829	110805924	-	GO:0001934|positive regulation of protein phosphorylation;GO:0002376|immune system process;GO:0006954|inflammatory response;GO:0008284|positive regulation of cell population proliferation;GO:0010469|regulation of signaling receptor activity;GO:0045087|inn	NA	NA	K22633|interleukin 34	mmu04060	Cytokine-cytokine receptor interaction	interleukin 34	down
Adgra2	-2.11801	2.27e-148	4.06e-146	384	386	370	2048	1664	1531	ENSMUSG00000031486	78560	8	27085583	27123436	+	GO:0001525|angiogenesis;GO:0002040|sprouting angiogenesis;GO:0007165|signal transduction;GO:0007166|cell surface receptor signaling pathway;GO:0007186|G protein-coupled receptor signaling pathway;GO:0007417|central nervous system development;GO:0010595|po	NA	NA	K08461|adhesion G protein-coupled receptor A2	NA	NA	adhesion G protein-coupled receptor A2	down
Gm12198	-4.94218	0.00229546	0.00642182	0	0	0	8	4	6	ENSMUSG00000085564	NA	11	50599298	50602448	-	NA	NA	NA	NA	NA	NA	predicted gene 12198	down
Adgrg4	5.25426	0.000739456	0.00225328	7	6	7	0	0	0	ENSMUSG00000053852	236798	X	56870163	57001558	+	GO:0007165|signal transduction;GO:0007166|cell surface receptor signaling pathway;GO:0007186|G protein-coupled receptor signaling pathway	NA	NA	K08455|adhesion G-protein coupled receptor G4	NA	NA	adhesion G protein-coupled receptor G4	up
Cyp2c55	-2.27855	1.98e-118	2.45e-116	225	227	233	1175	1217	1108	ENSMUSG00000025002	72082	19	39007019	39042693	+	GO:0019369|arachidonic acid metabolic process;GO:0043651|linoleic acid metabolic process;GO:0055114|oxidation-reduction process	NA	NA	K07413|cytochrome P450 family 2 subfamily C [EC:1.14.14.1]	mmu00140|mmu00590|mmu00591|mmu00830|mmu01100|mmu04726|mmu04750|mmu05204	Steroid hormone biosynthesis|Arachidonic acid metabolism|Linoleic acid metabolism|Retinol metabolism|Metabolic pathways|Serotonergic synapse|Inflammatory mediator regulation of TRP channels|Chemical carcinogenesis	cytochrome P450, family 2, subfamily c, polypeptide 55	down
Adgrl3	-2.43586	0.000153583	0.000519427	7	2	4	29	18	27	ENSMUSG00000037605	319387	5	81020138	81825133	+	GO:0001764|neuron migration;GO:0007165|signal transduction;GO:0007166|cell surface receptor signaling pathway;GO:0007186|G protein-coupled receptor signaling pathway;GO:0007416|synapse assembly;GO:0031987|locomotion involved in locomotory behavior;GO:0042	NA	NA	K04594|adhesion G protein-coupled receptor L3	NA	NA	adhesion G protein-coupled receptor L3	down
Gm26826	-3.6419	0.000217891	0.000721866	3	1	0	30	16	8	ENSMUSG00000097635	NA	6	122813619	122820614	-	NA	NA	NA	NA	NA	NA	predicted gene, 26826	down
Ccdc80	-2.60569	1.51e-150	2.75e-148	179	178	194	1292	1124	1124	ENSMUSG00000022665	67896	16	45093402	45128077	+	GO:0009617|response to bacterium;GO:0010811|positive regulation of cell-substrate adhesion;GO:0030198|extracellular matrix organization	NA	NA	NA|(RefSeq) coiled-coil domain containing 80	NA	NA	coiled-coil domain containing 80	down
Ccdc81	3.85845	0.00329799	0.00895899	7	10	11	0	0	2	ENSMUSG00000039391	70884	7	89866148	89903629	-	GO:0008150|biological_process	NA	NA	NA|(RefSeq) coiled-coil domain containing 81	NA	NA	coiled-coil domain containing 81	up
Gm12250	2.64824	0.000136918	0.000466745	31	16	28	10	3	0	ENSMUSG00000082292	NA	11	58187739	58189012	+	NA	NA	NA	NA	NA	NA	predicted gene 12250	up
Gm12734	2.68883	0.000259652	0.000851156	17	24	14	3	3	3	ENSMUSG00000081451	NA	11	77542133	77543080	+	NA	NA	NA	NA	NA	NA	predicted gene 12734	up
Hgsnat	2.79512	0	0	3369	3408	3491	555	500	506	ENSMUSG00000037260	52120	8	25944453	25976753	-	GO:0007041|lysosomal transport;GO:0051259|protein complex oligomerization	NA	NA	K10532|heparan-alpha-glucosaminide N-acetyltransferase [EC:2.3.1.78]	mmu00531|mmu01100|mmu04142	Glycosaminoglycan degradation|Metabolic pathways|Lysosome	heparan-alpha-glucosaminide N-acetyltransferase	up
1700001L05Rik	3.33017	2.69e-14	2.12e-13	79	62	59	8	7	6	ENSMUSG00000075511	NA	15	83353847	83367282	-	NA	NA	NA	NA	NA	NA	RIKEN cDNA 1700001L05 gene	up
1190001M18Rik	-2.15675	0.00267233	0.00737459	4	2	5	22	14	16	ENSMUSG00000111857	NA	11	82974316	82975585	-	NA	NA	NA	NA	NA	NA	RIKEN cDNA 1190001M18 gene	down
Ly6c1	-4.45722	1.68e-135	2.59e-133	27	40	30	868	699	688	ENSMUSG00000079018	17067	15	75044018	75048830	-	NA	NA	GO:0005886|plasma membrane;GO:0009897|external side of plasma membrane;GO:0009986|cell surface;GO:0016020|membrane;GO:0031225|anchored component of membrane	K06846|lymphocyte antigen 6 complex locus protein D/E/G6/H	NA	NA	lymphocyte antigen 6 complex, locus C1	down
Rgma	-2.50686	7.14e-169	1.55e-166	257	255	241	1760	1461	1313	ENSMUSG00000070509	244058	7	73375509	73419899	+	GO:0001843|neural tube closure;GO:0001934|positive regulation of protein phosphorylation;GO:0010975|regulation of neuron projection development;GO:0010976|positive regulation of neuron projection development;GO:0010977|negative regulation of neuron projec	NA	NA	K06847|RGM domain family	NA	NA	repulsive guidance molecule family member A	down
Manba	3.63109	2.44e-05	9.16e-05	23	19	17	2	0	3	ENSMUSG00000028164	110173	3	135485611	135571404	+	GO:0005975|carbohydrate metabolic process	NA	NA	K01192|beta-mannosidase [EC:3.2.1.25]	mmu00511|mmu04142	Other glycan degradation|Lysosome	mannosidase, beta A, lysosomal	up
AC087898.2	3.26504	0.000135493	0.000462394	22	22	10	3	3	0	ENSMUSG00000116604	NA	16	20566358	20568508	+	NA	NA	NA	NA	NA	NA	novel transcript	up
Selplg	5.97655	2.52e-05	9.43e-05	12	11	10	0	0	0	ENSMUSG00000048163	20345	5	113818536	113832644	-	NA	NA	GO:0016020|membrane;GO:0016021|integral component of membrane	K06544|selectin P ligand	mmu04514|mmu05150	Cell adhesion molecules (CAMs)|Staphylococcus aureus infection	selectin, platelet (p-selectin) ligand	up
Slc25a18	2.40147	3.38e-05	0.000124782	33	25	26	9	6	2	ENSMUSG00000004902	71803	6	120773578	120794336	+	GO:0055085|transmembrane transport;GO:0070778|L-aspartate transmembrane transport	NA	NA	K15107|solute carrier family 25 (mitochondrial glutamate transporter), member 18/22	NA	NA	solute carrier family 25 (mitochondrial carrier), member 18	up
Gm36535	-4.50658	0.00229365	0.0064177	0	0	1	12	6	8	ENSMUSG00000105376	NA	5	111791555	111805689	+	NA	NA	NA	NA	NA	NA	predicted gene, 36535	down
Gm567	-5.63944	0.000112373	0.00038766	0	0	0	10	10	9	ENSMUSG00000104610	NA	3	137289639	137300708	+	NA	NA	NA	NA	NA	NA	predicted gene 567	down
Epm2a	2.4777	3.54e-08	1.78e-07	53	44	49	16	6	6	ENSMUSG00000055493	13853	10	11343404	11459644	+	GO:0005975|carbohydrate metabolic process;GO:0005977|glycogen metabolic process;GO:0006470|protein dephosphorylation;GO:0006914|autophagy;GO:0007399|nervous system development;GO:0010923|negative regulation of phosphatase activity;GO:0016239|positive regu	NA	NA	K14165|atypical dual specificity phosphatase [EC:3.1.3.16 3.1.3.48]	NA	NA	epilepsy, progressive myoclonic epilepsy, type 2 gene alpha	up
Rassf2	-2.97551	7.86e-43	2.1e-41	37	28	32	292	294	221	ENSMUSG00000027339	215653	2	131989415	132030258	-	GO:0001501|skeletal system development;GO:0001503|ossification;GO:0006468|protein phosphorylation;GO:0007049|cell cycle;GO:0007165|signal transduction;GO:0031954|positive regulation of protein autophosphorylation;GO:0033137|negative regulation of peptidyl	NA	NA	K09851|Ras association domain-containing protein 2/4	mmu04392	Hippo signaling pathway - multiple species	Ras association (RalGDS/AF-6) domain family member 2	down
Rassf4	3.90059	0.00346014	0.00935732	9	15	4	1	1	0	ENSMUSG00000042129	213391	6	116633008	116673952	-	GO:0007049|cell cycle;GO:0007165|signal transduction	NA	NA	K09851|Ras association domain-containing protein 2/4	mmu04392	Hippo signaling pathway - multiple species	Ras association (RalGDS/AF-6) domain family member 4	up
Sh2d1b1	3.19513	0.00253884	0.00704145	12	6	16	3	1	0	ENSMUSG00000102418	26904	1	170277320	170286769	+	NA	NA	NA	K07989|EWS/FLI1 activated transcript 2	mmu04650	Natural killer cell mediated cytotoxicity	SH2 domain containing 1B1	up
Ecm1	-2.20892	2.44e-103	2.44e-101	185	193	195	1037	911	852	ENSMUSG00000028108	13601	3	95734147	95739569	-	GO:0001503|ossification;GO:0001525|angiogenesis;GO:0001938|positive regulation of endothelial cell proliferation;GO:0001960|negative regulation of cytokine-mediated signaling pathway;GO:0002063|chondrocyte development;GO:0002828|regulation of type 2 immun	NA	NA	NA|(RefSeq) extracellular matrix protein 1	NA	NA	extracellular matrix protein 1	down
Gm26049	2.86115	0.00324343	0.00882195	14	8	13	0	3	2	ENSMUSG00000087938	NA	4	41312091	41312198	-	NA	NA	NA	NA	NA	NA	predicted gene, 26049	up
Peli2	-2.11874	1.23e-102	1.21e-100	239	235	207	1136	995	990	ENSMUSG00000021846	624367	14	48120823	48281575	+	GO:0001934|positive regulation of protein phosphorylation;GO:0008063|Toll signaling pathway;GO:0043410|positive regulation of MAPK cascade	NA	NA	NA|(RefSeq) glyceraldehyde-3-phosphate dehydrogenase pseudogene	NA	NA	pellino 2	down
Prrx1	-2.41607	0	0	613	619	560	3719	3291	3094	ENSMUSG00000026586	18933	1	163245119	163313710	-	GO:0000122|negative regulation of transcription by RNA polymerase II;GO:0002053|positive regulation of mesenchymal cell proliferation;GO:0006355|regulation of transcription, DNA-templated;GO:0007275|multicellular organism development;GO:0030326|embryonic	NA	NA	K09329|paired mesoderm homeobox protein	NA	NA	paired related homeobox 1	down
Prrx2	-2.08224	1.27e-12	9.03e-12	31	35	23	132	96	166	ENSMUSG00000039476	20204	2	30834972	30881251	+	GO:0006355|regulation of transcription, DNA-templated;GO:0007275|multicellular organism development	NA	NA	K09329|paired mesoderm homeobox protein	NA	NA	paired related homeobox 2	down
Trp53cor1	2.22344	4.88e-06	1.98e-05	38	48	38	6	17	5	ENSMUSG00000085912	100504267	17	29057474	29078961	-	NA	NA	NA	NA|(RefSeq) tumor protein p53 pathway corepressor 1	NA	NA	tumor protein p53 pathway corepressor 1	up
Tspan11	-2.02434	5.33e-25	7.31e-24	70	69	79	303	256	369	ENSMUSG00000030351	68498	6	127887589	127953977	+	NA	NA	GO:0016020|membrane;GO:0016021|integral component of membrane	K17352|tetraspanin-11	NA	NA	tetraspanin 11	down
Col17a1	-3.43387	1.36e-09	7.64e-09	7	2	3	44	46	46	ENSMUSG00000025064	12821	19	47646344	47692094	-	GO:0031581|hemidesmosome assembly	NA	NA	K07603|collagen, type XVII, alpha	mmu04974	Protein digestion and absorption	collagen, type XVII, alpha 1	down
Tspan15	-2.3626	0.00222025	0.00623219	7	3	0	17	22	15	ENSMUSG00000037031	70423	10	62185396	62231251	-	GO:0051604|protein maturation;GO:0072659|protein localization to plasma membrane	NA	NA	K17297|tetraspanin-15	NA	NA	tetraspanin 15	down
Masp1	-3.33809	1.47e-109	1.65e-107	64	62	60	786	639	569	ENSMUSG00000022887	17174	16	23449417	23520815	-	GO:0001867|complement activation, lectin pathway;GO:0002376|immune system process;GO:0006508|proteolysis;GO:0045087|innate immune response	NA	NA	K03992|mannan-binding lectin serine protease 1 [EC:3.4.21.-]	mmu04610|mmu05150	Complement and coagulation cascades|Staphylococcus aureus infection	mannan-binding lectin serine peptidase 1	down
Col18a1	-2.44696	1.06e-108	1.19e-106	174	141	151	963	875	842	ENSMUSG00000001435	12822	10	77052178	77166548	-	GO:0001525|angiogenesis;GO:0001886|endothelial cell morphogenesis;GO:0007155|cell adhesion;GO:0008284|positive regulation of cell population proliferation;GO:0030198|extracellular matrix organization;GO:0030335|positive regulation of cell migration;GO:200	NA	NA	K06823|collagen, type XVIII, alpha	mmu04974	Protein digestion and absorption	collagen, type XVIII, alpha 1	down
AC161376.2	4.06211	4.48e-08	2.23e-07	35	27	34	0	3	3	ENSMUSG00000116793	NA	16	31590196	31593220	-	NA	NA	NA	NA	NA	NA	novel transcript	up
Gm16897	-2.041	5.3e-07	2.39e-06	10	11	15	58	57	42	ENSMUSG00000097325	320400	1	194955759	194976960	-	NA	NA	NA	NA|(RefSeq) predicted gene, 16897	NA	NA	predicted gene, 16897	down
Tdrd9	5.61231	2.76e-05	0.000102742	21	13	16	0	0	1	ENSMUSG00000054003	74691	12	111971559	112068854	+	GO:0007140|male meiotic nuclear division;GO:0007141|male meiosis I;GO:0007275|multicellular organism development;GO:0007283|spermatogenesis;GO:0009566|fertilization;GO:0010529|negative regulation of transposition;GO:0030154|cell differentiation;GO:0031047	NA	NA	K18408|ATP-dependent RNA helicase TDRD9 [EC:3.6.4.13]	NA	NA	tudor domain containing 9	up
Mgat4a	5.1134	1.32e-05	5.09e-05	29	16	20	2	0	0	ENSMUSG00000026110	269181	1	37439340	37541016	-	GO:0006486|protein glycosylation;GO:0006487|protein N-linked glycosylation	NA	NA	K00738|alpha-1,3-mannosylglycoprotein beta-1,4-N-acetylglucosaminyltransferase A/B [EC:2.4.1.145]	mmu00510|mmu01100	N-Glycan biosynthesis|Metabolic pathways	mannoside acetylglucosaminyltransferase 4, isoenzyme A	up
Irx1	-2.39568	5.75e-87	4.27e-85	154	182	139	1051	790	807	ENSMUSG00000060969	16371	13	71957921	71963723	-	GO:0000122|negative regulation of transcription by RNA polymerase II;GO:0001656|metanephros development;GO:0006355|regulation of transcription, DNA-templated;GO:0072086|specification of loop of Henle identity;GO:0072272|proximal/distal pattern formation i	NA	NA	NA|(RefSeq) Iroquois homeobox 1	NA	NA	Iroquois homeobox 1	down
Cfap161	-4.72128	0.00125774	0.00369433	1	0	0	14	4	12	ENSMUSG00000011154	75556	7	83774101	83794880	-	GO:0008150|biological_process	NA	NA	NA|(RefSeq) cilia and flagella associated protein 161	NA	NA	cilia and flagella associated protein 161	down
Gm4951	3.26389	0.000275807	0.000900901	15	13	18	1	1	3	ENSMUSG00000073555	240327	18	60212080	60247820	+	GO:0035458|cellular response to interferon-beta	NA	NA	NA|(RefSeq) predicted gene 4951	NA	NA	predicted gene 4951	up
Gm4952	2.78629	7.85e-06	3.11e-05	28	22	35	6	1	6	ENSMUSG00000071633	240549	19	12599974	12628251	+	GO:0008150|biological_process	NA	NA	K15517|glycine N-phenylacetyltransferase [EC:2.3.1.192]	mmu00360	Phenylalanine metabolism	predicted gene 4952	up
Islr	-5.42534	4.01e-09	2.17e-08	1	0	2	55	47	35	ENSMUSG00000037206	26968	9	58156268	58204306	-	NA	NA	GO:0005576|extracellular region;GO:0005615|extracellular space	NA|(RefSeq) immunoglobulin superfamily containing leucine-rich repeat	NA	NA	immunoglobulin superfamily containing leucine-rich repeat	down
Gm4841	4.39348	6.32e-07	2.83e-06	30	27	24	0	0	4	ENSMUSG00000068606	225594	18	60268301	60273267	-	NA	NA	GO:0016020|membrane	NA|(RefSeq) predicted gene 4841	NA	NA	predicted gene 4841	up
Mfap2	5.32839	0.000572495	0.00177935	5	9	7	0	0	0	ENSMUSG00000060572	17150	4	141010418	141015984	+	GO:0048048|embryonic eye morphogenesis;GO:0048050|post-embryonic eye morphogenesis	NA	NA	NA|(RefSeq) microfibrillar-associated protein 2	NA	NA	microfibrillar-associated protein 2	up
Spock2	3.12267	6.76e-06	2.7e-05	20	21	33	4	2	3	ENSMUSG00000058297	94214	10	60106219	60135198	+	GO:0010811|positive regulation of cell-substrate adhesion;GO:0019800|peptide cross-linking via chondroitin 4-sulfate glycosaminoglycan;GO:0030198|extracellular matrix organization;GO:1990830|cellular response to leukemia inhibitory factor	NA	NA	K08136|sparc/osteonectin, cwcv and kazal-like domains proteoglycan (testican)	NA	NA	sparc/osteonectin, cwcv and kazal-like domains proteoglycan 2	up
Thsd7a	-3.03299	1.05e-100	1e-98	91	66	74	770	647	584	ENSMUSG00000032625	330267	6	12311610	12749410	-	NA	NA	GO:0005886|plasma membrane;GO:0016020|membrane;GO:0016021|integral component of membrane	NA|(RefSeq) thrombospondin, type I, domain containing 7A	NA	NA	thrombospondin, type I, domain containing 7A	down
Pla2g3	3.96461	0.000219969	0.000728373	11	12	21	2	0	1	ENSMUSG00000034579	237625	11	3488284	3499350	+	GO:0001675|acrosome assembly;GO:0006644|phospholipid metabolic process;GO:0007288|sperm axoneme assembly;GO:0019372|lipoxygenase pathway;GO:0043303|mast cell degranulation;GO:0046470|phosphatidylcholine metabolic process;GO:0048468|cell development;GO:005	NA	NA	K01047|secretory phospholipase A2 [EC:3.1.1.4]	mmu00564|mmu00565|mmu00590|mmu00591|mmu00592|mmu01100|mmu04014|mmu04270|mmu04972|mmu04975	Glycerophospholipid metabolism|Ether lipid metabolism|Arachidonic acid metabolism|Linoleic acid metabolism|alpha-Linolenic acid metabolism|Metabolic pathways|Ras signaling pathway|Vascular smooth muscle contraction|Pancreatic secretion|Fat digestion and a	phospholipase A2, group III	up
Abi3bp	2.81133	0.00130902	0.00382981	21	7	20	0	2	5	ENSMUSG00000035258	320712	16	56477878	56690135	+	GO:0010811|positive regulation of cell-substrate adhesion;GO:0030198|extracellular matrix organization	NA	NA	NA|(RefSeq) ABI gene family, member 3 (NESH) binding protein	NA	NA	ABI gene family, member 3 (NESH) binding protein	up
Armcx4	3.92354	2.65e-06	1.11e-05	17	28	27	2	0	3	ENSMUSG00000049804	100503043	X	134686519	134696757	+	GO:0008150|biological_process	NA	NA	NA|(RefSeq) armadillo repeat containing, X-linked 4	NA	NA	armadillo repeat containing, X-linked 4	up
Gm26548	-4.98034	0.00240557	0.00670171	0	0	0	12	4	3	ENSMUSG00000097094	NA	4	9267323	9269915	-	NA	NA	NA	NA	NA	NA	predicted gene, 26548	down
Fam83h	2.25099	2.71e-05	0.000100826	40	36	44	6	2	18	ENSMUSG00000046761	105732	15	76001093	76014336	-	GO:0030335|positive regulation of cell migration;GO:0031214|biomineral tissue development;GO:0044380|protein localization to cytoskeleton;GO:0045104|intermediate filament cytoskeleton organization	NA	NA	NA|(RefSeq) family with sequence similarity 83, member H	NA	NA	family with sequence similarity 83, member H	up
AC140300.3	5.51723	0.000262437	0.000859814	8	5	11	0	0	0	ENSMUSG00000116813	NA	17	4851698	4892987	-	NA	NA	NA	NA	NA	NA	novel transcript	up
Fgfbp1	5.29528	0.000117474	0.000403597	10	13	17	0	0	1	ENSMUSG00000048373	14181	5	43978858	43981779	-	GO:0007267|cell-cell signaling;GO:0008284|positive regulation of cell population proliferation;GO:0045743|positive regulation of fibroblast growth factor receptor signaling pathway;GO:0090050|positive regulation of cell migration involved in sprouting ang	NA	NA	NA|(RefSeq) fibroblast growth factor binding protein 1	NA	NA	fibroblast growth factor binding protein 1	up
Slc40a1	4.40124	1.98e-05	7.52e-05	19	25	15	3	0	0	ENSMUSG00000025993	53945	1	45908068	45926523	-	GO:0002260|lymphocyte homeostasis;GO:0003158|endothelium development;GO:0006811|ion transport;GO:0006826|iron ion transport;GO:0006879|cellular iron ion homeostasis;GO:0034395|regulation of transcription from RNA polymerase II promoter in response to iron	NA	NA	K14685|solute carrier family 40 (iron-regulated transporter), member 1	mmu04216|mmu04978	Ferroptosis|Mineral absorption	solute carrier family 40 (iron-regulated transporter), member 1	up
B230303O12Rik	2.36751	4.43e-17	4.1e-16	146	103	112	29	26	19	ENSMUSG00000106547	NA	5	146188620	146194809	-	NA	NA	NA	NA	NA	NA	RIKEN cDNA B230303O12 gene	up
Col11a2	2.15559	1.42e-21	1.67e-20	186	234	205	35	60	52	ENSMUSG00000024330	12815	17	34039437	34066685	+	GO:0001501|skeletal system development;GO:0001649|osteoblast differentiation;GO:0001894|tissue homeostasis;GO:0002062|chondrocyte differentiation;GO:0007605|sensory perception of sound;GO:0030199|collagen fibril organization;GO:0048705|skeletal system mor	NA	NA	K19721|collagen, type V/XI/XXIV/XXVII, alpha	mmu04974	Protein digestion and absorption	collagen, type XI, alpha 2	up
Itgb4	-2.86849	3.2e-27	4.82e-26	15	25	30	217	158	167	ENSMUSG00000020758	192897	11	115974709	116008412	+	GO:0006914|autophagy;GO:0007154|cell communication;GO:0007155|cell adhesion;GO:0007160|cell-matrix adhesion;GO:0007229|integrin-mediated signaling pathway;GO:0009611|response to wounding;GO:0022011|myelination in peripheral nervous system;GO:0031581|hemid	NA	NA	K06525|integrin beta 4	mmu04151|mmu04510|mmu04512|mmu04810|mmu05165|mmu05410|mmu05412|mmu05414	PI3K-Akt signaling pathway|Focal adhesion|ECM-receptor interaction|Regulation of actin cytoskeleton|Human papillomavirus infection|Hypertrophic cardiomyopathy (HCM)|Arrhythmogenic right ventricular cardiomyopathy (ARVC)|Dilated cardiomyopathy (DCM)	integrin beta 4	down
Itgb3	4.1744	5.8e-05	0.000207422	13	18	20	1	2	0	ENSMUSG00000020689	16416	11	104608000	104670476	+	GO:0001938|positive regulation of endothelial cell proliferation;GO:0001954|positive regulation of cell-matrix adhesion;GO:0002687|positive regulation of leukocyte migration;GO:0007044|cell-substrate junction assembly;GO:0007155|cell adhesion;GO:0007160|c	NA	NA	K06493|integrin beta 3	mmu04015|mmu04145|mmu04151|mmu04380|mmu04510|mmu04512|mmu04611|mmu04640|mmu04810|mmu04919|mmu05163|mmu05165|mmu05205|mmu05206|mmu05410|mmu05412|mmu05414|mmu05418	Rap1 signaling pathway|Phagosome|PI3K-Akt signaling pathway|Osteoclast differentiation|Focal adhesion|ECM-receptor interaction|Platelet activation|Hematopoietic cell lineage|Regulation of actin cytoskeleton|Thyroid hormone signaling pathway|Human cytomega	integrin beta 3	up
Slc43a2	2.38904	2.08e-05	7.88e-05	30	25	29	7	6	4	ENSMUSG00000038178	215113	11	75531694	75577575	+	GO:0015807|L-amino acid transport;GO:0055085|transmembrane transport;GO:1902475|L-alpha-amino acid transmembrane transport	NA	NA	K08229|MFS transporter, LAT3 family, solute carrier family 43, member 2	NA	NA	solute carrier family 43, member 2	up
Wdfy4	-2.14856	5.82e-06	2.34e-05	8	6	13	47	32	47	ENSMUSG00000051506	545030	14	32959547	33185508	-	NA	NA	NA	NA|(RefSeq) WD repeat and FYVE domain containing 4	NA	NA	WD repeat and FYVE domain containing 4	down
Rps7-ps2	3.16152	0.00200519	0.00567724	14	13	7	1	2	1	ENSMUSG00000112105	NA	12	3521922	3523268	-	NA	NA	NA	NA	NA	NA	ribosomal protein S7, pseudogene 2	up
5730559C18Rik	-4.02119	0.000117717	0.000404362	0	2	1	24	13	15	ENSMUSG00000041605	67313	1	136213531	136234264	-	GO:0000187|activation of MAPK activity;GO:0002221|pattern recognition receptor signaling pathway;GO:0002367|cytokine production involved in immune response;GO:0031398|positive regulation of protein ubiquitination;GO:0032494|response to peptidoglycan;GO:00	NA	NA	NA|(RefSeq) innate immunity activator	NA	NA	innate immunity activator	down
Adora2a	2.7365	0.000395651	0.00126307	19	24	14	1	7	1	ENSMUSG00000020178	11540	10	75316877	75334784	+	GO:0001963|synaptic transmission, dopaminergic;GO:0001973|adenosine receptor signaling pathway;GO:0001975|response to amphetamine;GO:0006355|regulation of transcription, DNA-templated;GO:0006469|negative regulation of protein kinase activity;GO:0007165|si	NA	NA	K04266|adenosine receptor A2a	mmu04015|mmu04020|mmu04024|mmu04080|mmu04270|mmu05012|mmu05034	Rap1 signaling pathway|Calcium signaling pathway|cAMP signaling pathway|Neuroactive ligand-receptor interaction|Vascular smooth muscle contraction|Parkinson disease|Alcoholism	adenosine A2a receptor	up
Gm18429	-5.21093	0.000913596	0.00274577	0	0	0	10	9	3	ENSMUSG00000106510	NA	3	115171629	115172049	-	NA	NA	NA	NA	NA	NA	predicted gene, 18429	down
Tex19.1	5.46476	0.000640526	0.00197395	1	8	14	0	0	0	ENSMUSG00000039329	73679	11	121146143	121148319	+	GO:0001701|in utero embryonic development;GO:0001890|placenta development;GO:0007129|synapsis;GO:0007131|reciprocal meiotic recombination;GO:0007140|male meiotic nuclear division;GO:0007283|spermatogenesis;GO:0008584|male gonad development;GO:0010529|nega	NA	NA	NA|(RefSeq) testis expressed gene 19.1	NA	NA	testis expressed gene 19.1	up
Ak5	-3.13443	3.36e-92	2.81e-90	64	50	75	641	594	519	ENSMUSG00000039058	229949	3	152462815	152668360	-	GO:0006139|nucleobase-containing compound metabolic process;GO:0006165|nucleoside diphosphate phosphorylation;GO:0009142|nucleoside triphosphate biosynthetic process;GO:0009165|nucleotide biosynthetic process;GO:0016310|phosphorylation;GO:0046034|ATP meta	NA	NA	K00939|adenylate kinase [EC:2.7.4.3]	mmu00230|mmu00730|mmu01100	Purine metabolism|Thiamine metabolism|Metabolic pathways	adenylate kinase 5	down
Ak7	4.13425	0.0012331	0.00362695	17	9	8	0	0	2	ENSMUSG00000041323	78801	12	105705976	105782447	+	GO:0006139|nucleobase-containing compound metabolic process;GO:0006165|nucleoside diphosphate phosphorylation;GO:0009142|nucleoside triphosphate biosynthetic process;GO:0046940|nucleoside monophosphate phosphorylation	NA	NA	K00939|adenylate kinase [EC:2.7.4.3]	mmu00230|mmu00730|mmu01100	Purine metabolism|Thiamine metabolism|Metabolic pathways	adenylate kinase 7	up
Pdlim2	-2.11742	5.43e-53	1.9e-51	108	106	104	566	465	430	ENSMUSG00000022090	213019	14	70164218	70177681	-	NA	NA	GO:0001725|stress fiber;GO:0005737|cytoplasm;GO:0005856|cytoskeleton;GO:0030864|cortical actin cytoskeleton	NA|(RefSeq) PDZ and LIM domain 2	NA	NA	PDZ and LIM domain 2	down
Clvs1	-5.62785	4.3e-07	1.95e-06	1	1	0	36	32	36	ENSMUSG00000041216	74438	4	9269293	9451691	+	GO:0007040|lysosome organization	NA	NA	NA|(RefSeq) clavesin 1	NA	NA	clavesin 1	down
Bgn	-2.09826	0	0	3777	3871	4039	20112	17105	15760	ENSMUSG00000031375	12111	X	73483602	73495933	+	GO:0001974|blood vessel remodeling;GO:0019800|peptide cross-linking via chondroitin 4-sulfate glycosaminoglycan	NA	NA	K08118|biglycan	NA	NA	biglycan	down
Cyp2f2	6.3957	3.51e-06	1.45e-05	9	13	22	0	0	0	ENSMUSG00000052974	13107	7	27119909	27133660	+	GO:0009636|response to toxic substance;GO:0018931|naphthalene metabolic process;GO:0018979|trichloroethylene metabolic process;GO:0055114|oxidation-reduction process	NA	NA	K07416|cytochrome P450 family 2 subfamily F [EC:1.14.14.1]	mmu00980	Metabolism of xenobiotics by cytochrome P450	cytochrome P450, family 2, subfamily f, polypeptide 2	up
Adra1b	-3.46139	9.2e-13	6.6e-12	9	6	2	65	56	75	ENSMUSG00000050541	11548	11	43774606	43901210	-	GO:0006937|regulation of muscle contraction;GO:0007165|signal transduction;GO:0007186|G protein-coupled receptor signaling pathway;GO:0019229|regulation of vasoconstriction;GO:0043410|positive regulation of MAPK cascade;GO:0055117|regulation of cardiac mu	NA	NA	K04136|adrenergic receptor alpha-1B	mmu04020|mmu04022|mmu04080|mmu04261|mmu04270|mmu04970	Calcium signaling pathway|cGMP-PKG signaling pathway|Neuroactive ligand-receptor interaction|Adrenergic signaling in cardiomyocytes|Vascular smooth muscle contraction|Salivary secretion	adrenergic receptor, alpha 1b	down
Gm18609	2.60838	0.00109783	0.00325639	24	10	19	0	6	3	ENSMUSG00000107810	NA	6	128185277	128188877	+	NA	NA	NA	NA	NA	NA	predicted gene, 18609	up
Eno3	-2.66192	3.62e-55	1.32e-53	69	53	71	530	379	386	ENSMUSG00000060600	13808	11	70657202	70662513	+	GO:0006096|glycolytic process;GO:0007568|aging;GO:0042493|response to drug;GO:0043403|skeletal muscle tissue regeneration	NA	NA	K01689|enolase [EC:4.2.1.11]	mmu00010|mmu01100|mmu01200|mmu01230|mmu03018|mmu04066	Glycolysis / Gluconeogenesis|Metabolic pathways|Carbon metabolism|Biosynthesis of amino acids|RNA degradation|HIF-1 signaling pathway	enolase 3, beta muscle	down
Clu	3.94296	1.34e-13	1.01e-12	44	82	62	7	2	4	ENSMUSG00000022037	12759	14	65968483	65981547	+	GO:0000902|cell morphogenesis;GO:0001774|microglial cell activation;GO:0008284|positive regulation of cell population proliferation;GO:0009615|response to virus;GO:0010628|positive regulation of gene expression;GO:0017038|protein import;GO:0031018|endocri	NA	NA	K17252|clusterin	mmu04610	Complement and coagulation cascades	clusterin	up
Rnf43	5.45856	0.000315136	0.00102056	6	8	9	0	0	0	ENSMUSG00000034177	207742	11	87662722	87735539	+	GO:0006511|ubiquitin-dependent protein catabolic process;GO:0007275|multicellular organism development;GO:0016055|Wnt signaling pathway;GO:0016567|protein ubiquitination;GO:0030178|negative regulation of Wnt signaling pathway;GO:0038018|Wnt receptor catab	NA	NA	K15694|RING finger protein 43 [EC:2.3.2.27]	NA	NA	ring finger protein 43	up
Cth	-2.53693	1.73e-105	1.78e-103	152	147	151	996	1004	763	ENSMUSG00000028179	107869	3	157894248	157925077	-	GO:0006749|glutathione metabolic process;GO:0008285|negative regulation of cell population proliferation;GO:0008652|cellular amino acid biosynthetic process;GO:0018272|protein-pyridoxal-5-phosphate linkage via peptidyl-N6-pyridoxal phosphate-L-lysine;GO:0	NA	NA	K01758|cystathionine gamma-lyase [EC:4.4.1.1]	mmu00260|mmu00270|mmu00450|mmu01100|mmu01230	Glycine, serine and threonine metabolism|Cysteine and methionine metabolism|Selenocompound metabolism|Metabolic pathways|Biosynthesis of amino acids	cystathionase (cystathionine gamma-lyase)	down
Gpm6b	-2.17642	0.000223634	0.000740254	8	6	4	36	37	14	ENSMUSG00000031342	14758	X	166238911	166388988	+	GO:0001503|ossification;GO:0015031|protein transport;GO:0030501|positive regulation of bone mineralization;GO:0032956|regulation of actin cytoskeleton organization;GO:0051612|negative regulation of serotonin uptake;GO:0051893|regulation of focal adhesion	NA	NA	NA|(RefSeq) glycoprotein m6b	NA	NA	glycoprotein m6b	down
Txndc2	2.22857	0.00246373	0.00684298	17	17	15	2	7	2	ENSMUSG00000050612	213272	17	65637505	65642204	-	GO:0006662|glycerol ether metabolic process;GO:0045454|cell redox homeostasis;GO:0055114|oxidation-reduction process	NA	NA	NA|(RefSeq) thioredoxin domain containing 2 (spermatozoa)	NA	NA	thioredoxin domain containing 2 (spermatozoa)	up
Dcn	-3.48769	3.08e-31	5.41e-30	14	11	18	200	178	134	ENSMUSG00000019929	13179	10	97479609	97518143	+	GO:0001822|kidney development;GO:0001890|placenta development;GO:0007519|skeletal muscle tissue development;GO:0007568|aging;GO:0009612|response to mechanical stimulus;GO:0010508|positive regulation of autophagy;GO:0010596|negative regulation of endotheli	NA	NA	K04660|decorin	mmu04350|mmu05205	TGF-beta signaling pathway|Proteoglycans in cancer	decorin	down
Gm6650	5.63542	0.000139392	0.000474092	7	10	9	0	0	0	ENSMUSG00000090793	NA	5	13811242	13814452	+	NA	NA	NA	NA	NA	NA	predicted gene 6650	up
Htr2a	3.22467	0.000146592	0.000496828	22	22	10	1	1	4	ENSMUSG00000034997	15558	14	74640840	74709494	+	GO:0001659|temperature homeostasis;GO:0006874|cellular calcium ion homeostasis;GO:0007165|signal transduction;GO:0007186|G protein-coupled receptor signaling pathway;GO:0007202|activation of phospholipase C activity;GO:0007204|positive regulation of cytos	NA	NA	K04157|5-hydroxytryptamine receptor 2	mmu04020|mmu04080|mmu04540|mmu04726|mmu04750	Calcium signaling pathway|Neuroactive ligand-receptor interaction|Gap junction|Serotonergic synapse|Inflammatory mediator regulation of TRP channels	5-hydroxytryptamine (serotonin) receptor 2A	up
Arhgef19	-2.12244	9.55e-13	6.84e-12	32	20	21	149	96	93	ENSMUSG00000028919	213649	4	141239499	141257564	+	GO:0032956|regulation of actin cytoskeleton organization;GO:0035023|regulation of Rho protein signal transduction;GO:0042060|wound healing;GO:0043547|positive regulation of GTPase activity	NA	NA	K20691|Rho guanine nucleotide exchange factor 19	NA	NA	Rho guanine nucleotide exchange factor (GEF) 19	down
Gm43314	-2.52842	1.4e-06	6.06e-06	6	11	3	49	47	27	ENSMUSG00000104528	NA	3	157894961	157897191	-	NA	NA	NA	NA	NA	NA	predicted gene 43314	down
Epgn	5.10171	0.00144139	0.004186	7	7	4	0	0	0	ENSMUSG00000035020	71920	5	91027464	91035215	+	GO:0000165|MAPK cascade;GO:0000187|activation of MAPK activity;GO:0001525|angiogenesis;GO:0008284|positive regulation of cell population proliferation;GO:0043406|positive regulation of MAP kinase activity;GO:0045741|positive regulation of epidermal growth	NA	NA	NA|(RefSeq) epithelial mitogen	NA	NA	epithelial mitogen	up
5430430B14Rik	2.8837	2.89e-09	1.59e-08	66	53	42	5	15	3	ENSMUSG00000109953	NA	8	27279441	27281070	+	NA	NA	NA	NA	NA	NA	RIKEN cDNA 5430430B14 gene	up
Ripor2	-2.73524	1.06e-07	5.08e-07	6	10	5	28	61	56	ENSMUSG00000036006	193385	13	24582189	24733816	+	GO:0006935|chemotaxis;GO:0007155|cell adhesion;GO:0007162|negative regulation of cell adhesion;GO:0007517|muscle organ development;GO:0007605|sensory perception of sound;GO:0009968|negative regulation of signal transduction;GO:0030154|cell differentiation	NA	NA	NA|(RefSeq) RHO family interacting cell polarization regulator 2	NA	NA	RHO family interacting cell polarization regulator 2	down
D630039A03Rik	5.49608	4.83e-05	0.000174727	14	20	12	0	0	1	ENSMUSG00000052117	242484	4	57908483	57916297	-	GO:0008150|biological_process	NA	NA	NA|(RefSeq) RIKEN cDNA D630039A03 gene	NA	NA	RIKEN cDNA D630039A03 gene	up
Rab3c	-2.60233	1.22e-22	1.5e-21	29	20	21	169	142	138	ENSMUSG00000021700	67295	13	110054187	110280996	-	GO:0015031|protein transport;GO:0017157|regulation of exocytosis;GO:0019882|antigen processing and presentation	NA	NA	K07883|Ras-related protein Rab-3C	NA	NA	RAB3C, member RAS oncogene family	down
Cyp26b1	-2.69871	1.49e-37	3.37e-36	34	37	38	296	235	219	ENSMUSG00000063415	232174	6	84571414	84593908	-	GO:0001709|cell fate determination;GO:0001768|establishment of T cell polarity;GO:0001822|kidney development;GO:0006805|xenobiotic metabolic process;GO:0006954|inflammatory response;GO:0007140|male meiotic nuclear division;GO:0007283|spermatogenesis;GO:00	NA	NA	K12664|cytochrome P450 family 26 subfamily B	mmu00830|mmu01100	Retinol metabolism|Metabolic pathways	cytochrome P450, family 26, subfamily b, polypeptide 1	down
Rpl13a	-2.18217	4.81e-29	7.74e-28	54	54	54	310	270	201	ENSMUSG00000074129	22121	7	45125558	45128761	-	GO:0006412|translation;GO:0006417|regulation of translation;GO:0017148|negative regulation of translation;GO:0032496|response to lipopolysaccharide;GO:0042592|homeostatic process;GO:0048246|macrophage chemotaxis;GO:0060425|lung morphogenesis;GO:0071346|ce	NA	NA	K02872|large subunit ribosomal protein L13Ae	mmu03010	Ribosome	ribosomal protein L13A	down
Fn1	-2.65583	0	0	5821	5713	5977	45644	37158	34174	ENSMUSG00000026193	14268	1	71585520	71653200	-	GO:0001525|angiogenesis;GO:0001775|cell activation;GO:0001932|regulation of protein phosphorylation;GO:0006953|acute-phase response;GO:0007044|cell-substrate junction assembly;GO:0007155|cell adhesion;GO:0007160|cell-matrix adhesion;GO:0007161|calcium-ind	NA	NA	K05717|fibronectin 1	mmu04151|mmu04510|mmu04512|mmu04810|mmu04933|mmu05100|mmu05146|mmu05165|mmu05200|mmu05205|mmu05222	PI3K-Akt signaling pathway|Focal adhesion|ECM-receptor interaction|Regulation of actin cytoskeleton|AGE-RAGE signaling pathway in diabetic complications|Bacterial invasion of epithelial cells|Amoebiasis|Human papillomavirus infection|Pathways in cancer|Pr	fibronectin 1	down
Fos	2.97208	4.24e-33	8.09e-32	924	1044	793	107	109	151	ENSMUSG00000021250	14281	12	85473890	85477273	+	GO:0001661|conditioned taste aversion;GO:0006355|regulation of transcription, DNA-templated;GO:0006357|regulation of transcription by RNA polymerase II;GO:0006366|transcription by RNA polymerase II;GO:0007179|transforming growth factor beta receptor signa	NA	NA	K04379|proto-oncogene protein c-fos	mmu01522|mmu04010|mmu04024|mmu04210|mmu04380|mmu04620|mmu04657|mmu04658|mmu04659|mmu04660|mmu04662|mmu04668|mmu04713|mmu04725|mmu04728|mmu04915|mmu04917|mmu04921|mmu04926|mmu04928|mmu05031|mmu05132|mmu05133|mmu05140|mmu05142|mmu05161|mmu05166|mmu05167|mmu	Endocrine resistance|MAPK signaling pathway|cAMP signaling pathway|Apoptosis|Osteoclast differentiation|Toll-like receptor signaling pathway|IL-17 signaling pathway|Th1 and Th2 cell differentiation|Th17 cell differentiation|T cell receptor signaling pathw	FBJ osteosarcoma oncogene	up
Gm43921	-2.1117	1.74e-23	2.24e-22	75	39	46	280	240	211	ENSMUSG00000107603	NA	6	4506087	4507878	+	NA	NA	NA	NA	NA	NA	predicted gene, 43921	down
Ereg	2.3449	4.99e-57	1.88e-55	523	540	708	145	110	114	ENSMUSG00000029377	13874	5	91074622	91093646	+	GO:0001525|angiogenesis;GO:0001550|ovarian cumulus expansion;GO:0001556|oocyte maturation;GO:0001819|positive regulation of cytokine production;GO:0007143|female meiotic nuclear division;GO:0007173|epidermal growth factor receptor signaling pathway;GO:000	NA	NA	K09784|epiregulin	mmu04010|mmu04012|mmu04151|mmu05210	MAPK signaling pathway|ErbB signaling pathway|PI3K-Akt signaling pathway|Colorectal cancer	epiregulin	up
Aff3	-4.94769	2.5e-05	9.36e-05	0	0	2	25	15	25	ENSMUSG00000037138	16764	1	38177326	38664955	-	GO:0034612|response to tumor necrosis factor;GO:0035116|embryonic hindlimb morphogenesis	NA	NA	K15195|AF4/FMR2 family member 3	NA	NA	AF4/FMR2 family, member 3	down
Palm2	-3.55156	0.000245669	0.000807928	3	1	0	23	15	12	ENSMUSG00000090053	242481	4	57434247	57712016	+	GO:0008150|biological_process;GO:0008360|regulation of cell shape	NA	NA	K16519|A-kinase anchor protein 2	NA	NA	paralemmin 2	down
Gm6329	2.10162	0.00153593	0.00443651	20	25	16	7	1	7	ENSMUSG00000110231	622523	8	45160494	45165219	-	NA	NA	NA	NA|(RefSeq) predicted gene 6329	NA	NA	predicted gene 6329	up
Gm43682	-2.29325	0.000302534	0.000982713	5	5	6	52	14	19	ENSMUSG00000107019	NA	5	93176970	93179059	+	NA	NA	NA	NA	NA	NA	predicted gene 43682	down
Shank1	2.41971	8.47e-05	0.000297545	29	20	22	5	5	4	ENSMUSG00000038738	243961	7	44310253	44360572	+	GO:0007399|nervous system development;GO:0007616|long-term memory;GO:0008306|associative learning;GO:0030154|cell differentiation;GO:0030534|adult behavior;GO:0032232|negative regulation of actin filament bundle assembly;GO:0035176|social behavior;GO:0035	NA	NA	K15009|SH3 and multiple ankyrin repeat domains protein	mmu04724	Glutamatergic synapse	SH3 and multiple ankyrin repeat domains 1	up
Ryr3	-2.41392	2.94e-06	1.23e-05	7	9	5	60	31	29	ENSMUSG00000057378	20192	2	112631355	113217096	-	GO:0006811|ion transport;GO:0006816|calcium ion transport;GO:0006874|cellular calcium ion homeostasis;GO:0006941|striated muscle contraction;GO:0051209|release of sequestered calcium ion into cytosol;GO:0051289|protein homotetramerization;GO:0051481|negat	NA	NA	K04963|ryanodine receptor 3	mmu04020|mmu04371|mmu04713|mmu04921|mmu04970|mmu05010	Calcium signaling pathway|Apelin signaling pathway|Circadian entrainment|Oxytocin signaling pathway|Salivary secretion|Alzheimer disease	ryanodine receptor 3	down
Atp8a2	4.97261	0.000435735	0.00137985	9	11	12	1	0	0	ENSMUSG00000021983	108168164	14	59638540	60197179	-	GO:0003011|involuntary skeletal muscle contraction;GO:0006869|lipid transport;GO:0007409|axonogenesis;GO:0007568|aging;GO:0010842|retina layer formation;GO:0010976|positive regulation of neuron projection development;GO:0010996|response to auditory stimul	NA	NA	NA|(RefSeq) uncharacterized LOC108168164	NA	NA	ATPase, aminophospholipid transporter-like, class I, type 8A, member 2	up
AU018091	4.73116	7.77e-12	5.16e-11	53	57	41	2	2	2	ENSMUSG00000054753	245128	7	3154658	3169203	-	GO:0006865|amino acid transport;GO:0055085|transmembrane transport;GO:1903401|L-lysine transmembrane transport	NA	NA	K13865|solute carrier family 7 (cationic amino acid transporter), member 3	NA	NA	expressed sequence AU018091	up
Jag2	2.44347	5.19e-05	0.000186838	33	25	19	6	6	3	ENSMUSG00000002799	16450	12	112907819	112929776	-	GO:0001501|skeletal system development;GO:0001701|in utero embryonic development;GO:0001709|cell fate determination;GO:0003016|respiratory system process;GO:0007154|cell communication;GO:0007219|Notch signaling pathway;GO:0007275|multicellular organism de	NA	NA	K21635|jagged-2	mmu01522|mmu04330|mmu04658|mmu05200|mmu05224	Endocrine resistance|Notch signaling pathway|Th1 and Th2 cell differentiation|Pathways in cancer|Breast cancer	jagged 2	up
5330425B07Rik	-5.0151	0.000497293	0.00156248	0	1	0	12	4	20	ENSMUSG00000105729	NA	3	116148110	116149136	+	NA	NA	NA	NA	NA	NA	RIKEN cDNA 5330425B07 gene	down
Gm43703	-2.57209	6.26e-09	3.34e-08	10	9	8	82	52	38	ENSMUSG00000105699	NA	5	140605789	140606551	-	NA	NA	NA	NA	NA	NA	predicted gene 43703	down
Ifi27l2a	-2.44295	2.39e-15	2e-14	11	29	24	114	129	123	ENSMUSG00000079017	76933	12	103442167	103443680	-	GO:0007568|aging;GO:0009615|response to virus	NA	NA	NA|(RefSeq) interferon, alpha-inducible protein 27 like 2A	NA	NA	interferon, alpha-inducible protein 27 like 2A	down
Timp3	-4.31221	0	0	166	164	183	3894	3654	3219	ENSMUSG00000020044	21859	10	86300372	86349506	+	GO:0010466|negative regulation of peptidase activity;GO:0045861|negative regulation of proteolysis;GO:0051045|negative regulation of membrane protein ectodomain proteolysis;GO:0070373|negative regulation of ERK1 and ERK2 cascade;GO:0071310|cellular respon	NA	NA	K16866|metalloproteinase inhibitor 3	mmu05205|mmu05206	Proteoglycans in cancer|MicroRNAs in cancer	tissue inhibitor of metalloproteinase 3	down
Etl4	2.86159	0.000242322	0.000797464	22	17	23	1	8	0	ENSMUSG00000036617	208618	2	19909780	20810713	+	GO:0007275|multicellular organism development;GO:0048706|embryonic skeletal system development	NA	NA	NA|(RefSeq) enhancer trap locus 4	NA	NA	enhancer trap locus 4	up
Gm6133	-4.48175	0.00276813	0.00761827	0	0	1	15	6	5	ENSMUSG00000090451	NA	18	78349754	78350701	+	GO:0006412|translation	NA	NA	NA	NA	NA	predicted gene 6133	down
Gm6166	-2.15136	2.58e-86	1.9e-84	228	305	343	1502	1408	1209	ENSMUSG00000074280	NA	9	57483963	57484371	+	NA	NA	NA	NA	NA	NA	predicted gene 6166	down
Plekhs1	-2.04636	6.61e-06	2.65e-05	6	13	11	43	52	36	ENSMUSG00000035818	226245	19	56461640	56486752	+	GO:0008150|biological_process	NA	NA	NA|(RefSeq) pleckstrin homology domain containing, family S member 1	NA	NA	pleckstrin homology domain containing, family S member 1	down
Lncenc1	2.63065	2.68e-12	1.86e-11	85	69	74	13	20	6	ENSMUSG00000078952	100039691	13	97434970	97497007	+	NA	NA	NA	NA|(RefSeq) long non-coding RNA, embryonic stem cells expressed 1	NA	NA	long non-coding RNA, embryonic stem cells expressed 1	up
Pla2g4c-ps	2.49763	0.000240989	0.000793349	23	25	17	1	7	4	ENSMUSG00000108293	NA	7	13361111	13386695	+	NA	NA	NA	NA	NA	NA	phospholipase A2, group IVC (cytosolic, calcium-independent), pseudogene	up
Snord55	-2.18682	0.00301739	0.00825132	4	3	3	17	16	15	ENSMUSG00000092680	100216533	4	117155770	117155848	-	NA	NA	NA	NA|(RefSeq) small nucleolar RNA, C/D box 55	NA	NA	small nucleolar RNA, C/D box 55	down
Gm33280	2.44484	7.45e-11	4.62e-10	67	56	78	13	16	10	ENSMUSG00000102202	NA	1	36132042	36138746	+	NA	NA	NA	NA	NA	NA	predicted gene, 33280	up
Tmem179	3.4627	1.06e-06	4.62e-06	20	25	38	3	4	1	ENSMUSG00000054013	104885	12	112500189	112516747	-	GO:0008150|biological_process	NA	NA	NA|(RefSeq) transmembrane protein 179	NA	NA	transmembrane protein 179	up
Hydin	4.48973	0.00314874	0.00858497	12	8	3	0	1	0	ENSMUSG00000059854	244653	8	110266977	110610253	+	GO:0002064|epithelial cell development;GO:0003341|cilium movement;GO:0007275|multicellular organism development;GO:0007420|brain development;GO:0021591|ventricular system development;GO:0060438|trachea development;GO:1904158|axonemal central apparatus ass	NA	NA	K17570|hydrocephalus-inducing protein	NA	NA	HYDIN, axonemal central pair apparatus protein	up
Tmem119	-2.62464	1.81e-38	4.19e-37	47	48	49	298	278	354	ENSMUSG00000054675	231633	5	113793729	113800516	-	GO:0001503|ossification;GO:0001649|osteoblast differentiation;GO:0007283|spermatogenesis;GO:0030154|cell differentiation;GO:0030501|positive regulation of bone mineralization;GO:0031214|biomineral tissue development;GO:0033690|positive regulation of osteo	NA	NA	NA|(RefSeq) transmembrane protein 119	NA	NA	transmembrane protein 119	down
Plekha7	6.45751	1.87e-06	8.01e-06	14	17	15	0	0	0	ENSMUSG00000045659	233765	7	116123485	116308376	-	GO:0044331|cell-cell adhesion mediated by cadherin;GO:0045218|zonula adherens maintenance;GO:0090136|epithelial cell-cell adhesion	NA	NA	NA|(RefSeq) pleckstrin homology domain containing, family A member 7	NA	NA	pleckstrin homology domain containing, family A member 7	up
Evpl	4.39374	1.6e-05	6.1e-05	13	20	27	0	2	1	ENSMUSG00000034282	14027	11	116220559	116238077	-	GO:0008544|epidermis development;GO:0018149|peptide cross-linking;GO:0030216|keratinocyte differentiation;GO:0031424|keratinization	NA	NA	K10383|envoplakin	NA	NA	envoplakin	up
Npr3	-2.89603	5.07e-64	2.31e-62	68	65	97	784	594	449	ENSMUSG00000022206	18162	15	11839896	11907287	-	GO:0001501|skeletal system development;GO:0002158|osteoclast proliferation;GO:0007193|adenylate cyclase-inhibiting G protein-coupled receptor signaling pathway;GO:0007194|negative regulation of adenylate cyclase activity;GO:0007200|phospholipase C-activat	NA	NA	K12325|atrial natriuretic peptide clearance receptor	NA	NA	natriuretic peptide receptor 3	down
Reps2	8.92064	2.16e-13	1.61e-12	90	65	99	0	0	0	ENSMUSG00000040855	194590	X	162411954	162643649	-	NA	GO:0005509|calcium ion binding	NA	K20068|RalBP1-associated Eps domain-containing protein	NA	NA	RALBP1 associated Eps domain containing protein 2	up
Snora31	2.29846	0.00021164	0.000701999	26	19	40	6	1	11	ENSMUSG00000065147	100303751	14	75847905	75848034	+	NA	NA	NA	NA|(RefSeq) small nucleolar RNA, H/ACA box 31	NA	NA	small nucleolar RNA, H/ACA box 31	up
Chst1	-2.03976	5.46e-23	6.85e-22	55	45	48	263	191	191	ENSMUSG00000027221	76969	2	92599707	92615250	+	GO:0005975|carbohydrate metabolic process;GO:0006012|galactose metabolic process;GO:0006790|sulfur compound metabolic process;GO:0006954|inflammatory response;GO:0042339|keratan sulfate metabolic process	NA	NA	K01022|keratan sulfate 6-sulfotransferase 1 [EC:2.8.2.21]	mmu00533	Glycosaminoglycan biosynthesis - keratan sulfate	carbohydrate sulfotransferase 1	down
Chst3	-2.99694	3.19e-10	1.89e-09	6	4	9	55	57	48	ENSMUSG00000057337	53374	10	60181532	60219260	-	GO:0005975|carbohydrate metabolic process;GO:0006790|sulfur compound metabolic process;GO:0030206|chondroitin sulfate biosynthetic process;GO:0043029|T cell homeostasis;GO:0051272|positive regulation of cellular component movement	NA	NA	K01020|chondroitin 6-sulfotransferase 3 [EC:2.8.2.17]	mmu00532	Glycosaminoglycan biosynthesis - chondroitin sulfate / dermatan sulfate	carbohydrate sulfotransferase 3	down
Efemp1	-2.5585	0	0	2622	2542	2634	17417	16265	14815	ENSMUSG00000020467	216616	11	28853204	28926743	+	GO:0006355|regulation of transcription, DNA-templated;GO:0007173|epidermal growth factor receptor signaling pathway;GO:0008284|positive regulation of cell population proliferation;GO:0010469|regulation of signaling receptor activity;GO:0010977|negative re	NA	NA	K18262|EGF-containing fibulin-like extracellular matrix protein 1	NA	NA	epidermal growth factor-containing fibulin-like extracellular matrix protein 1	down
Lox	-5.04634	0	0	1286	1149	1495	49848	44297	42930	ENSMUSG00000024529	16948	18	52516069	52529867	-	GO:0001568|blood vessel development;GO:0007507|heart development;GO:0009725|response to hormone;GO:0030199|collagen fibril organization;GO:0030324|lung development;GO:0035904|aorta development;GO:0042060|wound healing;GO:0042493|response to drug;GO:004825	NA	NA	K00277|protein-lysine 6-oxidase [EC:1.4.3.13]	NA	NA	lysyl oxidase	down
Cdh26	-5.87989	2.06e-44	5.78e-43	4	6	4	313	252	303	ENSMUSG00000039155	381409	2	178430531	178487366	+	GO:0007155|cell adhesion;GO:0007156|homophilic cell adhesion via plasma membrane adhesion molecules;GO:0035710|CD4-positive, alpha-beta T cell activation;GO:0098609|cell-cell adhesion	NA	NA	K22658|cadherin 26	NA	NA	cadherin-like 26	down
Mcc	-2.11651	8.83e-112	1.03e-109	266	241	264	1288	1101	1138	ENSMUSG00000071856	328949	18	44425060	44812182	-	GO:0010633|negative regulation of epithelial cell migration;GO:0045184|establishment of protein localization;GO:0050680|negative regulation of epithelial cell proliferation;GO:0090090|negative regulation of canonical Wnt signaling pathway	NA	NA	NA|(RefSeq) mutated in colorectal cancers	NA	NA	mutated in colorectal cancers	down
Atp2a3	-2.48629	3.23e-11	2.06e-10	9	13	14	77	68	68	ENSMUSG00000020788	53313	11	72961169	72993044	+	GO:0006811|ion transport;GO:0006816|calcium ion transport;GO:0032469|endoplasmic reticulum calcium ion homeostasis;GO:0070588|calcium ion transmembrane transport;GO:0099132|ATP hydrolysis coupled cation transmembrane transport;GO:1902600|proton transmembr	NA	NA	K05853|Ca2+ transporting ATPase, sarcoplasmic/endoplasmic reticulum [EC:3.6.3.8]	mmu04020|mmu04022|mmu04972|mmu05010	Calcium signaling pathway|cGMP-PKG signaling pathway|Pancreatic secretion|Alzheimer disease	ATPase, Ca++ transporting, ubiquitous	down
Il1rl1	-4.68905	1.17e-46	3.48e-45	5	13	9	281	230	226	ENSMUSG00000026069	17082	1	40429570	40465415	+	GO:0002826|negative regulation of T-helper 1 type immune response;GO:0007165|signal transduction;GO:0008285|negative regulation of cell population proliferation;GO:0019221|cytokine-mediated signaling pathway;GO:0032689|negative regulation of interferon-ga	NA	NA	K05171|interleukin 1 receptor-like 1	mmu04060	Cytokine-cytokine receptor interaction	interleukin 1 receptor-like 1	down
Parvg	2.95488	1.42e-05	5.47e-05	34	22	18	2	5	3	ENSMUSG00000022439	64099	15	84324026	84342978	+	GO:0007155|cell adhesion;GO:0031532|actin cytoskeleton reorganization	NA	NA	K06275|parvin	mmu04510	Focal adhesion	parvin, gamma	up
Mn1	-2.89999	7.15e-138	1.16e-135	116	133	110	1055	919	859	ENSMUSG00000070576	433938	5	111417362	111457033	+	GO:0001957|intramembranous ossification;GO:0006355|regulation of transcription, DNA-templated;GO:0007275|multicellular organism development	NA	NA	K22543|transcriptional activator MN1	NA	NA	meningioma 1	down
Hist1h2bk	-2.52432	9.63e-05	0.000335684	1	8	4	36	23	21	ENSMUSG00000062727	319184	13	22035870	22036345	+	GO:0002227|innate immune response in mucosa;GO:0019731|antibacterial humoral response;GO:0031640|killing of cells of other organism;GO:0050829|defense response to Gram-negative bacterium;GO:0050830|defense response to Gram-positive bacterium;GO:0061844|an	NA	NA	K11252|histone H2B	mmu05034|mmu05203|mmu05322	Alcoholism|Viral carcinogenesis|Systemic lupus erythematosus	histone cluster 1, H2bk	down
Mt2	2.53365	0.00077016	0.00234277	30	15	10	3	5	2	ENSMUSG00000031762	17750	8	94172664	94173568	+	GO:0006882|cellular zinc ion homeostasis;GO:0007263|nitric oxide mediated signal transduction;GO:0009617|response to bacterium;GO:0010273|detoxification of copper ion;GO:0045926|negative regulation of growth;GO:0071294|cellular response to zinc ion	NA	NA	K14739|metallothionein 1/2	mmu04978	Mineral absorption	metallothionein 2	up
Ddah2	-2.11575	3.11e-60	1.29e-58	119	120	119	609	550	482	ENSMUSG00000007039	51793	17	35059035	35062095	+	GO:0000052|citrulline metabolic process;GO:0006525|arginine metabolic process;GO:0006527|arginine catabolic process;GO:0045429|positive regulation of nitric oxide biosynthetic process	NA	NA	K01482|dimethylargininase [EC:3.5.3.18]	NA	NA	dimethylarginine dimethylaminohydrolase 2	down
Mx2	3.05944	0.00032186	0.00104076	17	18	12	3	2	1	ENSMUSG00000023341	17858	16	97535308	97560900	+	GO:0002376|immune system process;GO:0009615|response to virus;GO:0034340|response to type I interferon;GO:0045071|negative regulation of viral genome replication;GO:0045087|innate immune response;GO:0051607|defense response to virus	NA	NA	K14754|interferon-induced GTP-binding protein Mx1	mmu05162|mmu05164|mmu05165	Measles|Influenza A|Human papillomavirus infection	MX dynamin-like GTPase 2	up
Cdk15	3.89037	4.6e-06	1.87e-05	21	31	18	1	4	0	ENSMUSG00000026023	271697	1	59256906	59352993	+	GO:0006468|protein phosphorylation;GO:0016310|phosphorylation;GO:0051726|regulation of cell cycle	NA	NA	K15594|cyclin-dependent kinase 15 [EC:2.7.11.22]	NA	NA	cyclin-dependent kinase 15	up
9330102E08Rik	2.94516	1.23e-07	5.86e-07	42	41	26	6	6	3	ENSMUSG00000107879	330427	6	128169704	128183803	-	NA	NA	NA	NA|(RefSeq) RIKEN cDNA 9330102E08 gene	NA	NA	RIKEN cDNA 9330102E08 gene	up
Dnah10	2.13006	0.000336652	0.00108441	36	18	24	11	3	5	ENSMUSG00000038011	56087	5	124725085	124834308	+	GO:0003341|cilium movement;GO:0007018|microtubule-based movement	NA	NA	K10408|dynein heavy chain, axonemal	mmu05016	Huntington disease	dynein, axonemal, heavy chain 10	up
Dnah12	5.02192	0.00190587	0.00541752	5	7	5	0	0	0	ENSMUSG00000021879	110083	14	26693274	26891703	+	GO:0007018|microtubule-based movement	NA	NA	K10408|dynein heavy chain, axonemal	mmu05016	Huntington disease	dynein, axonemal, heavy chain 12	up
Btn1a1	3.05012	0.00118669	0.0034995	13	12	14	3	0	2	ENSMUSG00000000706	12231	13	23456992	23465901	-	GO:0031324|negative regulation of cellular metabolic process;GO:0046007|negative regulation of activated T cell proliferation;GO:0050710|negative regulation of cytokine secretion	NA	NA	K06712|butyrophilin	NA	NA	butyrophilin, subfamily 1, member A1	up
Nyx	5.16073	5.28e-19	5.44e-18	94	93	84	4	0	4	ENSMUSG00000051228	236690	X	13466110	13489313	+	GO:0007601|visual perception;GO:0050896|response to stimulus	NA	NA	K08129|nyctalopin	NA	NA	nyctalopin	up
Gcnt2	2.65794	5.7e-35	1.16e-33	243	207	247	32	43	41	ENSMUSG00000021360	14538	13	40859754	40960892	+	GO:0006486|protein glycosylation;GO:0007179|transforming growth factor beta receptor signaling pathway;GO:0008284|positive regulation of cell population proliferation;GO:0010608|posttranscriptional regulation of gene expression;GO:0010718|positive regulat	NA	NA	K00742|N-acetyllactosaminide beta-1,6-N-acetylglucosaminyltransferase [EC:2.4.1.150]	mmu00601|mmu01100	Glycosphingolipid biosynthesis - lacto and neolacto series|Metabolic pathways	glucosaminyl (N-acetyl) transferase 2, I-branching enzyme	up
Gm43109	-3.52696	0.00139321	0.00405461	1	1	1	16	14	7	ENSMUSG00000104653	NA	3	116128451	116141016	+	NA	NA	NA	NA	NA	NA	predicted gene 43109	down
3110039M20Rik	-2.2121	1.26e-05	4.88e-05	10	2	13	46	34	42	ENSMUSG00000104861	67293	12	49389652	49407360	+	NA	NA	NA	NA|(RefSeq) RIKEN cDNA 3110039M20 gene	NA	NA	RIKEN cDNA 3110039M20 gene	down
Ogn	-4.54936	3.05e-77	1.85e-75	17	14	20	472	370	418	ENSMUSG00000021390	18295	13	49608046	49624501	+	GO:0010469|regulation of signaling receptor activity	NA	NA	K08126|osteoglycin (osteoinductive factor, mimecan)	NA	NA	osteoglycin	down
Ntn1	-3.21449	5.7e-06	2.3e-05	2	4	2	31	29	19	ENSMUSG00000020902	18208	11	68209364	68400823	-	GO:0001764|neuron migration;GO:0006915|apoptotic process;GO:0006930|substrate-dependent cell migration, cell extension;GO:0007097|nuclear migration;GO:0007265|Ras protein signal transduction;GO:0007409|axonogenesis;GO:0007411|axon guidance;GO:0008284|posi	NA	NA	K06843|netrin 1	mmu04360	Axon guidance	netrin 1	down
Omd	-4.4719	1.77e-10	1.06e-09	2	3	1	48	43	49	ENSMUSG00000048368	27047	13	49582462	49592822	+	GO:0007155|cell adhesion;GO:0030500|regulation of bone mineralization	NA	NA	K08124|osteomodulin	NA	NA	osteomodulin	down
Ltbp4	-2.13669	1.19e-42	3.15e-41	72	90	86	413	387	352	ENSMUSG00000040488	108075	7	27305136	27337692	-	GO:0007179|transforming growth factor beta receptor signaling pathway;GO:0030162|regulation of proteolysis;GO:0046879|hormone secretion	NA	NA	K08023|latent transforming growth factor beta binding protein 2/3/4	NA	NA	latent transforming growth factor beta binding protein 4	down
Trp63	-6.16306	1.81e-08	9.34e-08	1	0	1	52	36	62	ENSMUSG00000022510	22061	16	25683763	25892102	+	GO:0000122|negative regulation of transcription by RNA polymerase II;GO:0001302|replicative cell aging;GO:0001501|skeletal system development;GO:0001736|establishment of planar polarity;GO:0001738|morphogenesis of a polarized epithelium;GO:0001942|hair fo	NA	NA	K10149|tumor protein p63	mmu05206	MicroRNAs in cancer	transformation related protein 63	down
Slc2a10	-2.48003	5.13e-27	7.64e-26	39	28	32	227	177	180	ENSMUSG00000027661	170441	2	165503787	165519917	+	GO:0008643|carbohydrate transport;GO:0055085|transmembrane transport;GO:1902600|proton transmembrane transport;GO:1904659|glucose transmembrane transport	NA	NA	K08147|MFS transporter, SP family, solute carrier family 2 (facilitated glucose transporter), member 10	NA	NA	solute carrier family 2 (facilitated glucose transporter), member 10	down
Fkbp11	-2.43459	4.74e-54	1.71e-52	79	80	64	450	448	375	ENSMUSG00000003355	66120	15	98724366	98728198	-	GO:0000413|protein peptidyl-prolyl isomerization	NA	NA	K09576|FK506-binding protein 11 [EC:5.2.1.8]	NA	NA	FK506 binding protein 11	down
Fkbp10	-2.54897	5.68e-250	2.49e-247	384	357	372	2478	2181	2210	ENSMUSG00000001555	14230	11	100415697	100424824	+	GO:0000413|protein peptidyl-prolyl isomerization;GO:0018208|peptidyl-proline modification	NA	NA	K09575|FK506-binding protein 9/10 [EC:5.2.1.8]	NA	NA	FK506 binding protein 10	down
Aoc3	-2.47663	2.91e-16	2.56e-15	14	23	21	136	115	92	ENSMUSG00000019326	11754	11	101330605	101341938	+	GO:0002523|leukocyte migration involved in inflammatory response;GO:0002675|positive regulation of acute inflammatory response;GO:0002687|positive regulation of leukocyte migration;GO:0007155|cell adhesion;GO:0008217|regulation of blood pressure;GO:000930	NA	NA	K00276|primary-amine oxidase [EC:1.4.3.21]	mmu00260|mmu00350|mmu00360|mmu00410|mmu01100	Glycine, serine and threonine metabolism|Tyrosine metabolism|Phenylalanine metabolism|beta-Alanine metabolism|Metabolic pathways	amine oxidase, copper containing 3	down
Ptn	-3.61138	0	0	278	265	283	3984	3345	3336	ENSMUSG00000029838	19242	6	36714929	36810220	-	GO:0001503|ossification;GO:0001889|liver development;GO:0007420|brain development;GO:0007507|heart development;GO:0007612|learning;GO:0008284|positive regulation of cell population proliferation;GO:0008360|regulation of cell shape;GO:0010469|regulation of	NA	NA	K16642|pleiotrophin	NA	NA	pleiotrophin	down
Aox1	3.48139	1.6e-61	6.84e-60	381	330	310	43	35	19	ENSMUSG00000063558	11761	1	58029931	58106413	+	GO:0017144|drug metabolic process;GO:0022900|electron transport chain;GO:0055114|oxidation-reduction process	NA	NA	K00157|aldehyde oxidase [EC:1.2.3.1]	mmu00280|mmu00350|mmu00380|mmu00750|mmu00760|mmu00830|mmu00982|mmu01100|mmu04630	Valine, leucine and isoleucine degradation|Tyrosine metabolism|Tryptophan metabolism|Vitamin B6 metabolism|Nicotinate and nicotinamide metabolism|Retinol metabolism|Drug metabolism - cytochrome P450|Metabolic pathways|Jak-STAT signaling pathway	aldehyde oxidase 1	up
Gabrr2	4.96257	2.23e-05	8.41e-05	18	23	18	1	0	1	ENSMUSG00000023267	14409	4	33062999	33095865	+	GO:0006811|ion transport;GO:0006821|chloride transport;GO:0007214|gamma-aminobutyric acid signaling pathway;GO:0007601|visual perception;GO:0034220|ion transmembrane transport;GO:0060078|regulation of postsynaptic membrane potential;GO:1902476|chloride tr	NA	NA	K05190|gamma-aminobutyric acid receptor subunit rho	mmu04080|mmu04723|mmu04727|mmu05032|mmu05033	Neuroactive ligand-receptor interaction|Retrograde endocannabinoid signaling|GABAergic synapse|Morphine addiction|Nicotine addiction	gamma-aminobutyric acid (GABA) C receptor, subunit rho 2	up
Dhrs3	2.88529	0.000141522	0.000480742	14	22	20	2	4	2	ENSMUSG00000066026	20148	4	144892827	144928209	+	GO:0001523|retinoid metabolic process;GO:0003151|outflow tract morphogenesis;GO:0030278|regulation of ossification;GO:0042572|retinol metabolic process;GO:0048387|negative regulation of retinoic acid receptor signaling pathway;GO:0055114|oxidation-reducti	NA	NA	K11146|short-chain dehydrogenase/reductase 3 [EC:1.1.1.300]	mmu00830|mmu01100	Retinol metabolism|Metabolic pathways	dehydrogenase/reductase (SDR family) member 3	up
Hivep3	-2.45605	2.57e-172	6.05e-170	289	255	307	1882	1622	1439	ENSMUSG00000028634	16656	4	119733784	120138045	+	GO:0035914|skeletal muscle cell differentiation;GO:0045893|positive regulation of transcription, DNA-templated	NA	NA	K09239|human immunodeficiency virus type I enhancer-binding protein	NA	NA	human immunodeficiency virus type I enhancer binding protein 3	down
Apob	-4.84595	5.45e-07	2.45e-06	2	0	1	23	36	31	ENSMUSG00000020609	238055	12	7977648	8016835	+	GO:0001701|in utero embryonic development;GO:0006629|lipid metabolic process;GO:0006642|triglyceride mobilization;GO:0006869|lipid transport;GO:0007283|spermatogenesis;GO:0007399|nervous system development;GO:0008202|steroid metabolic process;GO:0008203|c	NA	NA	K14462|apolipoprotein B	mmu04975|mmu04977|mmu04979	Fat digestion and absorption|Vitamin digestion and absorption|Cholesterol metabolism	apolipoprotein B	down
A530020G20Rik	-2.71135	0.000208337	0.000691756	1	4	4	29	17	17	ENSMUSG00000097124	NA	3	121531619	121536206	+	NA	NA	NA	NA	NA	NA	RIKEN cDNA A530020G20 gene	down
AC133868.2	-2.39973	2.02e-05	7.66e-05	9	4	4	28	36	30	ENSMUSG00000116311	NA	15	100105234	100108161	-	NA	NA	NA	NA	NA	NA	RIKEN cDNA 4930478M13 gene	down
Fam169b	-4.6233	2.66e-06	1.12e-05	1	1	1	18	31	28	ENSMUSG00000074071	434197	7	68273839	68363092	+	GO:0008150|biological_process	NA	NA	NA|(RefSeq) family with sequence similarity 169, member B	NA	NA	family with sequence similarity 169, member B	down
Tubb2b	-2.6798	1.7e-06	7.31e-06	9	5	2	36	42	30	ENSMUSG00000045136	73710	13	34126748	34130466	-	GO:0001764|neuron migration;GO:0007010|cytoskeleton organization;GO:0007017|microtubule-based process;GO:0007399|nervous system development;GO:1902669|positive regulation of axon guidance	NA	NA	K07375|tubulin beta	mmu04145|mmu04540	Phagosome|Gap junction	tubulin, beta 2B class IIB	down
Aqp5	-3.71715	5.34e-57	2.01e-55	18	39	24	345	357	414	ENSMUSG00000044217	11830	15	99590782	99594829	+	GO:0006833|water transport;GO:0015670|carbon dioxide transport;GO:0030157|pancreatic juice secretion;GO:0042476|odontogenesis;GO:0046541|saliva secretion;GO:0048593|camera-type eye morphogenesis;GO:0055085|transmembrane transport	NA	NA	K09867|aquaporin-5	mmu04970	Salivary secretion	aquaporin 5	down
Aqp1	-2.21984	2.58e-137	4.08e-135	308	338	395	1831	1654	1632	ENSMUSG00000004655	11826	6	55336432	55348555	+	GO:0003094|glomerular filtration;GO:0003097|renal water transport;GO:0006813|potassium ion transport;GO:0006833|water transport;GO:0006884|cell volume homeostasis;GO:0006972|hyperosmotic response;GO:0009725|response to hormone;GO:0010592|positive regulati	NA	NA	K09864|aquaporin-1	mmu04924|mmu04964|mmu04976	Renin secretion|Proximal tubule bicarbonate reclamation|Bile secretion	aquaporin 1	down
AW112010	5.58385	3.12e-05	0.000115689	20	16	13	0	1	0	ENSMUSG00000075010	107350	19	11047617	11050566	-	NA	NA	NA	NA|(RefSeq) expressed sequence AW112010	NA	NA	expressed sequence AW112010	up
Rsad2	5.23579	6.17e-13	4.46e-12	57	59	62	3	0	2	ENSMUSG00000020641	58185	12	26442746	26456452	-	GO:0001503|ossification;GO:0002376|immune system process;GO:0009615|response to virus;GO:0030278|regulation of ossification;GO:0034157|positive regulation of toll-like receptor 7 signaling pathway;GO:0034165|positive regulation of toll-like receptor 9 sig	NA	NA	K15045|radical S-adenosyl methionine domain-containing protein 2	mmu05164	Influenza A	radical S-adenosyl methionine domain containing 2	up
4930429H19Rik	-4.98597	0.00244961	0.00680868	0	0	0	2	9	7	ENSMUSG00000108530	100505025	7	73310380	73315193	+	NA	NA	NA	NA|(RefSeq) RIKEN cDNA 4930429H19 gene	NA	NA	RIKEN cDNA 4930429H19 gene	down
Selp	5.52376	2.76e-16	2.43e-15	111	52	98	4	0	2	ENSMUSG00000026580	20344	1	164115264	164150026	+	GO:0002687|positive regulation of leukocyte migration;GO:0002691|regulation of cellular extravasation;GO:0006954|inflammatory response;GO:0007155|cell adhesion;GO:0007157|heterophilic cell-cell adhesion via plasma membrane cell adhesion molecules;GO:00071	NA	NA	K06496|selectin, platele	mmu04514|mmu05144|mmu05150	Cell adhesion molecules (CAMs)|Malaria|Staphylococcus aureus infection	selectin, platelet	up
Pcdh17	2.53929	0.00139437	0.00405739	18	13	13	3	3	2	ENSMUSG00000035566	219228	14	84443563	84539002	+	GO:0007155|cell adhesion;GO:0007156|homophilic cell adhesion via plasma membrane adhesion molecules;GO:0030534|adult behavior;GO:0050805|negative regulation of synaptic transmission;GO:1904071|presynaptic active zone assembly;GO:2000807|regulation of syna	NA	NA	K16499|protocadherin delta 2	NA	NA	protocadherin 17	up
Pcdh18	-2.29535	5.93e-203	1.79e-200	447	449	516	2756	2463	2119	ENSMUSG00000037892	73173	3	49743296	49757325	-	GO:0007155|cell adhesion;GO:0007156|homophilic cell adhesion via plasma membrane adhesion molecules;GO:0007399|nervous system development;GO:0007420|brain development;GO:0016339|calcium-dependent cell-cell adhesion via plasma membrane cell adhesion molecu	NA	NA	K16499|protocadherin delta 2	NA	NA	protocadherin 18	down
Sds	4.93881	2.63e-05	9.81e-05	16	24	18	1	0	1	ENSMUSG00000029597	231691	5	120476526	120483932	+	GO:0006094|gluconeogenesis;GO:0006520|cellular amino acid metabolic process;GO:0006565|L-serine catabolic process;GO:0042866|pyruvate biosynthetic process	NA	NA	K17989|L-serine/L-threonine ammonia-lyase [EC:4.3.1.17 4.3.1.19]	mmu00260|mmu00270|mmu00290|mmu01100|mmu01200|mmu01230	Glycine, serine and threonine metabolism|Cysteine and methionine metabolism|Valine, leucine and isoleucine biosynthesis|Metabolic pathways|Carbon metabolism|Biosynthesis of amino acids	serine dehydratase	up
Areg	3.64407	2.99e-05	0.000110907	16	19	24	1	4	0	ENSMUSG00000029378	11839	5	91139599	91148432	+	GO:0007173|epidermal growth factor receptor signaling pathway;GO:0007186|G protein-coupled receptor signaling pathway;GO:0008284|positive regulation of cell population proliferation;GO:0010469|regulation of signaling receptor activity;GO:0014009|glial cel	NA	NA	K09782|amphiregulin	mmu04010|mmu04012|mmu04151|mmu04390|mmu05210	MAPK signaling pathway|ErbB signaling pathway|PI3K-Akt signaling pathway|Hippo signaling pathway|Colorectal cancer	amphiregulin	up
Serpinf1	-2.50482	0	0	1209	1377	1362	8594	7787	7292	ENSMUSG00000000753	20317	11	75409769	75422701	-	GO:0001822|kidney development;GO:0007568|aging;GO:0007614|short-term memory;GO:0010447|response to acidic pH;GO:0010596|negative regulation of endothelial cell migration;GO:0010629|negative regulation of gene expression;GO:0010976|positive regulation of n	NA	NA	K19614|pigment epithelium-derived factor	mmu04310	Wnt signaling pathway	serine (or cysteine) peptidase inhibitor, clade F, member 1	down
Serpini1	3.27236	1.05e-19	1.12e-18	82	104	125	10	15	9	ENSMUSG00000027834	20713	3	75557547	75643495	+	GO:0010466|negative regulation of peptidase activity;GO:0010976|positive regulation of neuron projection development;GO:0030155|regulation of cell adhesion	NA	NA	NA|(RefSeq) serine (or cysteine) peptidase inhibitor, clade I, member 1	NA	NA	serine (or cysteine) peptidase inhibitor, clade I, member 1	up
Serpinb8	2.14252	3.34e-47	1.02e-45	427	398	393	96	111	84	ENSMUSG00000026315	20725	1	107590006	107610484	+	GO:0010466|negative regulation of peptidase activity;GO:0010951|negative regulation of endopeptidase activity;GO:0090136|epithelial cell-cell adhesion	NA	NA	K13965|serpin B8	NA	NA	serine (or cysteine) peptidase inhibitor, clade B, member 8	up
Serpinc1	2.43026	0.000674833	0.00207372	27	17	17	7	0	5	ENSMUSG00000026715	11905	1	160978585	161005863	+	GO:0002438|acute inflammatory response to antigenic stimulus;GO:0007584|response to nutrient;GO:0007595|lactation;GO:0007596|blood coagulation;GO:0007599|hemostasis;GO:0010466|negative regulation of peptidase activity;GO:0010951|negative regulation of end	NA	NA	K03911|antithrombin III	mmu04610	Complement and coagulation cascades	serine (or cysteine) peptidase inhibitor, clade C (antithrombin), member 1	up
Tnc	-2.35978	3.05e-211	9.82e-209	581	580	615	3873	3136	2672	ENSMUSG00000028364	21923	4	63959785	64047015	-	GO:0007155|cell adhesion;GO:0007162|negative regulation of cell adhesion;GO:0007528|neuromuscular junction development;GO:0008284|positive regulation of cell population proliferation;GO:0009611|response to wounding;GO:0009612|response to mechanical stimul	NA	NA	K06252|tenascin	mmu04151|mmu04510|mmu04512|mmu05165|mmu05206	PI3K-Akt signaling pathway|Focal adhesion|ECM-receptor interaction|Human papillomavirus infection|MicroRNAs in cancer	tenascin C	down
Tnr	-4.21543	1.04e-17	1e-16	4	4	5	109	80	68	ENSMUSG00000015829	21960	1	159523769	159931729	+	GO:0007155|cell adhesion;GO:0007158|neuron cell-cell adhesion;GO:0007162|negative regulation of cell adhesion;GO:0008306|associative learning;GO:0010977|negative regulation of neuron projection development;GO:0022029|telencephalon cell migration;GO:002240	NA	NA	K06252|tenascin	mmu04151|mmu04510|mmu04512|mmu05165|mmu05206	PI3K-Akt signaling pathway|Focal adhesion|ECM-receptor interaction|Human papillomavirus infection|MicroRNAs in cancer	tenascin R	down
Tacr2	-4.16056	3.56e-06	1.47e-05	1	0	3	28	31	17	ENSMUSG00000020081	21337	10	62252438	62265990	+	GO:0007165|signal transduction;GO:0007186|G protein-coupled receptor signaling pathway;GO:0007217|tachykinin receptor signaling pathway;GO:0014057|positive regulation of acetylcholine secretion, neurotransmission;GO:0014827|intestine smooth muscle contrac	NA	NA	K04223|tachykinin receptor 2	mmu04020|mmu04080	Calcium signaling pathway|Neuroactive ligand-receptor interaction	tachykinin receptor 2	down
Gm13470	-2.18175	2.59e-06	1.09e-05	8	10	8	51	35	39	ENSMUSG00000086644	NA	2	46419535	46442710	-	NA	NA	NA	NA	NA	NA	predicted gene 13470	down
Fat3	5.69482	0.000155907	0.00052701	3	13	11	0	0	0	ENSMUSG00000074505	270120	9	15910189	16501285	-	GO:0007155|cell adhesion;GO:0007156|homophilic cell adhesion via plasma membrane adhesion molecules	NA	NA	K16506|protocadherin Fat 1/2/3	NA	NA	FAT atypical cadherin 3	up
Ostm1	2.15681	2.25e-252	1.01e-249	3095	3047	2923	811	734	606	ENSMUSG00000038280	14628	10	42583822	42702459	+	GO:0030316|osteoclast differentiation	NA	NA	NA|(RefSeq) osteopetrosis associated transmembrane protein 1	NA	NA	osteopetrosis associated transmembrane protein 1	up
Shc2	-2.88809	6.32e-09	3.37e-08	6	7	5	57	38	46	ENSMUSG00000020312	216148	10	79618051	79637918	-	GO:0000187|activation of MAPK activity;GO:0035556|intracellular signal transduction	NA	NA	K17447|SHC-transforming protein 2	mmu01521|mmu01522|mmu04012|mmu04014|mmu04062|mmu04072|mmu04370|mmu04510|mmu04650|mmu04722|mmu04910|mmu04915|mmu04917|mmu04926|mmu05034|mmu05100|mmu05214|mmu05220|mmu05224|mmu05225|mmu05226	EGFR tyrosine kinase inhibitor resistance|Endocrine resistance|ErbB signaling pathway|Ras signaling pathway|Chemokine signaling pathway|Phospholipase D signaling pathway|VEGF signaling pathway|Focal adhesion|Natural killer cell mediated cytotoxicity|Neuro	SHC (Src homology 2 domain containing) transforming protein 2	down
Unc5c	-6.20044	3.54e-44	9.86e-43	1	7	4	357	311	267	ENSMUSG00000059921	22253	3	141465216	141834924	+	GO:0006915|apoptotic process;GO:0007165|signal transduction;GO:0007275|multicellular organism development;GO:0007411|axon guidance;GO:0007420|brain development;GO:0030334|regulation of cell migration;GO:0033564|anterior/posterior axon guidance;GO:0038007|	NA	NA	K07521|netrin receptor unc-5	mmu04360	Axon guidance	unc-5 netrin receptor C	down
Tenm4	-2.79324	3.35e-192	9.1e-190	198	228	212	1700	1632	1346	ENSMUSG00000048078	23966	7	96171246	96911093	+	GO:0001702|gastrulation with mouth forming second;GO:0007165|signal transduction;GO:0007275|multicellular organism development;GO:0030154|cell differentiation;GO:0031641|regulation of myelination;GO:0031643|positive regulation of myelination;GO:0032289|ce	NA	NA	NA|(RefSeq) teneurin transmembrane protein 4	NA	NA	teneurin transmembrane protein 4	down
Gm37589	-3.9823	0.000135851	0.000463435	2	0	1	19	15	16	ENSMUSG00000104235	NA	3	60535751	60539744	+	NA	NA	NA	NA	NA	NA	predicted gene, 37589	down
Gm37565	-4.90078	4.98e-11	3.12e-10	3	0	2	70	47	42	ENSMUSG00000104045	NA	2	12697417	12706853	+	NA	NA	NA	NA	NA	NA	predicted gene, 37565	down
Gm37570	2.02996	0.0021321	0.00600748	21	14	19	6	4	4	ENSMUSG00000102559	NA	1	66765626	66768731	-	NA	NA	NA	NA	NA	NA	predicted gene, 37570	up
Gm37558	2.54242	0.00156039	0.0044991	16	16	12	4	1	3	ENSMUSG00000103094	NA	3	69119742	69122724	-	NA	NA	NA	NA	NA	NA	predicted gene, 37558	up
Fam19a5	-5.08223	0.000293296	0.000954152	1	0	0	16	17	6	ENSMUSG00000054863	106014	15	87544299	87759364	+	GO:0008150|biological_process;GO:0010469|regulation of signaling receptor activity	NA	NA	NA|(RefSeq) family with sequence similarity 19, member A5	NA	NA	family with sequence similarity 19, member A5	down
Glra4	-5.00561	0.00193443	0.00549547	0	0	0	8	8	3	ENSMUSG00000018595	14657	X	136757674	136780141	-	GO:0006811|ion transport;GO:0006821|chloride transport;GO:0034220|ion transmembrane transport;GO:0043200|response to amino acid;GO:0060079|excitatory postsynaptic potential;GO:1902476|chloride transmembrane transport	NA	NA	K05271|glycine receptor alpha-4	NA	NA	glycine receptor, alpha 4 subunit	down
Slc35g2	2.26226	9.45e-05	0.000329846	32	21	24	7	6	4	ENSMUSG00000070287	245020	9	100552188	100571090	-	GO:0008150|biological_process	NA	NA	NA|(RefSeq) solute carrier family 35, member G2	NA	NA	solute carrier family 35, member G2	up
Tgfb1i1	-2.73811	1.24e-92	1.05e-90	93	117	110	917	690	659	ENSMUSG00000030782	21804	7	128246812	128255699	+	GO:0009408|response to heat;GO:0010718|positive regulation of epithelial to mesenchymal transition;GO:0016055|Wnt signaling pathway;GO:0016331|morphogenesis of embryonic epithelium;GO:0030154|cell differentiation;GO:0030511|positive regulation of transfor	NA	NA	NA|(RefSeq) transforming growth factor beta 1 induced transcript 1	NA	NA	transforming growth factor beta 1 induced transcript 1	down
Arhgap27	2.45423	9.7e-11	5.96e-10	74	69	67	22	13	6	ENSMUSG00000034255	544817	11	103331497	103363692	-	GO:0006897|endocytosis;GO:0006898|receptor-mediated endocytosis;GO:0007165|signal transduction;GO:0043547|positive regulation of GTPase activity	NA	NA	K20636|Rho GTPase-activating protein 12/27	NA	NA	Rho GTPase activating protein 27	up
Tmem236	3.35888	7.86e-06	3.12e-05	17	25	26	2	3	2	ENSMUSG00000061531	625286	2	14174523	14221993	+	GO:0008150|biological_process	NA	NA	NA|(RefSeq) transmembrane protein 236	NA	NA	transmembrane protein 236	up
Tmem238	-2.2814	5.2e-20	5.68e-19	37	41	21	181	157	169	ENSMUSG00000030431	664968	7	4784557	4789656	-	GO:0008150|biological_process	NA	NA	NA|(RefSeq) transmembrane protein 238	NA	NA	transmembrane protein 238	down
Henmt1	2.84873	0.00137781	0.00401282	15	19	7	2	2	2	ENSMUSG00000045662	66715	3	108939873	108960774	+	GO:0001510|RNA methylation;GO:0031047|gene silencing by RNA;GO:0032259|methylation;GO:0034587|piRNA metabolic process	NA	NA	K20798|small RNA 2'-O-methyltransferase [EC:2.1.1.-]	NA	NA	HEN1 methyltransferase homolog 1 (Arabidopsis)	up
Tmem202	3.46537	0.00211017	0.0059509	14	8	10	0	1	2	ENSMUSG00000049526	73893	9	59518685	59539847	-	GO:0008150|biological_process	NA	NA	NA|(RefSeq) transmembrane protein 202	NA	NA	transmembrane protein 202	up
Vegfd	-2.1585	1.29e-184	3.32e-182	555	475	468	2639	2212	2211	ENSMUSG00000031380	14205	X	164373378	164402650	+	GO:0001525|angiogenesis;GO:0007275|multicellular organism development;GO:0008283|cell population proliferation;GO:0008284|positive regulation of cell population proliferation;GO:0009617|response to bacterium;GO:0010469|regulation of signaling receptor act	NA	NA	K05449|vascular endothelial growth factor C/D	mmu04010|mmu04014|mmu04015|mmu04151|mmu04510|mmu04926|mmu04933|mmu05200	MAPK signaling pathway|Ras signaling pathway|Rap1 signaling pathway|PI3K-Akt signaling pathway|Focal adhesion|Relaxin signaling pathway|AGE-RAGE signaling pathway in diabetic complications|Pathways in cancer	vascular endothelial growth factor D	down
Ssc5d	-2.91223	1.43e-40	3.51e-39	35	33	38	365	234	249	ENSMUSG00000035279	269855	7	4925785	4944826	+	GO:0002376|immune system process;GO:0006898|receptor-mediated endocytosis;GO:0006952|defense response;GO:0007275|multicellular organism development;GO:0042494|detection of bacterial lipoprotein;GO:0045087|innate immune response;GO:0050829|defense response	NA	NA	NA|(RefSeq) scavenger receptor cysteine rich family, 5 domains	NA	NA	scavenger receptor cysteine rich family, 5 domains	down
Aloxe3	2.45092	8.24e-11	5.08e-10	63	60	68	15	12	10	ENSMUSG00000020892	23801	11	69125896	69149115	+	GO:0006629|lipid metabolic process;GO:0006631|fatty acid metabolic process;GO:0006665|sphingolipid metabolic process;GO:0019233|sensory perception of pain;GO:0019369|arachidonic acid metabolic process;GO:0019372|lipoxygenase pathway;GO:0035357|peroxisome	NA	NA	K18684|hydroperoxy icosatetraenoate dehydratase/isomerase [EC:4.2.1.152 5.4.4.7]	NA	NA	arachidonate lipoxygenase 3	up
1700018L02Rik	-3.42726	0.000913844	0.00274609	0	2	2	31	6	10	ENSMUSG00000100075	NA	19	29046245	29048729	+	NA	NA	NA	NA	NA	NA	RIKEN cDNA 1700018L02 gene	down
Slpi	-2.38	4.18e-58	1.63e-56	87	126	98	677	506	532	ENSMUSG00000017002	20568	2	164354070	164389095	-	GO:0002376|immune system process;GO:0006508|proteolysis;GO:0006955|immune response;GO:0010466|negative regulation of peptidase activity;GO:0010951|negative regulation of endopeptidase activity;GO:0019731|antibacterial humoral response;GO:0032091|negative	NA	NA	NA|(RefSeq) secretory leukocyte peptidase inhibitor	NA	NA	secretory leukocyte peptidase inhibitor	down
Pcdha3	2.11868	6.87e-08	3.36e-07	57	52	58	19	15	7	ENSMUSG00000102312	192163	18	36946105	37187657	+	GO:0007155|cell adhesion;GO:0007156|homophilic cell adhesion via plasma membrane adhesion molecules	NA	NA	K16493|protocadherin alpha	NA	NA	protocadherin alpha 3	up
Arhgef9	-2.03866	2.06e-11	1.33e-10	32	13	28	115	100	101	ENSMUSG00000025656	236915	X	95048935	95196856	-	GO:0007264|small GTPase mediated signal transduction;GO:0035023|regulation of Rho protein signal transduction;GO:0043113|receptor clustering	NA	NA	K20686|Rho guanine nucleotide exchange factor 9	NA	NA	CDC42 guanine nucleotide exchange factor (GEF) 9	down
Fgd4	-2.07701	3.74e-22	4.5e-21	51	42	43	209	229	168	ENSMUSG00000022788	224014	16	16416917	16600549	-	GO:0007257|activation of JUN kinase activity;GO:0008360|regulation of cell shape;GO:0030032|lamellipodium assembly;GO:0030035|microspike assembly;GO:0035023|regulation of Rho protein signal transduction	NA	NA	K05723|FYVE, RhoGEF and PH domain containing 4	NA	NA	FYVE, RhoGEF and PH domain containing 4	down
Fgf7	-2.4699	5.71e-89	4.41e-87	159	114	136	921	735	739	ENSMUSG00000027208	14178	2	126034658	126091185	+	GO:0001541|ovarian follicle development;GO:0006656|phosphatidylcholine biosynthetic process;GO:0008284|positive regulation of cell population proliferation;GO:0008543|fibroblast growth factor receptor signaling pathway;GO:0008654|phospholipid biosynthetic	NA	NA	K04358|fibroblast growth factor	mmu04010|mmu04014|mmu04015|mmu04151|mmu04810|mmu05200|mmu05218|mmu05224|mmu05226	MAPK signaling pathway|Ras signaling pathway|Rap1 signaling pathway|PI3K-Akt signaling pathway|Regulation of actin cytoskeleton|Pathways in cancer|Melanoma|Breast cancer|Gastric cancer	fibroblast growth factor 7	down
Nova2	-2.10692	1.79e-05	6.8e-05	9	10	5	38	37	34	ENSMUSG00000030411	384569	7	18925888	18965319	+	GO:0000398|mRNA splicing, via spliceosome;GO:0051252|regulation of RNA metabolic process;GO:0120163|negative regulation of cold-induced thermogenesis	NA	NA	K14944|RNA-binding protein Nova	NA	NA	neuro-oncological ventral antigen 2	down
Fgl1	2.35894	0.00300648	0.00822383	14	11	24	4	0	6	ENSMUSG00000031594	234199	8	41191434	41215156	-	NA	NA	NA	NA|(RefSeq) fibrinogen-like protein 1	NA	NA	fibrinogen-like protein 1	up
Slc3a1	2.08686	0.00108664	0.00322851	19	16	25	6	6	3	ENSMUSG00000024131	20532	17	85028347	85064243	+	GO:0005975|carbohydrate metabolic process;GO:0006865|amino acid transport	NA	NA	K14210|solute carrier family 3 (neutral and basic amino acid transporter), member 1	mmu04974	Protein digestion and absorption	solute carrier family 3, member 1	up
Tnni2	-5.27864	0.000753808	0.0022952	0	0	0	13	3	7	ENSMUSG00000031097	21953	7	142441808	142444410	+	GO:0003009|skeletal muscle contraction;GO:0006937|regulation of muscle contraction;GO:0045893|positive regulation of transcription, DNA-templated	NA	NA	K12043|troponin I, fast skeletal muscle	NA	NA	troponin I, skeletal, fast 2	down
Tnnc1	-2.62549	3.08e-06	1.28e-05	6	5	4	37	34	27	ENSMUSG00000091898	21924	14	31208312	31211729	+	GO:0002086|diaphragm contraction;GO:0006937|regulation of muscle contraction;GO:0010038|response to metal ion;GO:0014883|transition between fast and slow fiber;GO:0032972|regulation of muscle filament sliding speed;GO:0043462|regulation of ATPase activity	NA	NA	K05865|troponin C, slow skeletal and cardiac muscles	mmu04020|mmu04260|mmu04261|mmu05410|mmu05414	Calcium signaling pathway|Cardiac muscle contraction|Adrenergic signaling in cardiomyocytes|Hypertrophic cardiomyopathy (HCM)|Dilated cardiomyopathy (DCM)	troponin C, cardiac/slow skeletal	down
Gm1123	3.69002	1.4e-05	5.37e-05	20	19	23	0	2	3	ENSMUSG00000044860	382097	9	99006790	99035715	-	NA	GO:0003674|molecular_function	NA	NA|(RefSeq) predicted gene 1123	NA	NA	predicted gene 1123	up
Crocc2	-3.05771	0.00018738	0.000626808	4	2	1	33	22	8	ENSMUSG00000084989	381284	1	93168725	93231072	+	GO:0008150|biological_process	NA	NA	NA|(RefSeq) ciliary rootlet coiled-coil, rootletin family member 2	NA	NA	ciliary rootlet coiled-coil, rootletin family member 2	down
Gm42782	4.71873	0.0015387	0.00444318	15	3	9	0	0	1	ENSMUSG00000105976	NA	3	96784325	96784846	+	NA	NA	NA	NA	NA	NA	predicted gene 42782	up
Ocln	3.9268	2.22e-05	8.36e-05	18	17	23	0	3	1	ENSMUSG00000021638	18260	13	100496507	100552718	-	GO:0045216|cell-cell junction organization;GO:0070673|response to interleukin-18;GO:0070830|bicellular tight junction assembly;GO:0071356|cellular response to tumor necrosis factor	NA	NA	K06088|occludin	mmu04514|mmu04530|mmu04670|mmu05160	Cell adhesion molecules (CAMs)|Tight junction|Leukocyte transendothelial migration|Hepatitis C	occludin	up
Slc5a7	-5.69567	8.77e-05	0.000307406	0	0	0	9	11	10	ENSMUSG00000023945	63993	17	54273594	54299034	-	GO:0006811|ion transport;GO:0006814|sodium ion transport;GO:0007271|synaptic transmission, cholinergic;GO:0007274|neuromuscular synaptic transmission;GO:0008292|acetylcholine biosynthetic process;GO:0015871|choline transport;GO:0042136|neurotransmitter bi	NA	NA	K14387|solute carrier family 5 (high affinity choline transporter), member 7	mmu04725|mmu05231	Cholinergic synapse|Choline metabolism in cancer	solute carrier family 5 (choline transporter), member 7	down
Glyat	5.57671	0.000201418	0.000669589	9	11	5	0	0	0	ENSMUSG00000063683	107146	19	12633308	12653911	+	GO:0006544|glycine metabolic process;GO:0009636|response to toxic substance;GO:0032787|monocarboxylic acid metabolic process;GO:1901787|benzoyl-CoA metabolic process	NA	NA	K00628|glycine N-acyltransferase / glycine N-benzoyltransferase [EC:2.3.1.13 2.3.1.71]	mmu00360	Phenylalanine metabolism	glycine-N-acyltransferase	up
Gm27240	-3.80148	5.14e-06	2.08e-05	3	2	0	29	27	18	ENSMUSG00000098843	NA	9	32709652	32711171	-	NA	NA	NA	NA	NA	NA	predicted gene 27240	down
Armc4	5.02061	0.00217592	0.00611935	5	3	9	0	0	0	ENSMUSG00000061802	NA	18	7088233	7297901	-	GO:0003341|cilium movement;GO:0003356|regulation of cilium beat frequency;GO:0007368|determination of left/right symmetry;GO:0007507|heart development;GO:0021591|ventricular system development;GO:0030030|cell projection organization;GO:0036158|outer dynei	NA	NA	NA|(RefSeq) armadillo repeat containing 4	NA	NA	armadillo repeat containing 4	up
Tex14	4.7742	1.71e-08	8.83e-08	34	37	34	0	0	4	ENSMUSG00000010342	83560	11	87405065	87555823	+	GO:0006468|protein phosphorylation;GO:0007049|cell cycle;GO:0007094|mitotic spindle assembly checkpoint;GO:0007140|male meiotic nuclear division;GO:0008608|attachment of spindle microtubules to kinetochore;GO:0032091|negative regulation of protein binding	NA	NA	K17540|inactive serine/threonine-protein kinase TEX14	NA	NA	testis expressed gene 14	up
Crispld2	-3.62663	3.51e-07	1.61e-06	3	2	2	29	35	27	ENSMUSG00000031825	78892	8	119992438	120052793	+	GO:0030198|extracellular matrix organization;GO:0030324|lung development;GO:0060325|face morphogenesis	NA	NA	NA|(RefSeq) cysteine-rich secretory protein LCCL domain containing 2	NA	NA	cysteine-rich secretory protein LCCL domain containing 2	down
Slc6a2	-6.21789	1.2e-08	6.24e-08	0	0	2	56	66	36	ENSMUSG00000055368	20538	8	92960079	93001667	+	GO:0006836|neurotransmitter transport;GO:0015844|monoamine transport;GO:0015874|norepinephrine transport;GO:0042493|response to drug;GO:0048265|response to pain;GO:0051620|norepinephrine uptake;GO:0055085|transmembrane transport	NA	NA	K05035|solute carrier family 6 (neurotransmitter transporter, noradrenalin) member 2	NA	NA	solute carrier family 6 (neurotransmitter transporter, noradrenalin), member 2	down
Slc6a7	-5.61679	0.000136109	0.000464233	0	0	0	14	8	7	ENSMUSG00000052026	240332	18	60995381	61014199	-	GO:0006836|neurotransmitter transport;GO:0006865|amino acid transport;GO:0035524|proline transmembrane transport	NA	NA	K05038|solute carrier family 6 (neurotransmitter transporter, amino acid) member 5/7/9/14	NA	NA	solute carrier family 6 (neurotransmitter transporter, L-proline), member 7	down
Wfdc18	-4.08064	8e-05	0.000282053	1	1	1	20	23	11	ENSMUSG00000000983	14038	11	83709015	83711348	+	GO:0010466|negative regulation of peptidase activity	NA	NA	NA|(RefSeq) WAP four-disulfide core domain 18	NA	NA	WAP four-disulfide core domain 18	down
Wfdc21	-4.4603	0.00288713	0.00792658	1	0	0	7	13	5	ENSMUSG00000051748	66107	11	83746940	83752642	+	GO:0010466|negative regulation of peptidase activity;GO:0032496|response to lipopolysaccharide;GO:0034612|response to tumor necrosis factor;GO:0043085|positive regulation of catalytic activity;GO:0050872|white fat cell differentiation	NA	NA	NA|(RefSeq) WAP four-disulfide core domain 21	NA	NA	WAP four-disulfide core domain 21	down
Gm37174	2.07374	0.000407897	0.0012983	27	20	28	8	9	2	ENSMUSG00000104253	NA	1	121328092	121331149	+	NA	NA	NA	NA	NA	NA	predicted gene, 37174	up
Wisp2	-2.55342	2.21e-07	1.03e-06	6	7	7	43	45	36	ENSMUSG00000027656	22403	2	163820861	163833146	+	GO:0001558|regulation of cell growth	NA	NA	NA|(RefSeq) WNT1 inducible signaling pathway protein 2	NA	NA	WNT1 inducible signaling pathway protein 2	down
Srms	4.93376	0.00261242	0.00722477	5	6	5	0	0	0	ENSMUSG00000027579	20811	2	181205562	181213185	-	GO:0006468|protein phosphorylation;GO:0016310|phosphorylation;GO:0018108|peptidyl-tyrosine phosphorylation;GO:0038083|peptidyl-tyrosine autophosphorylation	NA	NA	K08895|tyrosine-protein kinase Srms [EC:2.7.10.2]	NA	NA	src-related kinase lacking C-terminal regulatory tyrosine and N-terminal myristylation sites	up
Gm37274	2.4819	0.00238323	0.00664426	17	12	14	2	1	5	ENSMUSG00000103285	NA	2	156084610	156086291	-	NA	NA	NA	NA	NA	NA	predicted gene, 37274	up
Fam135b	-5.10802	3.26e-10	1.93e-09	1	1	2	57	44	45	ENSMUSG00000036800	70363	15	71431609	71727838	-	NA	NA	GO:0005575|cellular_component	NA|(RefSeq) family with sequence similarity 135, member B	NA	NA	family with sequence similarity 135, member B	down
Gm13372	-2.19617	4.8e-09	2.59e-08	15	14	12	88	58	54	ENSMUSG00000086560	NA	2	28025417	28030437	-	NA	NA	NA	NA	NA	NA	predicted gene 13372	down
Gm13387	4.93407	0.00343362	0.00929752	4	2	10	0	0	0	ENSMUSG00000087028	329358	2	25122603	25145396	-	NA	NA	NA	NA|(RefSeq) predicted gene 13387	NA	NA	predicted gene 13387	up
Fam131b	-2.45786	9.22e-85	6.59e-83	123	112	104	725	653	590	ENSMUSG00000029861	76156	6	42315312	42324643	-	NA	NA	GO:0005654|nucleoplasm;GO:0005829|cytosol	NA|(RefSeq) family with sequence similarity 131, member B	NA	NA	family with sequence similarity 131, member B	down
Gm37310	-6.27756	3.74e-23	4.73e-22	2	1	3	215	168	114	ENSMUSG00000103047	NA	15	8652106	8655073	-	NA	NA	NA	NA	NA	NA	predicted gene, 37310	down
Sash3	5.38182	0.000696253	0.0021341	15	4	3	0	0	0	ENSMUSG00000031101	74131	X	48146436	48161565	+	GO:0002639|positive regulation of immunoglobulin production;GO:0002726|positive regulation of T cell cytokine production;GO:0002821|positive regulation of adaptive immune response;GO:0030890|positive regulation of B cell proliferation;GO:0032729|positive	NA	NA	NA|(RefSeq) SAM and SH3 domain containing 3	NA	NA	SAM and SH3 domain containing 3	up
Fmod	-5.75917	7.86e-05	0.000277363	0	0	0	13	14	5	ENSMUSG00000041559	14264	1	134037254	134048277	+	GO:0030199|collagen fibril organization	NA	NA	K08121|fibromodulin	NA	NA	fibromodulin	down
Crct1	3.8682	0.000362874	0.00116305	15	9	17	2	1	0	ENSMUSG00000027913	74175	3	93014205	93015687	-	NA	NA	NA	NA|(RefSeq) cysteine-rich C-terminal 1	NA	NA	cysteine-rich C-terminal 1	up
Slc1a3	-4.9012	0	0	97	108	100	3770	2989	2894	ENSMUSG00000005360	20512	15	8634124	8710764	-	GO:0006536|glutamate metabolic process;GO:0006537|glutamate biosynthetic process;GO:0006865|amino acid transport;GO:0007605|sensory perception of sound;GO:0009416|response to light stimulus;GO:0009449|gamma-aminobutyric acid biosynthetic process;GO:000961	NA	NA	K05614|solute carrier family 1 (glial high affinity glutamate transporter), member 3	mmu04724	Glutamatergic synapse	solute carrier family 1 (glial high affinity glutamate transporter), member 3	down
4933421A08Rik	-6.33793	3.8e-06	1.56e-05	0	0	0	25	12	11	ENSMUSG00000086443	NA	4	122961309	122963475	+	NA	NA	NA	NA	NA	NA	RIKEN cDNA 4933421A08 gene	down
Gm5857	2.20506	0.00172182	0.00493138	18	12	22	6	3	3	ENSMUSG00000106416	NA	3	144427180	144427672	-	NA	NA	NA	NA	NA	NA	predicted gene 5857	up
Spink5	5.39125	0.000417174	0.00132608	8	6	8	0	0	0	ENSMUSG00000055561	72432	18	43963235	44022501	+	GO:0002787|negative regulation of antibacterial peptide production;GO:0009913|epidermal cell differentiation;GO:0030155|regulation of cell adhesion;GO:0045861|negative regulation of proteolysis;GO:1900004|negative regulation of serine-type endopeptidase a	NA	NA	NA|(RefSeq) serine peptidase inhibitor, Kazal type 5	NA	NA	serine peptidase inhibitor, Kazal type 5	up
Robo3	2.70017	0.000267281	0.000874385	17	24	19	7	3	0	ENSMUSG00000032128	19649	9	37415669	37433246	-	GO:0007411|axon guidance;GO:0016199|axon midline choice point recognition;GO:0035385|Roundabout signaling pathway;GO:0061642|chemoattraction of axon;GO:0071679|commissural neuron axon guidance	NA	NA	K06755|roundabout, axon guidance receptor 3	mmu04360	Axon guidance	roundabout guidance receptor 3	up
Fosb	3.75697	4.5e-129	6.48e-127	642	689	656	50	52	53	ENSMUSG00000003545	14282	7	19302696	19310051	-	GO:0006355|regulation of transcription, DNA-templated;GO:0006357|regulation of transcription by RNA polymerase II;GO:0006366|transcription by RNA polymerase II;GO:0007565|female pregnancy;GO:0009612|response to mechanical stimulus;GO:0032570|response to p	NA	NA	K09029|protein FosB	mmu04380|mmu04657|mmu05030|mmu05031|mmu05034	Osteoclast differentiation|IL-17 signaling pathway|Cocaine addiction|Amphetamine addiction|Alcoholism	FBJ osteosarcoma oncogene B	up
Bcl3	-3.19156	7.6e-14	5.85e-13	4	7	14	91	96	56	ENSMUSG00000053175	12051	7	19808462	19822770	-	GO:0000060|obsolete protein import into nucleus, translocation;GO:0002268|follicular dendritic cell differentiation;GO:0002315|marginal zone B cell differentiation;GO:0002455|humoral immune response mediated by circulating immunoglobulin;GO:0002467|germin	NA	NA	K09258|B-cell CLL/lymphoma protein 3	mmu04625|mmu04668	C-type lectin receptor signaling pathway|TNF signaling pathway	B cell leukemia/lymphoma 3	down
Gm44750	2.78008	3.05e-05	0.000112938	20	27	30	5	7	0	ENSMUSG00000108750	NA	6	83870065	83872287	+	NA	NA	NA	NA	NA	NA	predicted gene 44750	up
Gm44758	-2.94214	3.15e-05	0.00011643	3	2	4	32	28	14	ENSMUSG00000108678	NA	7	73404350	73406417	+	NA	NA	NA	NA	NA	NA	predicted gene 44758	down
Oit3	4.75533	2.88e-27	4.35e-26	125	141	116	8	4	3	ENSMUSG00000009654	18302	10	59422958	59441778	-	GO:1903118|urate homeostasis	NA	NA	NA|(RefSeq) oncoprotein induced transcript 3	NA	NA	oncoprotein induced transcript 3	up
Aldh3b1	2.83168	1.21e-43	3.3e-42	273	277	261	56	35	30	ENSMUSG00000024885	67689	19	3913493	3929761	-	GO:0006068|ethanol catabolic process;GO:0006081|cellular aldehyde metabolic process;GO:0034599|cellular response to oxidative stress;GO:0046185|aldehyde catabolic process;GO:0055114|oxidation-reduction process	NA	NA	K00129|aldehyde dehydrogenase (NAD(P)+) [EC:1.2.1.5]	mmu00010|mmu00340|mmu00350|mmu00360|mmu00410|mmu00980|mmu00982|mmu01100|mmu05204	Glycolysis / Gluconeogenesis|Histidine metabolism|Tyrosine metabolism|Phenylalanine metabolism|beta-Alanine metabolism|Metabolism of xenobiotics by cytochrome P450|Drug metabolism - cytochrome P450|Metabolic pathways|Chemical carcinogenesis	aldehyde dehydrogenase 3 family, member B1	up
Veph1	-4.01563	6.42e-07	2.87e-06	2	1	2	34	32	20	ENSMUSG00000027831	72789	3	66053558	66296837	-	GO:0008150|biological_process	NA	NA	NA|(RefSeq) ventricular zone expressed PH domain-containing 1	NA	NA	ventricular zone expressed PH domain-containing 1	down
Mtmr11	-2.16928	6.3e-48	1.95e-46	86	87	93	489	407	371	ENSMUSG00000045934	194126	3	96162004	96171718	+	GO:0008150|biological_process	NA	NA	K18085|myotubularin-related protein 10/11/12	NA	NA	myotubularin related protein 11	down
Igsf10	-3.75974	5.98e-32	1.08e-30	14	9	13	202	189	127	ENSMUSG00000036334	242050	3	59316735	59344394	-	GO:0001503|ossification;GO:0042246|tissue regeneration;GO:2001222|regulation of neuron migration	NA	NA	NA|(RefSeq) immunoglobulin superfamily, member 10	NA	NA	immunoglobulin superfamily, member 10	down
Clec4d	5.10742	0.00156524	0.00451099	3	6	9	0	0	0	ENSMUSG00000030144	17474	6	123262111	123275265	+	GO:0002250|adaptive immune response;GO:0002292|T cell differentiation involved in immune response;GO:0002376|immune system process;GO:0030887|positive regulation of myeloid dendritic cell activation;GO:0038094|Fc-gamma receptor signaling pathway;GO:004274	NA	NA	K10058|C-type lectin domain family 4 member D	mmu04625	C-type lectin receptor signaling pathway	C-type lectin domain family 4, member d	up
Clec3b	-4.1013	2.71e-07	1.26e-06	1	2	2	38	24	29	ENSMUSG00000025784	21922	9	123150946	123157432	+	GO:0001503|ossification;GO:0030282|bone mineralization;GO:0071310|cellular response to organic substance;GO:0071560|cellular response to transforming growth factor beta stimulus	NA	NA	K17520|C-type lectin domain family 3 member B	NA	NA	C-type lectin domain family 3, member b	down
Clec2l	7.06328	5.1e-08	2.53e-07	21	25	24	0	0	0	ENSMUSG00000079598	665180	6	38663069	38680864	+	GO:0008150|biological_process	NA	NA	K22681|c-type lectin domain family 2 member L	NA	NA	C-type lectin domain family 2, member L	up
Clec2d	-3.15187	1.48e-39	3.52e-38	28	19	29	232	261	218	ENSMUSG00000030157	93694	6	129180615	129186534	+	GO:0006968|cellular defense response;GO:0042270|protection from natural killer cell mediated cytotoxicity;GO:0045671|negative regulation of osteoclast differentiation	NA	NA	NA|(RefSeq) C-type lectin domain family 2, member d	NA	NA	C-type lectin domain family 2, member d	down
Kcna4	-2.20426	6.35e-06	2.55e-05	6	8	9	41	36	35	ENSMUSG00000042604	16492	2	107290639	107298502	+	GO:0006811|ion transport;GO:0006813|potassium ion transport;GO:0034765|regulation of ion transmembrane transport;GO:0051260|protein homooligomerization;GO:0055085|transmembrane transport;GO:0071805|potassium ion transmembrane transport	NA	NA	K04877|potassium voltage-gated channel Shaker-related subfamily A member 4	mmu04927|mmu04934	Cortisol synthesis and secretion|Cushing syndrome	potassium voltage-gated channel, shaker-related subfamily, member 4	down
Soat2	-2.05571	6.01e-14	4.66e-13	35	33	18	141	127	110	ENSMUSG00000023045	223920	15	102150526	102163469	+	GO:0006629|lipid metabolic process;GO:0008202|steroid metabolic process;GO:0008203|cholesterol metabolic process;GO:0033344|cholesterol efflux;GO:0034379|very-low-density lipoprotein particle assembly;GO:0034435|cholesterol esterification;GO:0042632|chole	NA	NA	K00637|sterol O-acyltransferase [EC:2.3.1.26]	mmu00100|mmu04979	Steroid biosynthesis|Cholesterol metabolism	sterol O-acyltransferase 2	down
Gm20632	2.20255	7.61e-09	4.04e-08	73	63	50	21	12	10	ENSMUSG00000093577	NA	3	96239393	96241819	+	NA	NA	NA	NA	NA	NA	predicted gene 20632	up
Gm20633	2.33484	2.98e-13	2.19e-12	84	85	95	15	21	19	ENSMUSG00000093553	NA	3	96243550	96246380	-	NA	NA	NA	NA	NA	NA	predicted gene 20633	up
Olr1	5.45314	0.000338979	0.00109136	10	5	8	0	0	0	ENSMUSG00000030162	108078	6	129485244	129507165	-	GO:0002376|immune system process;GO:0006898|receptor-mediated endocytosis;GO:0006954|inflammatory response;GO:0007155|cell adhesion;GO:0007159|leukocyte cell-cell adhesion;GO:0008219|cell death;GO:0010629|negative regulation of gene expression;GO:0042157|	NA	NA	K08763|oxidised low-density lipoprotein receptor 1	mmu03320|mmu04145	PPAR signaling pathway|Phagosome	oxidized low density lipoprotein (lectin-like) receptor 1	up
Gm19619	5.10258	0.00138441	0.00403084	6	5	7	0	0	0	ENSMUSG00000107198	100503265	5	91257571	91283421	-	NA	NA	NA	NA|(RefSeq) predicted gene, 19619	NA	NA	predicted gene, 19619	up
Gm30025	-2.35573	7.23e-05	0.00025618	4	11	2	42	27	24	ENSMUSG00000112278	NA	12	80435209	80435936	+	NA	NA	NA	NA	NA	NA	predicted gene, 30025	down
Gm29036	2.26873	0.00258711	0.00716196	19	15	12	2	5	3	ENSMUSG00000101587	NA	5	45768867	45769743	-	NA	NA	NA	NA	NA	NA	predicted gene 29036	up
Hdac9	-2.79731	1.35e-10	8.17e-10	6	9	9	59	64	53	ENSMUSG00000004698	79221	12	34047580	34917095	-	GO:0000122|negative regulation of transcription by RNA polymerase II;GO:0006325|chromatin organization;GO:0016575|histone deacetylation;GO:0032869|cellular response to insulin stimulus;GO:0034983|peptidyl-lysine deacetylation;GO:0045892|negative regulatio	NA	NA	K11409|histone deacetylase 9 [EC:3.5.1.98]	mmu05034|mmu05165|mmu05203	Alcoholism|Human papillomavirus infection|Viral carcinogenesis	histone deacetylase 9	down
Gm44645	-3.18906	0.000111848	0.000386055	2	3	1	15	19	23	ENSMUSG00000108601	NA	7	73422250	73423902	+	NA	NA	NA	NA	NA	NA	predicted gene 44645	down
Treml4	5.32785	0.000573407	0.00178133	5	7	9	0	0	0	ENSMUSG00000051682	224840	17	48264295	48275360	+	GO:0002230|positive regulation of defense response to virus by host;GO:0002376|immune system process;GO:0002457|T cell antigen processing and presentation;GO:0006911|phagocytosis, engulfment;GO:0008104|protein localization;GO:0034157|positive regulation o	NA	NA	NA|(RefSeq) triggering receptor expressed on myeloid cells-like 4	NA	NA	triggering receptor expressed on myeloid cells-like 4	up
Synm	-2.23506	3.13e-09	1.71e-08	16	8	19	87	56	71	ENSMUSG00000030554	233335	7	67730160	67759742	-	GO:0031443|fast-twitch skeletal muscle fiber contraction;GO:0045104|intermediate filament cytoskeleton organization	NA	NA	K10376|desmuslin	NA	NA	synemin, intermediate filament protein	down
Podnl1	-2.75194	1.54e-50	5.09e-49	55	43	49	412	351	287	ENSMUSG00000012889	244550	8	84125989	84132527	+	NA	NA	GO:0005576|extracellular region;GO:0062023|collagen-containing extracellular matrix	NA|(RefSeq) podocan-like 1	NA	NA	podocan-like 1	down
Postn	-3.34264	5.14e-42	1.34e-40	24	21	26	333	229	205	ENSMUSG00000027750	50706	3	54361109	54391037	+	GO:0001666|response to hypoxia;GO:0001953|negative regulation of cell-matrix adhesion;GO:0003073|regulation of systemic arterial blood pressure;GO:0007155|cell adhesion;GO:0008593|regulation of Notch signaling pathway;GO:0009612|response to mechanical sti	NA	NA	NA|(RefSeq) periostin, osteoblast specific factor	NA	NA	periostin, osteoblast specific factor	down
Syt1	4.93038	0.00285838	0.00785545	7	6	3	0	0	0	ENSMUSG00000035864	20979	10	108497650	109010982	-	GO:0005513|detection of calcium ion;GO:0007269|neurotransmitter secretion;GO:0007420|brain development;GO:0014059|regulation of dopamine secretion;GO:0016079|synaptic vesicle exocytosis;GO:0017158|regulation of calcium ion-dependent exocytosis;GO:0030154|	NA	NA	K15290|synaptotagmin-1	mmu04721	Synaptic vesicle cycle	synaptotagmin I	up
S1pr3	-4.58442	3.15e-56	1.17e-54	12	12	12	366	256	292	ENSMUSG00000067586	13610	13	51408639	51422797	+	GO:0001816|cytokine production;GO:0003376|sphingosine-1-phosphate receptor signaling pathway;GO:0006954|inflammatory response;GO:0007165|signal transduction;GO:0007186|G protein-coupled receptor signaling pathway;GO:0007193|adenylate cyclase-inhibiting G	NA	NA	K04290|sphingosine 1-phosphate receptor 3	mmu04071|mmu04080	Sphingolipid signaling pathway|Neuroactive ligand-receptor interaction	sphingosine-1-phosphate receptor 3	down
Exoc3l2	-3.78021	1.91e-07	8.98e-07	2	3	2	31	21	48	ENSMUSG00000011263	74463	7	19463331	19496762	+	GO:0006887|exocytosis;GO:0008150|biological_process	NA	NA	K19988|exocyst complex component 3-like protein 2	NA	NA	exocyst complex component 3-like 2	down
Gm30691	-5.55848	0.000193819	0.000646441	0	0	0	8	6	13	ENSMUSG00000115328	NA	15	64627409	64633508	-	NA	NA	NA	NA	NA	NA	predicted gene, 30691	down
Klk10	-2.81429	0.00323848	0.00880973	2	1	2	10	18	9	ENSMUSG00000030693	69540	7	43781035	43785410	+	GO:0006508|proteolysis	NA	NA	K09619|kallikrein 10 [EC:3.4.21.-]	NA	NA	kallikrein related-peptidase 10	down
Igfbp4	-3.67181	2.32e-124	3.07e-122	49	56	56	741	780	644	ENSMUSG00000017493	16010	11	99041244	99054392	+	GO:0001558|regulation of cell growth;GO:0006954|inflammatory response;GO:0010906|regulation of glucose metabolic process;GO:0040008|regulation of growth;GO:0043410|positive regulation of MAPK cascade;GO:0043568|positive regulation of insulin-like growth f	NA	NA	NA|(RefSeq) insulin-like growth factor binding protein 4	NA	NA	insulin-like growth factor binding protein 4	down
Gm7609	3.83941	0.000391977	0.001253	13	19	9	0	2	1	ENSMUSG00000079457	NA	1	85199613	85213786	+	NA	NA	NA	NA	NA	NA	predicted pseudogene 7609	up
Gm7582	4.0803	0.00134108	0.00391175	9	12	11	1	0	1	ENSMUSG00000061852	NA	1	85027954	85041958	-	NA	NA	NA	NA	NA	NA	predicted gene 7582	up
Gm7592	5.17901	0.00117118	0.00345745	8	8	3	0	0	0	ENSMUSG00000090186	NA	1	85526690	85550577	+	NA	NA	NA	NA	NA	NA	predicted gene 7592	up
Opn5	5.51882	0.000240543	0.000792151	7	7	10	0	0	0	ENSMUSG00000043972	353344	17	42556783	42611313	-	GO:0007165|signal transduction;GO:0007186|G protein-coupled receptor signaling pathway;GO:0007601|visual perception;GO:0007602|phototransduction;GO:0009584|detection of visible light;GO:0018298|protein-chromophore linkage;GO:0050896|response to stimulus	NA	NA	K08385|G0-opsin	NA	NA	opsin 5	up
A530016L24Rik	2.58596	0.00119928	0.00353499	15	13	17	4	3	1	ENSMUSG00000043122	319942	12	112489448	112499927	+	NA	NA	GO:0016020|membrane;GO:0016021|integral component of membrane	NA|(RefSeq) RIKEN cDNA A530016L24 gene	NA	NA	RIKEN cDNA A530016L24 gene	up
Slurp1	-6.02009	2.12e-05	8.02e-05	0	0	0	8	12	17	ENSMUSG00000022596	57277	15	74724318	74728034	-	GO:0007626|locomotory behavior;GO:0008285|negative regulation of cell population proliferation;GO:0010469|regulation of signaling receptor activity;GO:0010839|negative regulation of keratinocyte proliferation;GO:0030336|negative regulation of cell migrati	NA	NA	NA|(RefSeq) secreted Ly6/Plaur domain containing 1	NA	NA	secreted Ly6/Plaur domain containing 1	down
Gm29460	2.93038	0.00103634	0.00309157	8	26	15	6	0	1	ENSMUSG00000099686	NA	1	98764841	98765554	+	NA	NA	NA	NA	NA	NA	predicted gene 29460	up
Brsk1	-3.60144	8.4e-07	3.72e-06	0	4	3	27	27	35	ENSMUSG00000035390	381979	7	4690604	4715997	+	GO:0000086|G2/M transition of mitotic cell cycle;GO:0006468|protein phosphorylation;GO:0006974|cellular response to DNA damage stimulus;GO:0007049|cell cycle;GO:0007095|mitotic G2 DNA damage checkpoint;GO:0007269|neurotransmitter secretion;GO:0007399|nerv	NA	NA	K08796|BR serine/threonine kinase [EC:2.7.11.1]	NA	NA	BR serine/threonine kinase 1	down
9530034E10Rik	-6.94024	1.35e-07	6.45e-07	0	0	0	15	23	32	ENSMUSG00000086554	NA	4	117975036	117993972	+	NA	NA	NA	NA	NA	NA	RIKEN cDNA 9530034E10 gene	down
Pgam2	3.78712	2.88e-26	4.17e-25	130	116	119	11	12	5	ENSMUSG00000020475	56012	11	5801640	5803733	-	GO:0006094|gluconeogenesis;GO:0006096|glycolytic process;GO:0006941|striated muscle contraction;GO:0007219|Notch signaling pathway;GO:0007283|spermatogenesis;GO:0010035|response to inorganic substance;GO:0046689|response to mercury ion	NA	NA	K01834|2,3-bisphosphoglycerate-dependent phosphoglycerate mutase [EC:5.4.2.11]	mmu00010|mmu00260|mmu01100|mmu01200|mmu01230|mmu04922|mmu05230	Glycolysis / Gluconeogenesis|Glycine, serine and threonine metabolism|Metabolic pathways|Carbon metabolism|Biosynthesis of amino acids|Glucagon signaling pathway|Central carbon metabolism in cancer	phosphoglycerate mutase 2	up
Xkrx	2.30519	0.000138059	0.000470219	29	26	20	4	9	3	ENSMUSG00000031258	331524	X	134149043	134162076	-	GO:0008150|biological_process	NA	NA	NA|(RefSeq) X-linked Kx blood group related, X-linked	NA	NA	X-linked Kx blood group related, X-linked	up
D6Ertd527e	2.84818	0.00227189	0.00636049	18	17	7	1	0	5	ENSMUSG00000090891	52372	6	87104746	87112997	+	GO:0008150|biological_process	NA	NA	NA|(RefSeq) DNA segment, Chr 6, ERATO Doi 527, expressed	NA	NA	DNA segment, Chr 6, ERATO Doi 527, expressed	up
Sstr5	5.512	0.000306093	0.000993604	13	7	4	0	0	0	ENSMUSG00000050824	20609	17	25489875	25497288	-	GO:0007165|signal transduction;GO:0007186|G protein-coupled receptor signaling pathway;GO:0007193|adenylate cyclase-inhibiting G protein-coupled receptor signaling pathway;GO:0032467|positive regulation of cytokinesis;GO:0038170|somatostatin signaling pat	NA	NA	K04221|somatostatin receptor 5	mmu04024|mmu04080	cAMP signaling pathway|Neuroactive ligand-receptor interaction	somatostatin receptor 5	up
Zfp521	-2.3462	5.96e-106	6.18e-104	204	157	173	1042	931	892	ENSMUSG00000024420	225207	18	13687013	13972733	-	GO:0007275|multicellular organism development;GO:0030154|cell differentiation;GO:0048663|neuron fate commitment	NA	NA	NA|(RefSeq) zinc finger protein 521	NA	NA	zinc finger protein 521	down
Pth2r	5.52109	0.000269099	0.000879885	5	7	12	0	0	0	ENSMUSG00000025946	213527	1	65282056	65389244	+	GO:0007165|signal transduction;GO:0007166|cell surface receptor signaling pathway;GO:0007186|G protein-coupled receptor signaling pathway;GO:0120162|positive regulation of cold-induced thermogenesis	NA	NA	K04586|parathyroid hormone receptor 2	mmu04080	Neuroactive ligand-receptor interaction	parathyroid hormone 2 receptor	up
Slc26a7	5.58286	0.000236299	0.000779239	4	14	7	0	0	0	ENSMUSG00000040569	208890	4	14502430	14621805	-	GO:0001696|gastric acid secretion;GO:0006811|ion transport;GO:0006820|anion transport;GO:0006821|chloride transport;GO:0008272|sulfate transport;GO:0015701|bicarbonate transport;GO:0019532|oxalate transport;GO:0055085|transmembrane transport;GO:0098656|an	NA	NA	K13962|solute carrier family 26 (anion exchange transporter), member 7	mmu04971	Gastric acid secretion	solute carrier family 26, member 7	up
Ptgfr	-4.97115	0.000646545	0.00199123	0	0	1	26	5	6	ENSMUSG00000028036	19220	3	151796502	151837630	-	GO:0007165|signal transduction;GO:0007186|G protein-coupled receptor signaling pathway;GO:0008284|positive regulation of cell population proliferation;GO:0010628|positive regulation of gene expression;GO:0032355|response to estradiol;GO:0032496|response t	NA	NA	K04262|prostaglandin F receptor	mmu04020|mmu04072|mmu04080	Calcium signaling pathway|Phospholipase D signaling pathway|Neuroactive ligand-receptor interaction	prostaglandin F receptor	down
Olfr1564	2.71094	4.47e-05	0.000162567	25	19	24	4	5	2	ENSMUSG00000096169	100043474	17	33211206	33221690	-	GO:0007165|signal transduction;GO:0007186|G protein-coupled receptor signaling pathway;GO:0007608|sensory perception of smell;GO:0050896|response to stimulus;GO:0050911|detection of chemical stimulus involved in sensory perception of smell;GO:0098664|G pr	NA	NA	K04257|olfactory receptor	mmu04740	Olfactory transduction	olfactory receptor 1564	up
Gm20033	-2.73368	0.00184404	0.00525492	3	1	2	16	11	15	ENSMUSG00000097640	NA	5	64708207	64804117	-	NA	NA	NA	NA	NA	NA	predicted gene, 20033	down
Osr1	-3.96495	8.78e-263	4.24e-260	95	89	86	1618	1514	1323	ENSMUSG00000048387	23967	12	9570116	9581500	+	GO:0000122|negative regulation of transcription by RNA polymerase II;GO:0001655|urogenital system development;GO:0001656|metanephros development;GO:0001657|ureteric bud development;GO:0001823|mesonephros development;GO:0002062|chondrocyte differentiation;	NA	NA	K09215|odd-skipped	NA	NA	odd-skipped related transcription factor 1	down
Ptgis	-2.38102	4.18e-32	7.58e-31	44	54	38	266	238	243	ENSMUSG00000017969	19223	2	167191805	167240604	-	GO:0001516|prostaglandin biosynthetic process;GO:0001666|response to hypoxia;GO:0006629|lipid metabolic process;GO:0006631|fatty acid metabolic process;GO:0006633|fatty acid biosynthetic process;GO:0006693|prostaglandin metabolic process;GO:0007566|embryo	NA	NA	K01831|prostacyclin synthase [EC:5.3.99.4]	mmu00590|mmu01100	Arachidonic acid metabolism|Metabolic pathways	prostaglandin I2 (prostacyclin) synthase	down
A3galt2	2.91217	8.18e-06	3.24e-05	26	29	23	6	1	4	ENSMUSG00000028794	215493	4	128755364	128769298	+	GO:0005975|carbohydrate metabolic process;GO:0006688|glycosphingolipid biosynthetic process;GO:0030259|lipid glycosylation	NA	NA	K20736|alpha-1,3-galactosyltransferase 2 [EC:2.4.1.87]	mmu00603|mmu01100	Glycosphingolipid biosynthesis - globo and isoglobo series|Metabolic pathways	alpha 1,3-galactosyltransferase 2 (isoglobotriaosylceramide synthase)	up
Olfr920	2.61019	3.23e-05	0.000119478	31	18	26	6	3	4	ENSMUSG00000061039	258783	9	38752299	38760117	+	GO:0007165|signal transduction;GO:0007186|G protein-coupled receptor signaling pathway;GO:0007608|sensory perception of smell;GO:0050896|response to stimulus;GO:0050911|detection of chemical stimulus involved in sensory perception of smell	NA	NA	K04257|olfactory receptor	mmu04740	Olfactory transduction	olfactory receptor 920	up
Sh2d6	-2.94956	7.26e-14	5.59e-13	6	7	21	94	111	73	ENSMUSG00000052631	71130	6	72513644	72521634	-	NA	NA	NA	NA|(RefSeq) SH2 domain containing 6	NA	NA	SH2 domain containing 6	down
Cfap53	4.14019	4.5e-09	2.43e-08	41	29	45	6	1	0	ENSMUSG00000035394	74453	18	74283090	74359986	+	GO:0003341|cilium movement;GO:0007275|multicellular organism development;GO:0007368|determination of left/right symmetry;GO:0060271|cilium assembly;GO:0060287|epithelial cilium movement involved in determination of left/right asymmetry	NA	NA	NA|(RefSeq) cilia and flagella associated protein 53	NA	NA	cilia and flagella associated protein 53	up
Cfap77	-2.14444	5.41e-19	5.57e-18	32	41	32	164	152	172	ENSMUSG00000079502	329375	2	28926949	29055066	-	GO:0008150|biological_process	NA	NA	NA|(RefSeq) cilia and flagella associated protein 77	NA	NA	cilia and flagella associated protein 77	down
Gm7168	4.93038	0.00285838	0.00785545	7	6	3	0	0	0	ENSMUSG00000067941	635895	17	13948373	13950678	+	GO:0006468|protein phosphorylation	NA	NA	NA|(RefSeq) predicted gene 7168	NA	NA	predicted gene 7168	up
Ociad2	2.64624	1.31e-05	5.07e-05	37	20	31	7	7	1	ENSMUSG00000029153	433904	5	73322199	73341028	-	GO:0009617|response to bacterium	NA	NA	NA|(RefSeq) OCIA domain containing 2	NA	NA	OCIA domain containing 2	up
Pdgfrb	-4.06446	1.23e-264	6.08e-262	90	91	88	1856	1474	1435	ENSMUSG00000024620	18596	18	61045150	61085061	+	GO:0006024|glycosaminoglycan biosynthetic process;GO:0006468|protein phosphorylation;GO:0006935|chemotaxis;GO:0007165|signal transduction;GO:0007169|transmembrane receptor protein tyrosine kinase signaling pathway;GO:0007275|multicellular organism develop	NA	NA	K05089|platelet-derived growth factor receptor beta [EC:2.7.10.1]	mmu01521|mmu04010|mmu04014|mmu04015|mmu04020|mmu04072|mmu04151|mmu04510|mmu04540|mmu04630|mmu04810|mmu05165|mmu05166|mmu05200|mmu05206|mmu05214|mmu05215|mmu05218|mmu05230|mmu05231	EGFR tyrosine kinase inhibitor resistance|MAPK signaling pathway|Ras signaling pathway|Rap1 signaling pathway|Calcium signaling pathway|Phospholipase D signaling pathway|PI3K-Akt signaling pathway|Focal adhesion|Gap junction|Jak-STAT signaling pathway|Reg	platelet derived growth factor receptor, beta polypeptide	down
Scarf1	4.2629	0.000759483	0.00231175	7	12	17	1	1	0	ENSMUSG00000038188	380713	11	75513540	75526582	+	GO:0006898|receptor-mediated endocytosis;GO:0007155|cell adhesion;GO:0010976|positive regulation of neuron projection development;GO:0016322|neuron remodeling;GO:0016358|dendrite development;GO:0048680|positive regulation of axon regeneration	NA	NA	NA|(RefSeq) scavenger receptor class F, member 1	NA	NA	scavenger receptor class F, member 1	up
Gm19325	2.58391	0.00128798	0.00377457	16	20	14	7	0	2	ENSMUSG00000101365	NA	9	97047444	97067307	-	NA	NA	NA	NA	NA	NA	predicted gene, 19325	up
Cela1	-3.10866	3.27e-09	1.79e-08	7	4	4	44	49	43	ENSMUSG00000023031	109901	15	100674421	100687921	-	GO:0000122|negative regulation of transcription by RNA polymerase II;GO:0006508|proteolysis;GO:0006954|inflammatory response;GO:0009791|post-embryonic development;GO:0016055|Wnt signaling pathway;GO:0031017|exocrine pancreas development;GO:0035264|multice	NA	NA	K01326|pancreatic elastase I [EC:3.4.21.36]	NA	NA	chymotrypsin-like elastase family, member 1	down
Stkld1	3.17454	0.0019716	0.00559035	12	15	7	2	1	1	ENSMUSG00000049897	279029	2	26934047	26953496	+	GO:0006468|protein phosphorylation;GO:0008150|biological_process	NA	NA	K17546|serine/threonine kinase-like domain-containing protein STKLD1	NA	NA	serine/threonine kinase-like domain containing 1	up
Tnfsf10	3.50653	0.000403361	0.00128577	23	9	11	2	1	1	ENSMUSG00000039304	22035	3	27317028	27342427	+	GO:0006915|apoptotic process;GO:0006955|immune response;GO:0008584|male gonad development;GO:0010469|regulation of signaling receptor activity;GO:0032868|response to insulin;GO:0043065|positive regulation of apoptotic process;GO:0043123|positive regulatio	NA	NA	K04721|tumor necrosis factor ligand superfamily member 10	mmu04060|mmu04068|mmu04210|mmu04217|mmu04650|mmu05162|mmu05164	Cytokine-cytokine receptor interaction|FoxO signaling pathway|Apoptosis|Necroptosis|Natural killer cell mediated cytotoxicity|Measles|Influenza A	tumor necrosis factor (ligand) superfamily, member 10	up
Olfr461	4.48997	0.00288512	0.00792266	11	4	8	0	1	0	ENSMUSG00000068259	258380	6	40542171	40555050	-	GO:0007165|signal transduction;GO:0007186|G protein-coupled receptor signaling pathway;GO:0007608|sensory perception of smell;GO:0050896|response to stimulus;GO:0050911|detection of chemical stimulus involved in sensory perception of smell	NA	NA	K04257|olfactory receptor	mmu04740	Olfactory transduction	olfactory receptor 461	up
Cemip	-3.4496	1.2e-07	5.73e-07	4	1	4	30	39	34	ENSMUSG00000052353	80982	7	83932857	84086502	-	GO:0007605|sensory perception of sound;GO:0008152|metabolic process;GO:0010800|positive regulation of peptidyl-threonine phosphorylation;GO:0030214|hyaluronan catabolic process;GO:0030335|positive regulation of cell migration;GO:0051281|positive regulatio	NA	NA	K19031|cell migration-inducing and hyaluronan-binding protein [EC:3.2.1.35]	NA	NA	cell migration inducing protein, hyaluronan binding	down
Cngb1	-2.28418	4.94e-11	3.1e-10	13	18	16	104	79	61	ENSMUSG00000031789	333329	8	95239045	95306585	-	GO:0001895|retina homeostasis;GO:0006812|cation transport;GO:0007601|visual perception;GO:0007602|phototransduction;GO:0007608|sensory perception of smell;GO:0033365|protein localization to organelle;GO:0034220|ion transmembrane transport;GO:0035845|photo	NA	NA	K04952|cyclic nucleotide gated channel beta 1	mmu04022|mmu04024|mmu04740|mmu04744	cGMP-PKG signaling pathway|cAMP signaling pathway|Olfactory transduction|Phototransduction	cyclic nucleotide gated channel beta 1	down
Gm19426	-3.49412	1.47e-06	6.35e-06	1	3	3	28	26	29	ENSMUSG00000097187	NA	2	84742169	84743655	-	NA	NA	NA	NA	NA	NA	predicted gene, 19426	down
Klra2	3.58394	0.00133496	0.00389743	6	13	15	1	1	1	ENSMUSG00000030187	16633	6	131219223	131247362	-	NA	NA	GO:0016020|membrane;GO:0016021|integral component of membrane	NA|(RefSeq) killer cell lectin-like receptor, subfamily A, member 2	NA	NA	killer cell lectin-like receptor, subfamily A, member 2	up
Ceacam10	4.61145	0.00181278	0.00517655	11	5	9	0	0	1	ENSMUSG00000054169	26366	7	24777206	24784657	+	NA	NA	NA	K06499|carcinoembryonic antigen-related cell adhesion molecule	NA	NA	carcinoembryonic antigen-related cell adhesion molecule 10	up
Gprin3	-4.26323	3.22e-09	1.76e-08	1	1	4	37	44	40	ENSMUSG00000045441	243385	6	59347226	59426294	-	GO:0008150|biological_process	NA	NA	NA|(RefSeq) GPRIN family member 3	NA	NA	GPRIN family member 3	down
Gm34776	6.51793	1.3e-06	5.65e-06	16	16	16	0	0	0	ENSMUSG00000112168	NA	10	72940238	72949792	-	NA	NA	NA	NA	NA	NA	predicted gene, 34776	up
Dlgap2	-5.88928	3.67e-05	0.000134606	0	0	0	17	9	9	ENSMUSG00000047495	244310	8	14095865	14847680	+	GO:0007270|neuron-neuron synaptic transmission;GO:0023052|signaling	NA	NA	NA|(RefSeq) DLG associated protein 2	NA	NA	DLG associated protein 2	down
Dnah2	3.85944	3.29e-05	0.000121459	19	16	20	2	0	2	ENSMUSG00000005237	327954	11	69420809	69549110	-	GO:0007018|microtubule-based movement	NA	NA	K10408|dynein heavy chain, axonemal	mmu05016	Huntington disease	dynein, axonemal, heavy chain 2	up
Gm10800	-2.11058	0.000539005	0.00168204	5	6	5	37	18	19	ENSMUSG00000075014	NA	2	98666547	98667301	-	GO:0008150|biological_process	NA	NA	NA	NA	NA	predicted gene 10800	down
Gm19253	3.93442	3.25e-07	1.5e-06	29	39	19	1	4	1	ENSMUSG00000107758	NA	6	49071630	49071936	+	NA	NA	NA	NA	NA	NA	predicted gene, 19253	up
Myo1a	2.24974	1.26e-14	1.01e-13	115	107	92	28	26	16	ENSMUSG00000025401	432516	10	127705170	127720940	+	GO:0007605|sensory perception of sound;GO:0030030|cell projection organization;GO:0030033|microvillus assembly;GO:0032880|regulation of protein localization;GO:0051648|vesicle localization	NA	NA	K10356|myosin I	NA	NA	myosin IA	up
4930447F24Rik	-3.13597	1.09e-77	6.7e-76	47	70	52	522	516	525	ENSMUSG00000102224	76873	9	108133718	108138567	+	NA	NA	NA	NA|(RefSeq) RIKEN cDNA 4930447F24 gene	NA	NA	RIKEN cDNA 4930447F24 gene	down
Myo7a	2.50895	1.41e-27	2.15e-26	211	226	184	48	46	22	ENSMUSG00000030761	17921	7	98051060	98119524	-	GO:0001845|phagolysosome assembly;GO:0006886|intracellular protein transport;GO:0006909|phagocytosis;GO:0007040|lysosome organization;GO:0007600|sensory perception;GO:0007601|visual perception;GO:0007605|sensory perception of sound;GO:0030030|cell project	NA	NA	K10359|myosin VIIa	NA	NA	myosin VIIA	up
Olfr1317	-4.60415	0.00163743	0.0047036	1	0	0	13	9	6	ENSMUSG00000050776	258440	2	112140329	112144054	+	GO:0007165|signal transduction;GO:0007186|G protein-coupled receptor signaling pathway;GO:0007608|sensory perception of smell;GO:0050896|response to stimulus;GO:0050911|detection of chemical stimulus involved in sensory perception of smell	NA	NA	K04257|olfactory receptor	mmu04740	Olfactory transduction	olfactory receptor 1317	down
Olfr1318	-2.09866	2.42e-06	1.02e-05	13	8	9	49	53	34	ENSMUSG00000049758	258022	2	112154198	112159157	+	GO:0007165|signal transduction;GO:0007186|G protein-coupled receptor signaling pathway;GO:0007608|sensory perception of smell;GO:0050896|response to stimulus;GO:0050911|detection of chemical stimulus involved in sensory perception of smell	NA	NA	K04257|olfactory receptor	mmu04740	Olfactory transduction	olfactory receptor 1318	down
Gamt	-2.58354	1.51e-55	5.52e-54	65	62	67	408	407	408	ENSMUSG00000020150	14431	10	80258151	80261012	-	GO:0006601|creatine biosynthetic process;GO:0007283|spermatogenesis;GO:0009887|animal organ morphogenesis;GO:0032259|methylation;GO:0040014|regulation of multicellular organism growth;GO:0046498|S-adenosylhomocysteine metabolic process;GO:0046500|S-adenos	NA	NA	K00542|guanidinoacetate N-methyltransferase [EC:2.1.1.2]	mmu00260|mmu00330|mmu01100	Glycine, serine and threonine metabolism|Arginine and proline metabolism|Metabolic pathways	guanidinoacetate methyltransferase	down
Btg2	2.0371	1.01e-97	9.23e-96	1326	1390	1243	333	316	365	ENSMUSG00000020423	12227	1	134075170	134079120	-	GO:0000122|negative regulation of transcription by RNA polymerase II;GO:0006479|protein methylation;GO:0006974|cellular response to DNA damage stimulus;GO:0008285|negative regulation of cell population proliferation;GO:0008306|associative learning;GO:0009	NA	NA	K14443|protein Tob/BTG	mmu03018	RNA degradation	B cell translocation gene 2, anti-proliferative	up
Gas1	-3.12221	0	0	325	375	307	3559	2814	2901	ENSMUSG00000052957	14451	13	60174405	60177365	-	GO:0002053|positive regulation of mesenchymal cell proliferation;GO:0007049|cell cycle;GO:0007050|cell cycle arrest;GO:0007411|axon guidance;GO:0008284|positive regulation of cell population proliferation;GO:0008589|regulation of smoothened signaling path	NA	NA	K06232|growth arrest-specific 1	mmu04340	Hedgehog signaling pathway	growth arrest specific 1	down
Gas7	-3.82305	0	0	121	114	128	1921	1831	1669	ENSMUSG00000033066	14457	11	67455437	67688990	+	NA	NA	NA	K18618|growth arrest-specific protein 7	NA	NA	growth arrest specific 7	down
Chrnb1	2.17219	2.49e-86	1.84e-84	759	825	856	213	176	183	ENSMUSG00000041189	11443	11	69784036	69795943	-	GO:0001941|postsynaptic membrane organization;GO:0003009|skeletal muscle contraction;GO:0006811|ion transport;GO:0006812|cation transport;GO:0006936|muscle contraction;GO:0007165|signal transduction;GO:0007271|synaptic transmission, cholinergic;GO:0007274	NA	NA	K04812|nicotinic acetylcholine receptor beta-1	mmu04080	Neuroactive ligand-receptor interaction	cholinergic receptor, nicotinic, beta polypeptide 1 (muscle)	up
Adamts1	-2.29766	3.62e-301	2.33e-298	799	801	774	4794	3900	3667	ENSMUSG00000022893	11504	16	85793827	85803113	-	GO:0001542|ovulation from ovarian follicle;GO:0001822|kidney development;GO:0006508|proteolysis;GO:0010976|positive regulation of neuron projection development;GO:0016525|negative regulation of angiogenesis;GO:0060347|heart trabecula formation;GO:1900087|	NA	NA	K08617|a disintegrin and metalloproteinase with thrombospondin motifs 1 [EC:3.4.24.-]	NA	NA	a disintegrin-like and metallopeptidase (reprolysin type) with thrombospondin type 1 motif, 1	down
Adamts5	-2.9396	0	0	906	863	924	8535	6932	6424	ENSMUSG00000022894	23794	16	85856173	85901828	-	GO:0006508|proteolysis;GO:0042742|defense response to bacterium;GO:0044691|tooth eruption;GO:0120163|negative regulation of cold-induced thermogenesis	NA	NA	K08620|a disintegrin and metalloproteinase with thrombospondin motifs 5 [EC:3.4.24.-]	NA	NA	a disintegrin-like and metallopeptidase (reprolysin type) with thrombospondin type 1 motif, 5 (aggrecanase-2)	down
Ptpn3	5.45145	0.000422745	0.0013429	12	8	3	0	0	0	ENSMUSG00000038764	545622	4	57190841	57301837	-	GO:0006470|protein dephosphorylation;GO:0016311|dephosphorylation;GO:0035335|peptidyl-tyrosine dephosphorylation;GO:0045930|negative regulation of mitotic cell cycle;GO:0051045|negative regulation of membrane protein ectodomain proteolysis;GO:0097421|live	NA	NA	K18027|tyrosine-protein phosphatase non-receptor type 3 [EC:3.1.3.48]	NA	NA	protein tyrosine phosphatase, non-receptor type 3	up
Galnt9	-5.76796	0.000108409	0.000375259	0	0	0	22	7	4	ENSMUSG00000033316	231605	5	110544355	110621380	+	GO:0006486|protein glycosylation;GO:0008150|biological_process	NA	NA	NA|(RefSeq) polypeptide N-acetylgalactosaminyltransferase 9	NA	NA	polypeptide N-acetylgalactosaminyltransferase 9	down
Gsdmc4	2.39746	0.00322567	0.0087786	22	14	9	2	6	1	ENSMUSG00000055748	74548	15	63891264	63912297	-	GO:0008150|biological_process;GO:0012501|programmed cell death	NA	NA	K22143|gasdermin-C	NA	NA	gasdermin C4	up
Ranbp3l	-3.55698	9.83e-05	0.000342238	5	0	0	20	13	28	ENSMUSG00000048424	223332	15	8967949	9067335	+	GO:0046907|intracellular transport	NA	NA	NA|(RefSeq) RAN binding protein 3-like	NA	NA	RAN binding protein 3-like	down
Gbp4	5.48814	9.53e-30	1.58e-28	164	167	138	1	6	4	ENSMUSG00000079363	17472	5	105115767	105139586	-	GO:0000122|negative regulation of transcription by RNA polymerase II;GO:0001933|negative regulation of protein phosphorylation;GO:0031397|negative regulation of protein ubiquitination;GO:0032687|negative regulation of interferon-alpha production;GO:004230	NA	NA	K20908|guanylate-binding protein 6	NA	NA	guanylate binding protein 4	up
Gbp3	2.60615	1.44e-35	3.04e-34	221	225	218	39	38	38	ENSMUSG00000028268	55932	3	142560026	142573209	+	GO:0035458|cellular response to interferon-beta;GO:0042832|defense response to protozoan;GO:0044406|adhesion of symbiont to host;GO:0050830|defense response to Gram-positive bacterium;GO:0071346|cellular response to interferon-gamma	NA	NA	K20899|guanylate-binding protein 1/3/4/7	mmu04621	NOD-like receptor signaling pathway	guanylate binding protein 3	up
Gbp7	2.04804	5.59e-23	7e-22	226	194	175	59	46	47	ENSMUSG00000040253	229900	3	142530342	142550149	+	GO:0042832|defense response to protozoan;GO:0044406|adhesion of symbiont to host;GO:0050830|defense response to Gram-positive bacterium;GO:0071346|cellular response to interferon-gamma	NA	NA	K20899|guanylate-binding protein 1/3/4/7	mmu04621	NOD-like receptor signaling pathway	guanylate binding protein 7	up
Gbp9	2.89043	1.5e-23	1.93e-22	192	155	120	21	16	29	ENSMUSG00000029298	236573	5	105077630	105139539	-	GO:0042832|defense response to protozoan;GO:0044406|adhesion of symbiont to host;GO:0050830|defense response to Gram-positive bacterium;GO:0071346|cellular response to interferon-gamma	NA	NA	K20908|guanylate-binding protein 6	NA	NA	guanylate-binding protein 9	up
Myom2	4.61358	0.00182205	0.00520068	9	5	11	1	0	0	ENSMUSG00000031461	17930	8	15057653	15133541	+	GO:0002074|extraocular skeletal muscle development;GO:0006936|muscle contraction	NA	NA	NA|(RefSeq) myomesin 2	NA	NA	myomesin 2	up
Gch1	3.149	3.55e-27	5.33e-26	160	138	163	26	9	20	ENSMUSG00000037580	14528	14	47153895	47189413	-	GO:0006729|tetrahydrobiopterin biosynthetic process;GO:0008152|metabolic process;GO:0008217|regulation of blood pressure;GO:0010460|positive regulation of heart rate;GO:0014916|regulation of lung blood pressure;GO:0032496|response to lipopolysaccharide;GO	NA	NA	K01495|GTP cyclohydrolase IA [EC:3.5.4.16]	mmu00790|mmu01100	Folate biosynthesis|Metabolic pathways	GTP cyclohydrolase 1	up
Ankrd13b	-2.38431	7.65e-103	7.57e-101	155	152	166	950	903	758	ENSMUSG00000037907	268445	11	77470485	77489678	-	GO:0002091|negative regulation of receptor internalization;GO:0008150|biological_process	NA	NA	K21437|ankyrin repeat domain-containing protein 13	NA	NA	ankyrin repeat domain 13b	down
Grb10	-2.34291	0	0	2164	2367	2373	12827	12182	11898	ENSMUSG00000020176	14783	11	11930508	12038683	-	GO:0007165|signal transduction;GO:0008286|insulin receptor signaling pathway;GO:0009967|positive regulation of signal transduction;GO:0030178|negative regulation of Wnt signaling pathway;GO:0030949|positive regulation of vascular endothelial growth factor	NA	NA	K20064|growth factor receptor-bound protein 10	mmu04150	mTOR signaling pathway	growth factor receptor bound protein 10	down
P2rx7	2.16364	1.38e-20	1.55e-19	173	163	154	46	44	26	ENSMUSG00000029468	18439	5	122643911	122691432	+	GO:0000187|activation of MAPK activity;GO:0000902|cell morphogenesis;GO:0001845|phagolysosome assembly;GO:0001916|positive regulation of T cell mediated cytotoxicity;GO:0001934|positive regulation of protein phosphorylation;GO:0006468|protein phosphorylat	NA	NA	K05220|P2X purinoceptor 7	mmu04020|mmu04080|mmu04621	Calcium signaling pathway|Neuroactive ligand-receptor interaction|NOD-like receptor signaling pathway	purinergic receptor P2X, ligand-gated ion channel, 7	up
P2rx3	-3.23183	2.38e-24	3.16e-23	15	16	11	134	165	117	ENSMUSG00000027071	228139	2	84998583	85037462	-	GO:0001666|response to hypoxia;GO:0006811|ion transport;GO:0006812|cation transport;GO:0007268|chemical synaptic transmission;GO:0007274|neuromuscular synaptic transmission;GO:0009266|response to temperature stimulus;GO:0009408|response to heat;GO:0009409	NA	NA	K05217|P2X purinoceptor 3	mmu04020|mmu04080|mmu04742	Calcium signaling pathway|Neuroactive ligand-receptor interaction|Taste transduction	purinergic receptor P2X, ligand-gated ion channel, 3	down
D930028M14Rik	-4.47365	0.00307936	0.00841244	1	0	0	10	3	12	ENSMUSG00000074274	434147	7	25152457	25156627	+	NA	NA	NA	NA|(RefSeq) RIKEN cDNA D930028M14 gene	NA	NA	RIKEN cDNA D930028M14 gene	down
Nr4a3	2.31285	2.02e-05	7.65e-05	26	33	30	7	8	4	ENSMUSG00000028341	18124	4	48045153	48086447	+	GO:0000122|negative regulation of transcription by RNA polymerase II;GO:0001707|mesoderm formation;GO:0006355|regulation of transcription, DNA-templated;GO:0007369|gastrulation;GO:0007411|axon guidance;GO:0009444|pyruvate oxidation;GO:0010613|positive reg	NA	NA	K08559|nuclear receptor subfamily 4 group A member 3	mmu05202	Transcriptional misregulation in cancer	nuclear receptor subfamily 4, group A, member 3	up
Myrfl	4.98598	1.58e-13	1.18e-12	55	68	57	2	2	2	ENSMUSG00000034057	237558	10	116776535	116896919	-	GO:0006355|regulation of transcription, DNA-templated	NA	NA	NA|(RefSeq) myelin regulatory factor-like	NA	NA	myelin regulatory factor-like	up
Tle2	-3.53828	8.84e-58	3.42e-56	33	33	18	423	324	289	ENSMUSG00000034771	21886	10	81574561	81590845	+	GO:0006355|regulation of transcription, DNA-templated;GO:0016055|Wnt signaling pathway;GO:0045892|negative regulation of transcription, DNA-templated;GO:0090090|negative regulation of canonical Wnt signaling pathway	NA	NA	NA|(RefSeq) transducin-like enhancer of split 2	NA	NA	transducin-like enhancer of split 2	down
Dnhd1	3.59981	1.2e-13	9.09e-13	78	50	67	5	10	2	ENSMUSG00000030882	77505	7	105650827	105721799	+	GO:0007018|microtubule-based movement	NA	NA	NA|(RefSeq) dynein heavy chain domain 1	NA	NA	dynein heavy chain domain 1	up
Tlr1	-2.72471	4.39e-11	2.77e-10	10	6	13	77	53	72	ENSMUSG00000044827	21897	5	64924679	64933563	-	GO:0001774|microglial cell activation;GO:0001775|cell activation;GO:0002224|toll-like receptor signaling pathway;GO:0002376|immune system process;GO:0002755|MyD88-dependent toll-like receptor signaling pathway;GO:0006952|defense response;GO:0006954|inflam	NA	NA	K05398|toll-like receptor 1	mmu04620|mmu05152	Toll-like receptor signaling pathway|Tuberculosis	toll-like receptor 1	down
Mamstr	-2.08731	2.75e-36	5.92e-35	73	77	70	386	310	294	ENSMUSG00000042918	74490	7	45639977	45646521	+	GO:0010831|positive regulation of myotube differentiation;GO:0045944|positive regulation of transcription by RNA polymerase II	NA	NA	NA|(RefSeq) MEF2 activating motif and SAP domain containing transcriptional regulator	NA	NA	MEF2 activating motif and SAP domain containing transcriptional regulator	down
Gm34248	3.39692	4.28e-05	0.000156066	26	16	17	4	2	0	ENSMUSG00000105542	NA	5	146199985	146200458	-	NA	NA	NA	NA	NA	NA	predicted gene, 34248	up
Stab1	4.93616	0.00280063	0.00770662	4	8	4	0	0	0	ENSMUSG00000042286	192187	14	31139013	31168641	-	GO:0006898|receptor-mediated endocytosis;GO:0007155|cell adhesion;GO:0007267|cell-cell signaling;GO:0016525|negative regulation of angiogenesis;GO:0042742|defense response to bacterium	NA	NA	K19020|stabilin-1	NA	NA	stabilin 1	up
Zfp811	2.88798	1.17e-26	1.72e-25	179	148	156	23	32	14	ENSMUSG00000055202	240063	17	32795676	32809853	-	GO:0006355|regulation of transcription, DNA-templated;GO:0008150|biological_process	NA	NA	K09228|KRAB domain-containing zinc finger protein	NA	NA	zinc finger protein 811	up
E230016K23Rik	-3.11384	2.91e-09	1.6e-08	8	1	11	103	47	37	ENSMUSG00000051832	100504464	11	83582056	83623693	+	NA	NA	NA	NA|(RefSeq) RIKEN cDNA E230016K23 gene	NA	NA	RIKEN cDNA E230016K23 gene	down
Tns4	-2.29588	9.67e-05	0.000336811	5	7	4	37	29	18	ENSMUSG00000017607	217169	11	99065678	99089306	-	GO:0006915|apoptotic process;GO:0008104|protein localization	NA	NA	K18080|tensin	NA	NA	tensin 4	down
Hmox1	2.09045	7.16e-170	1.61e-167	2373	2756	2665	728	638	571	ENSMUSG00000005413	15368	8	75093621	75100589	+	GO:0001525|angiogenesis;GO:0001666|response to hypoxia;GO:0002246|wound healing involved in inflammatory response;GO:0006788|heme oxidation;GO:0006879|cellular iron ion homeostasis;GO:0006915|apoptotic process;GO:0006979|response to oxidative stress;GO:00	NA	NA	K00510|heme oxygenase 1 [EC:1.14.14.18]	mmu00860|mmu01100|mmu04066|mmu04216|mmu04978|mmu05200|mmu05206|mmu05225|mmu05418	Porphyrin and chlorophyll metabolism|Metabolic pathways|HIF-1 signaling pathway|Ferroptosis|Mineral absorption|Pathways in cancer|MicroRNAs in cancer|Hepatocellular carcinoma|Fluid shear stress and atherosclerosis	heme oxygenase 1	up
Pbx1	-2.42736	5.98e-192	1.6e-189	354	362	313	2124	2036	1692	ENSMUSG00000052534	18514	1	168119364	168432270	-	GO:0001655|urogenital system development;GO:0001658|branching involved in ureteric bud morphogenesis;GO:0006355|regulation of transcription, DNA-templated;GO:0006694|steroid biosynthetic process;GO:0007275|multicellular organism development;GO:0007548|sex	NA	NA	K09355|pre-B-cell leukemia transcription factor 1	mmu04927|mmu04934|mmu05202	Cortisol synthesis and secretion|Cushing syndrome|Transcriptional misregulation in cancer	pre B cell leukemia homeobox 1	down
S100a4	-2.54207	4.51e-11	2.84e-10	9	13	12	79	58	72	ENSMUSG00000001020	20198	3	90603771	90606045	+	GO:0043123|positive regulation of I-kappaB kinase/NF-kappaB signaling	NA	NA	NA|(RefSeq) S100 calcium binding protein A4	NA	NA	S100 calcium binding protein A4	down
Pycr1	-3.00783	6.93e-88	5.18e-86	71	78	58	689	545	529	ENSMUSG00000025140	209027	11	120635712	120643769	-	GO:0006561|proline biosynthetic process;GO:0008652|cellular amino acid biosynthetic process;GO:0034599|cellular response to oxidative stress;GO:0051881|regulation of mitochondrial membrane potential;GO:0055114|oxidation-reduction process;GO:0055129|L-prol	NA	NA	K00286|pyrroline-5-carboxylate reductase [EC:1.5.1.2]	mmu00330|mmu01100|mmu01230	Arginine and proline metabolism|Metabolic pathways|Biosynthesis of amino acids	pyrroline-5-carboxylate reductase 1	down
Crybg1	-2.28032	1.8e-18	1.82e-17	39	24	23	157	142	141	ENSMUSG00000019866	11630	10	43950636	44148853	-	GO:0008150|biological_process	NA	NA	NA|(RefSeq) crystallin beta-gamma domain containing 1	NA	NA	crystallin beta-gamma domain containing 1	down
Pck2	-2.27486	1.56e-266	7.92e-264	617	641	593	3467	3246	2760	ENSMUSG00000040618	74551	14	55540266	55551242	+	GO:0006090|pyruvate metabolic process;GO:0006094|gluconeogenesis;GO:0006107|oxaloacetate metabolic process;GO:0006116|NADH oxidation;GO:0032024|positive regulation of insulin secretion	NA	NA	K01596|phosphoenolpyruvate carboxykinase (GTP) [EC:4.1.1.32]	mmu00010|mmu00020|mmu00620|mmu01100|mmu03320|mmu04068|mmu04151|mmu04152|mmu04910|mmu04920|mmu04922|mmu04931|mmu04964	Glycolysis / Gluconeogenesis|Citrate cycle (TCA cycle)|Pyruvate metabolism|Metabolic pathways|PPAR signaling pathway|FoxO signaling pathway|PI3K-Akt signaling pathway|AMPK signaling pathway|Insulin signaling pathway|Adipocytokine signaling pathway|Glucago	phosphoenolpyruvate carboxykinase 2 (mitochondrial)	down
Gm48626	5.10417	0.00181447	0.00518059	6	10	2	0	0	0	ENSMUSG00000114061	NA	13	35027354	35031946	-	NA	NA	NA	NA	NA	NA	predicted gene, 48626	up
Gjb4	-2.24664	1.53e-10	9.27e-10	10	15	23	91	74	76	ENSMUSG00000046623	14621	4	127351086	127354081	-	GO:0007154|cell communication;GO:0007608|sensory perception of smell;GO:0042048|olfactory behavior	NA	NA	K07623|gap junction beta-4 protein	NA	NA	gap junction protein, beta 4	down
Gm14018	2.22046	4.74e-07	2.15e-06	40	49	43	13	7	10	ENSMUSG00000084407	NA	2	121485432	121491512	+	NA	NA	NA	NA	NA	NA	predicted gene 14018	up
Tbc1d10c	-2.18733	0.000999174	0.002989	6	3	4	25	25	13	ENSMUSG00000040247	108995	19	4184358	4191047	-	GO:0042147|retrograde transport, endosome to Golgi;GO:0050869|negative regulation of B cell activation;GO:0070373|negative regulation of ERK1 and ERK2 cascade;GO:0070885|negative regulation of calcineurin-NFAT signaling cascade	NA	NA	K19944|TBC1 domain family member 10	NA	NA	TBC1 domain family, member 10c	down
Calr3	2.92674	8.97e-24	1.16e-22	141	125	145	16	27	14	ENSMUSG00000019732	73316	8	72424176	72443870	-	GO:0006457|protein folding;GO:0007283|spermatogenesis;GO:0030154|cell differentiation	NA	NA	K10098|calreticulin 3	NA	NA	calreticulin 3	up
Nlrp4a	5.68465	0.000114457	0.000394005	12	8	7	0	0	0	ENSMUSG00000040601	243880	7	26435113	26476142	+	GO:0006952|defense response;GO:0006954|inflammatory response	NA	NA	NA|(RefSeq) NLR family, pyrin domain containing 4A	NA	NA	NLR family, pyrin domain containing 4A	up
Nlrp4c	3.95899	0.00224509	0.00629368	8	10	12	0	0	2	ENSMUSG00000034690	83564	7	6045161	6105150	+	GO:0006954|inflammatory response;GO:0008150|biological_process	NA	NA	K22265|NACHT, LRR and PYD domains-containing protein 4	NA	NA	NLR family, pyrin domain containing 4C	up
Peg3	2.04619	1.04e-213	3.46e-211	2835	2668	2880	836	679	633	ENSMUSG00000002265	18616	7	6703892	6730431	-	GO:0000122|negative regulation of transcription by RNA polymerase II;GO:0006915|apoptotic process;GO:0010468|regulation of gene expression;GO:0045944|positive regulation of transcription by RNA polymerase II	NA	NA	K09230|SCAN domain-containing zinc finger protein	NA	NA	paternally expressed 3	up
Ppm1h	-2.91089	1.53e-31	2.72e-30	26	29	20	241	197	161	ENSMUSG00000034613	319468	10	122678762	122945795	+	GO:0006470|protein dephosphorylation	NA	NA	K17503|protein phosphatase 1H [EC:3.1.3.16]	NA	NA	protein phosphatase 1H (PP2C domain containing)	down
Per2	-2.19476	3.18e-11	2.02e-10	18	24	12	101	87	74	ENSMUSG00000055866	18627	1	91415982	91459324	-	GO:0000122|negative regulation of transcription by RNA polymerase II;GO:0007623|circadian rhythm;GO:0045892|negative regulation of transcription, DNA-templated	NA	NA	K02633|period circadian protein 2	mmu04710|mmu04713|mmu05168|mmu05202|mmu05221	Circadian rhythm|Circadian entrainment|Herpes simplex infection|Transcriptional misregulation in cancer|Acute myeloid leukemia	period circadian clock 2	down
Cyp3a41a	2.19789	0.00294209	0.00806255	13	12	36	2	10	2	ENSMUSG00000075551	53973	5	145694049	145720136	-	GO:0009617|response to bacterium;GO:0010468|regulation of gene expression;GO:0055114|oxidation-reduction process;GO:0070988|demethylation	NA	NA	K07424|cytochrome P450 family 3 subfamily A [EC:1.14.14.1]	mmu00140|mmu00591|mmu00830|mmu01100|mmu05204	Steroid hormone biosynthesis|Linoleic acid metabolism|Retinol metabolism|Metabolic pathways|Chemical carcinogenesis	cytochrome P450, family 3, subfamily a, polypeptide 41A	up
Gm14221	3.91102	3.13e-07	1.44e-06	34	26	25	4	0	2	ENSMUSG00000078956	NA	2	160568379	160619971	-	NA	NA	NA	NA	NA	NA	predicted gene 14221	up
Glt8d2	2.64018	1.48e-91	1.21e-89	635	625	716	128	101	106	ENSMUSG00000020251	74782	10	82650433	82690650	-	NA	GO:0016740|transferase activity;GO:0016757|transferase activity, transferring glycosyl groups	NA	NA|(RefSeq) glycosyltransferase 8 domain containing 2	NA	NA	glycosyltransferase 8 domain containing 2	up
Cd300lb	3.431	7.78e-12	5.16e-11	62	60	41	6	7	3	ENSMUSG00000063193	217304	11	114922781	114934386	-	NA	NA	GO:0016020|membrane;GO:0016021|integral component of membrane	K20395|CO300B/D/F antigen	NA	NA	CD300 molecule like family member B	up
Gli1	-2.98992	1.01e-08	5.32e-08	6	6	4	38	48	47	ENSMUSG00000025407	14632	10	127329882	127341974	-	GO:0001649|osteoblast differentiation;GO:0007165|signal transduction;GO:0007224|smoothened signaling pathway;GO:0007275|multicellular organism development;GO:0007283|spermatogenesis;GO:0007418|ventral midline development;GO:0008284|positive regulation of	NA	NA	K16797|zinc finger protein GLI1	mmu04024|mmu04340|mmu05200|mmu05217	cAMP signaling pathway|Hedgehog signaling pathway|Pathways in cancer|Basal cell carcinoma	GLI-Kruppel family member GLI1	down
Rasl11a	-2.91682	5.34e-12	3.6e-11	12	5	8	70	69	60	ENSMUSG00000029641	68895	5	146845071	146847726	+	GO:0007165|signal transduction;GO:0045943|positive regulation of transcription by RNA polymerase I	NA	NA	K07852|Ras-like protein family member 11A	NA	NA	RAS-like, family 11, member A	down
Plscr2	2.58884	1.27e-14	1.02e-13	84	85	97	20	18	9	ENSMUSG00000032372	18828	9	92275602	92297752	+	GO:0071222|cellular response to lipopolysaccharide	NA	NA	NA|(RefSeq) phospholipid scramblase 2	NA	NA	phospholipid scramblase 2	up
Cntn3	7.8739	2.79e-10	1.66e-09	47	35	41	0	0	0	ENSMUSG00000030075	18488	6	102162655	102573101	-	GO:0007155|cell adhesion;GO:0007399|nervous system development	NA	NA	K06761|contactin 3	NA	NA	contactin 3	up
Plac1	-4.37416	7.59e-17	6.89e-16	5	4	2	99	74	69	ENSMUSG00000061082	56096	X	53069995	53240111	-	GO:0001890|placenta development;GO:0007275|multicellular organism development;GO:0090214|spongiotrophoblast layer developmental growth	NA	NA	NA|(RefSeq) placental specific protein 1	NA	NA	placental specific protein 1	down
Chrdl1	-5.48957	0.000228357	0.000754853	0	0	0	8	9	9	ENSMUSG00000031283	83453	X	143285674	143394262	-	GO:0001503|ossification;GO:0001654|eye development;GO:0001709|cell fate determination;GO:0007275|multicellular organism development;GO:0007399|nervous system development;GO:0030154|cell differentiation;GO:0030182|neuron differentiation;GO:0030514|negative	NA	NA	NA|(RefSeq) chordin-like 1	NA	NA	chordin-like 1	down
Gm2237	-2.66146	0.000224926	0.000744277	5	1	4	34	22	12	ENSMUSG00000093979	100039441	14	19563800	19585135	-	NA	NA	NA	NA|(RefSeq) predicted gene 2237	NA	NA	predicted gene 2237	down
Pgm5	-5.88606	7.28e-06	2.9e-05	0	1	0	29	26	13	ENSMUSG00000041731	226041	19	24683016	24861855	-	GO:0005975|carbohydrate metabolic process;GO:0006006|glucose metabolic process;GO:0007155|cell adhesion;GO:0071704|organic substance metabolic process	NA	NA	K15636|phosphoglucomutase-like protein 5	NA	NA	phosphoglucomutase 5	down
Pi16	-3.08599	0.000802533	0.00243243	3	2	0	18	15	12	ENSMUSG00000024011	74116	17	29318877	29329413	+	NA	NA	GO:0005576|extracellular region	K20412|peptidase inhibitor 16	NA	NA	peptidase inhibitor 16	down
Grhl2	7.32328	1.06e-08	5.57e-08	33	22	29	0	0	0	ENSMUSG00000022286	252973	15	37233036	37363569	+	GO:0001701|in utero embryonic development;GO:0001843|neural tube closure;GO:0003208|cardiac ventricle morphogenesis;GO:0003382|epithelial cell morphogenesis;GO:0006355|regulation of transcription, DNA-templated;GO:0006357|regulation of transcription by RN	NA	NA	K09275|transcription factor CP2 and related proteins	NA	NA	grainyhead like transcription factor 2	up
Car6	-3.5393	3.45e-32	6.28e-31	13	16	12	194	167	144	ENSMUSG00000028972	12353	4	150187015	150201332	-	GO:0001580|detection of chemical stimulus involved in sensory perception of bitter taste;GO:0006730|one-carbon metabolic process	NA	NA	K01672|carbonic anhydrase [EC:4.2.1.1]	mmu00910	Nitrogen metabolism	carbonic anhydrase 6	down
Cav1	-2.4994	0	0	2580	2649	2908	17085	16494	14969	ENSMUSG00000007655	12389	6	17306335	17341452	+	GO:0000122|negative regulation of transcription by RNA polymerase II;GO:0000188|inactivation of MAPK activity;GO:0001525|angiogenesis;GO:0001570|vasculogenesis;GO:0001666|response to hypoxia;GO:0001937|negative regulation of endothelial cell proliferation	NA	NA	K06278|caveolin 1	mmu04144|mmu04510|mmu05100|mmu05205|mmu05416|mmu05418	Endocytosis|Focal adhesion|Bacterial invasion of epithelial cells|Proteoglycans in cancer|Viral myocarditis|Fluid shear stress and atherosclerosis	caveolin 1, caveolae protein	down
Car5b	-2.15482	6.47e-206	2.01e-203	584	588	550	2749	2744	2582	ENSMUSG00000031373	56078	X	163976822	164027997	-	GO:0009617|response to bacterium	NA	NA	K01672|carbonic anhydrase [EC:4.2.1.1]	mmu00910	Nitrogen metabolism	carbonic anhydrase 5b, mitochondrial	down
Cbr2	-2.54965	2.18e-84	1.54e-82	122	144	119	948	679	759	ENSMUSG00000025150	12409	11	120729489	120732114	-	GO:0006116|NADH oxidation;GO:0051262|protein tetramerization;GO:0055114|oxidation-reduction process	NA	NA	K00081|carbonyl reductase 2 [EC:1.1.1.184]	mmu00590|mmu00980|mmu01100	Arachidonic acid metabolism|Metabolism of xenobiotics by cytochrome P450|Metabolic pathways	carbonyl reductase 2	down
Cd36	5.97424	3.13e-05	0.000115928	15	12	6	0	0	0	ENSMUSG00000002944	12491	5	17781690	17888801	-	GO:0000122|negative regulation of transcription by RNA polymerase II;GO:0001676|long-chain fatty acid metabolic process;GO:0001954|positive regulation of cell-matrix adhesion;GO:0002221|pattern recognition receptor signaling pathway;GO:0003085|negative re	NA	NA	K06259|CD36 antigen	mmu03320|mmu04145|mmu04152|mmu04512|mmu04640|mmu04920|mmu04931|mmu04975|mmu04979|mmu05144	PPAR signaling pathway|Phagosome|AMPK signaling pathway|ECM-receptor interaction|Hematopoietic cell lineage|Adipocytokine signaling pathway|Insulin resistance|Fat digestion and absorption|Cholesterol metabolism|Malaria	CD36 molecule	up
Cd34	-2.00723	2.25e-283	1.28e-280	958	902	990	4416	3951	3732	ENSMUSG00000016494	12490	1	194938819	194961279	+	GO:0001894|tissue homeostasis;GO:0001935|endothelial cell proliferation;GO:0003094|glomerular filtration;GO:0003158|endothelium development;GO:0007155|cell adhesion;GO:0007165|signal transduction;GO:0008217|regulation of blood pressure;GO:0008283|cell pop	NA	NA	K06474|CD34 antigen	mmu04514|mmu04640	Cell adhesion molecules (CAMs)|Hematopoietic cell lineage	CD34 antigen	down
Cd33	2.62547	0.000767721	0.00233572	14	15	18	2	3	3	ENSMUSG00000004609	12489	7	43524216	43544428	-	GO:0007155|cell adhesion	NA	NA	K06473|CD33 antigen	mmu04640	Hematopoietic cell lineage	CD33 antigen	up
Cd53	4.22321	3.55e-06	1.47e-05	17	24	31	0	0	4	ENSMUSG00000040747	12508	3	106759921	106790149	-	GO:1901741|positive regulation of myoblast fusion	NA	NA	K06489|CD53 antigen	NA	NA	CD53 antigen	up
Cd48	5.25448	0.00109548	0.00325038	6	2	12	0	0	0	ENSMUSG00000015355	12506	1	171682009	171705258	+	GO:0002819|regulation of adaptive immune response;GO:0007165|signal transduction;GO:0042110|T cell activation;GO:0045576|mast cell activation	NA	NA	K06479|CD48 antigen	mmu04650	Natural killer cell mediated cytotoxicity	CD48 antigen	up
Phyh	-5.20063	0.00110093	0.00326507	0	0	0	11	9	2	ENSMUSG00000026664	16922	2	4919019	4938730	+	GO:0001561|fatty acid alpha-oxidation;GO:0006103|2-oxoglutarate metabolic process;GO:0006631|fatty acid metabolic process;GO:0006720|isoprenoid metabolic process;GO:0055114|oxidation-reduction process;GO:0097089|methyl-branched fatty acid metabolic proces	NA	NA	K00477|phytanoyl-CoA hydroxylase [EC:1.14.11.18]	mmu04146	Peroxisome	phytanoyl-CoA hydroxylase	down
Car14	2.29994	0.000159419	0.000538221	29	20	21	6	4	5	ENSMUSG00000038526	23831	3	95897768	95904691	-	GO:0006885|regulation of pH;GO:0015670|carbon dioxide transport	NA	NA	K01672|carbonic anhydrase [EC:4.2.1.1]	mmu00910	Nitrogen metabolism	carbonic anhydrase 14	up
Cd68	3.75564	4.76e-127	6.66e-125	640	636	671	47	56	49	ENSMUSG00000018774	12514	11	69664213	69666153	-	GO:0071310|cellular response to organic substance	NA	NA	K06501|CD68 antigen	mmu04142	Lysosome	CD68 antigen	up
Gm2061	5.18097	0.00103051	0.00307545	6	5	8	0	0	0	ENSMUSG00000097615	100039138	1	185447116	185455568	-	NA	NA	NA	NA|(RefSeq) predicted gene 2061	NA	NA	predicted gene 2061	up
Ccl9	-4.4159	1.61e-257	7.56e-255	81	50	78	1767	1608	1346	ENSMUSG00000019122	20308	11	83572919	83578636	-	GO:0006935|chemotaxis;GO:0006955|immune response;GO:0010469|regulation of signaling receptor activity;GO:0045662|negative regulation of myoblast differentiation;GO:0060326|cell chemotaxis	NA	NA	K22671|C-C motif chemokine 9	mmu04060|mmu04062	Cytokine-cytokine receptor interaction|Chemokine signaling pathway	chemokine (C-C motif) ligand 9	down
Plcl1	5.90432	6.98e-06	2.79e-05	15	21	25	0	0	1	ENSMUSG00000038349	227120	1	55405921	55754285	+	GO:0006629|lipid metabolic process;GO:0007165|signal transduction;GO:0007214|gamma-aminobutyric acid signaling pathway;GO:0032228|regulation of synaptic transmission, GABAergic;GO:0033135|regulation of peptidyl-serine phosphorylation;GO:0035556|intracellu	NA	NA	K15375|inactive phospholipase C-like protein 1	mmu04727	GABAergic synapse	phospholipase C-like 1	up
Cyp4f13	2.03117	1.36e-22	1.68e-21	235	256	217	86	41	57	ENSMUSG00000024055	170716	17	32924688	32947402	-	GO:0006691|leukotriene metabolic process;GO:0055114|oxidation-reduction process	NA	NA	K17726|phylloquinone omega-hydroxylase / docosahexaenoic acid omega-hydroxylase / leukotriene-B4 20-monooxygenase [EC:1.14.14.78 1.14.14.79 1.14.14.94]	mmu00590|mmu01100	Arachidonic acid metabolism|Metabolic pathways	cytochrome P450, family 4, subfamily f, polypeptide 13	up
Cdh3	-2.8986	0.00253324	0.00702694	2	3	0	19	13	8	ENSMUSG00000061048	12560	8	106510891	106557297	+	GO:0001895|retina homeostasis;GO:0007155|cell adhesion;GO:0007156|homophilic cell adhesion via plasma membrane adhesion molecules;GO:0010628|positive regulation of gene expression;GO:0010838|positive regulation of keratinocyte proliferation;GO:0022405|hai	NA	NA	K06796|cadherin 3, type 1, P-cadherin	mmu04514	Cell adhesion molecules (CAMs)	cadherin 3	down
Cdh1	-2.93519	1.7e-36	3.69e-35	31	28	26	217	242	224	ENSMUSG00000000303	12550	8	106603351	106670246	+	GO:0007155|cell adhesion;GO:0007156|homophilic cell adhesion via plasma membrane adhesion molecules;GO:0007416|synapse assembly;GO:0009636|response to toxic substance;GO:0010033|response to organic substance;GO:0010468|regulation of gene expression;GO:002	NA	NA	K05689|cadherin 1, type 1, E-cadherin	mmu04015|mmu04371|mmu04390|mmu04514|mmu04520|mmu05100|mmu05200|mmu05213|mmu05216|mmu05218|mmu05219|mmu05226	Rap1 signaling pathway|Apelin signaling pathway|Hippo signaling pathway|Cell adhesion molecules (CAMs)|Adherens junction|Bacterial invasion of epithelial cells|Pathways in cancer|Endometrial cancer|Thyroid cancer|Melanoma|Bladder cancer|Gastric cancer	cadherin 1	down
Trim30d	-2.95331	4.05e-107	4.35e-105	102	98	99	1016	739	704	ENSMUSG00000057596	209387	7	104470014	104507849	-	GO:0006914|autophagy;GO:0008150|biological_process;GO:0016567|protein ubiquitination;GO:0045087|innate immune response;GO:0051607|defense response to virus	NA	NA	K10648|tripartite motif-containing protein 5 [EC:2.3.2.27]	mmu05170	Human immunodeficiency virus 1 infection	tripartite motif-containing 30D	down
Cdsn	-3.74668	3.69e-195	1.05e-192	87	89	70	1191	1193	1095	ENSMUSG00000039518	386463	17	35552128	35557180	+	GO:0043589|skin morphogenesis	NA	NA	NA|(RefSeq) corneodesmosin	NA	NA	corneodesmosin	down
Platr3	-2.54212	2.08e-41	5.28e-40	41	55	50	336	283	280	ENSMUSG00000084762	NA	2	135648907	135652063	+	NA	NA	NA	NA	NA	NA	pluripotency associated transcript 3	down
Gm38300	4.06538	0.00011193	0.00038627	14	14	19	2	1	0	ENSMUSG00000104279	NA	1	178339601	178341470	+	NA	NA	NA	NA	NA	NA	predicted gene, 38300	up
Gm14328	-2.07172	5.16e-07	2.33e-06	9	10	16	61	50	45	ENSMUSG00000095419	NA	18	74303524	74303931	-	NA	NA	NA	NA	NA	NA	predicted gene 14328	down
2810408A11Rik	-2.30848	0.000472059	0.00148634	3	6	4	35	15	19	ENSMUSG00000018570	70419	11	69897352	69900987	-	GO:0009966|regulation of signal transduction;GO:0032515|negative regulation of phosphoprotein phosphatase activity;GO:0043666|regulation of phosphoprotein phosphatase activity	NA	NA	NA|(RefSeq) RIKEN cDNA 2810408A11 gene	NA	NA	RIKEN cDNA 2810408A11 gene	down
Ccnb1ip1	-2.53167	4e-06	1.64e-05	4	4	9	36	40	28	ENSMUSG00000071470	239083	14	50789248	50807732	-	GO:0001825|blastocyst formation;GO:0007131|reciprocal meiotic recombination;GO:0007286|spermatid development;GO:0016567|protein ubiquitination;GO:0051026|chiasma assembly;GO:0051321|meiotic cell cycle	NA	NA	K10639|E3 ubiquitin-protein ligase CCNP1IP1 [EC:2.3.2.27]	NA	NA	cyclin B1 interacting protein 1	down
Gm38357	3.36838	1.52e-05	5.81e-05	19	30	19	2	5	0	ENSMUSG00000103313	NA	3	51231917	51234380	+	NA	NA	NA	NA	NA	NA	predicted gene, 38357	up
Pkp1	-2.4051	4.55e-06	1.85e-05	6	4	9	37	34	35	ENSMUSG00000026413	18772	1	135871395	135919207	-	GO:0007155|cell adhesion;GO:0010628|positive regulation of gene expression;GO:0045110|intermediate filament bundle assembly;GO:0098609|cell-cell adhesion;GO:1902373|negative regulation of mRNA catabolic process	NA	NA	K10387|plakophilin 1	NA	NA	plakophilin 1	down
Grk1	4.84763	2.89e-08	1.47e-07	63	25	23	0	1	3	ENSMUSG00000031450	24013	8	13405081	13421951	+	GO:0006468|protein phosphorylation;GO:0007165|signal transduction;GO:0007601|visual perception;GO:0016310|phosphorylation;GO:0022400|regulation of rhodopsin mediated signaling pathway;GO:0046777|protein autophosphorylation	NA	NA	K00909|rhodopsin kinase [EC:2.7.11.14]	mmu04062|mmu04144|mmu04744	Chemokine signaling pathway|Endocytosis|Phototransduction	G protein-coupled receptor kinase 1	up
Gm38403	-2.64047	2.15e-25	3e-24	22	23	32	194	159	155	ENSMUSG00000112854	216377	10	118920381	118927143	-	NA	NA	NA	NA|(RefSeq) predicted gene, 38403	NA	NA	predicted gene, 38403	down
Gdap1l1	-3.94351	2.29e-13	1.7e-12	3	7	2	57	61	75	ENSMUSG00000017943	228858	2	163438476	163455324	+	NA	NA	GO:0016020|membrane;GO:0016021|integral component of membrane	K22077|ganglioside-induced differentiation-associated protein 1	NA	NA	ganglioside-induced differentiation-associated protein 1-like 1	down
